# Supplementary material for: Structural variants and modifications of hammerhead ribozymes targeting influenza A virus conserved structural motifs
Source: PubMed Central journal article supplement (PMC9217987; doi:10.1016/j.omtn.2022.05.035), 2022-05-31
Supplement: mmc1.pdf [file mmc1.pdf]

**OMTN, Volume 29**

**Supplemental information**

**Structural variants and modifications  
of hammerhead ribozymes targeting  
influenza A virus conserved structural motifs**

**Tomasz Czapik, Julita Piasecka, Ryszard Kierzek, and Elzbieta Kierzek**

**S1. (+)RNA5 A/California/04/2009 (H1N1) secondary structure.**

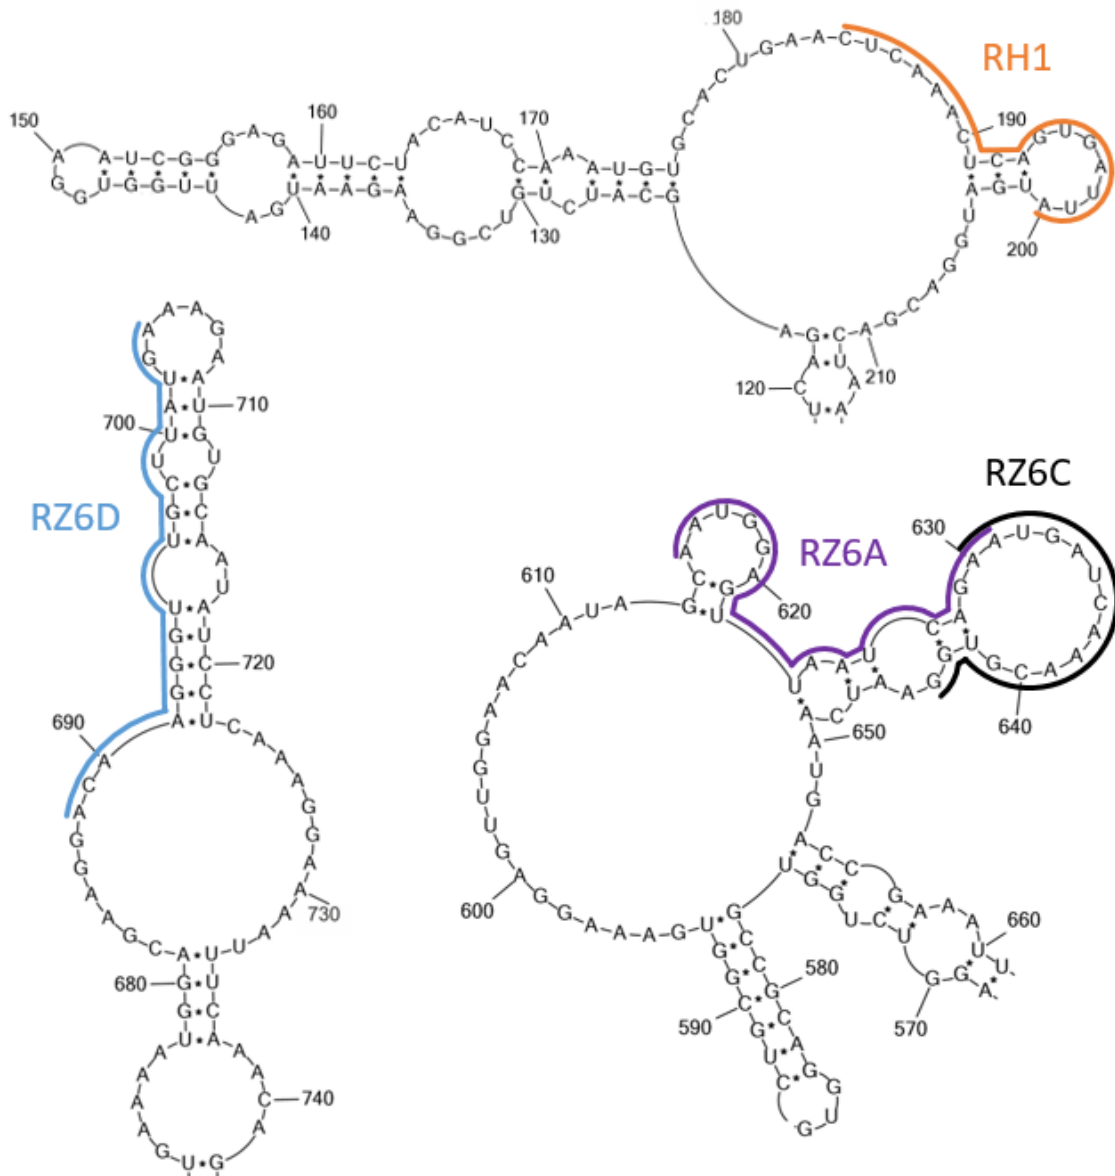

**Figure S1.** Target regions of hammerhead ribozymes in the (+)RNA5 A/California/04/2009 (H1N1) secondary structure. Secondary structure of (+)RNA5 A/California/04/2009 (H1N1) was previously published<sup>1</sup>. Target regions for analyzed hammerhead ribozymes are marked with colored lines.

## S2. Modified nucleosides .

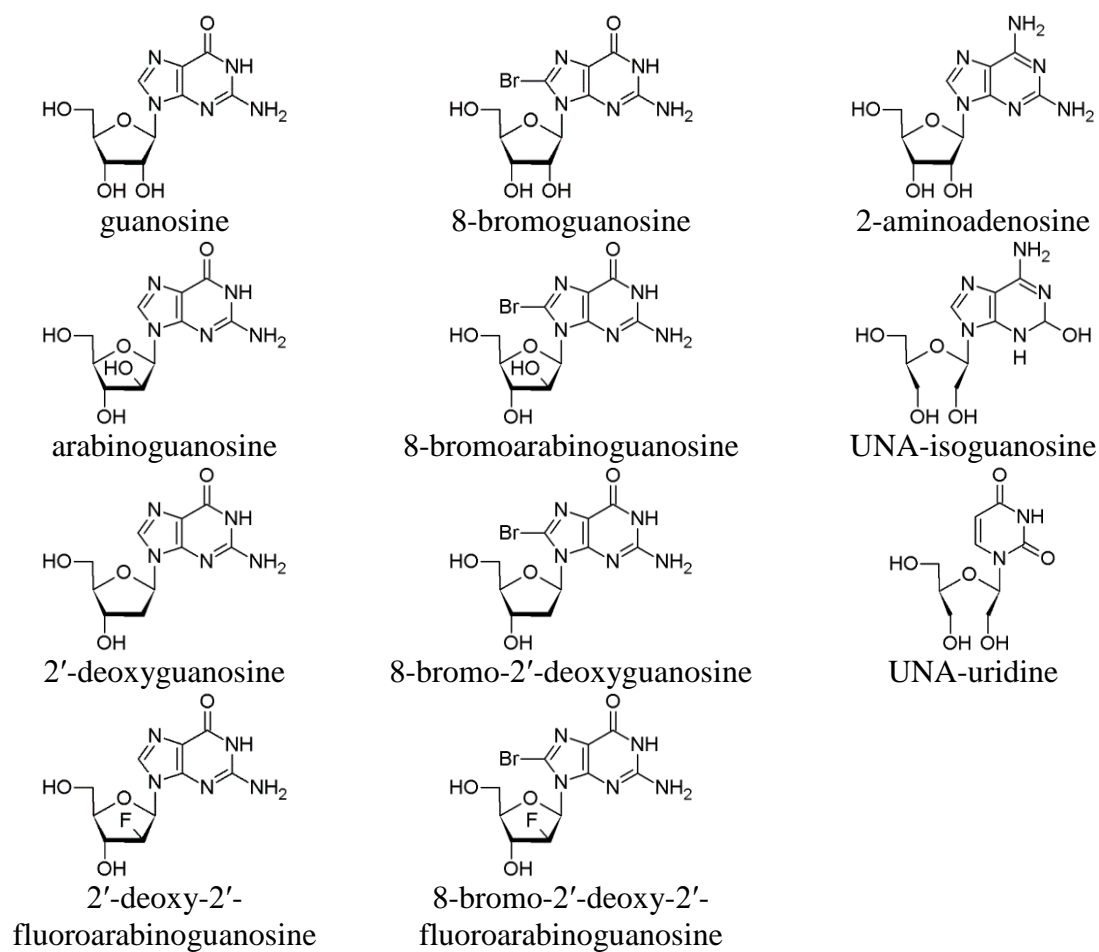

**Figure S2.** Structural formulas of guanosine derivatives.

### S3. Nucleoside and Phosphoramidite synthesis.

**General.** Guanosine, adenosine and 2,6-diaminopurine riboside used for synthesis and most other reagents were purchased from Sigma-Aldrich and Merck. Dimethoxytrityl chloride and 2-cyanoethyl N,N,N',N'-tetraisopropylphosphorodiamidite were purchased from ChemGenes. Solvents were used at the highest available purity and dried with molecular sieves, if necessary. NMR spectra were acquired using a Bruker Avance II (400 MHz) or Avance III (500 MHz) or Avance III (700 MHz) spectrophotometer. For  $^1\text{H}$ ,  $^{13}\text{C}$ ,  $^{19}\text{F}$  and  $^{31}\text{P}$  NMR spectra TMS,  $\text{H}_3\text{PO}_4$  and trifluoroacetic acid, respectively, were used as references.

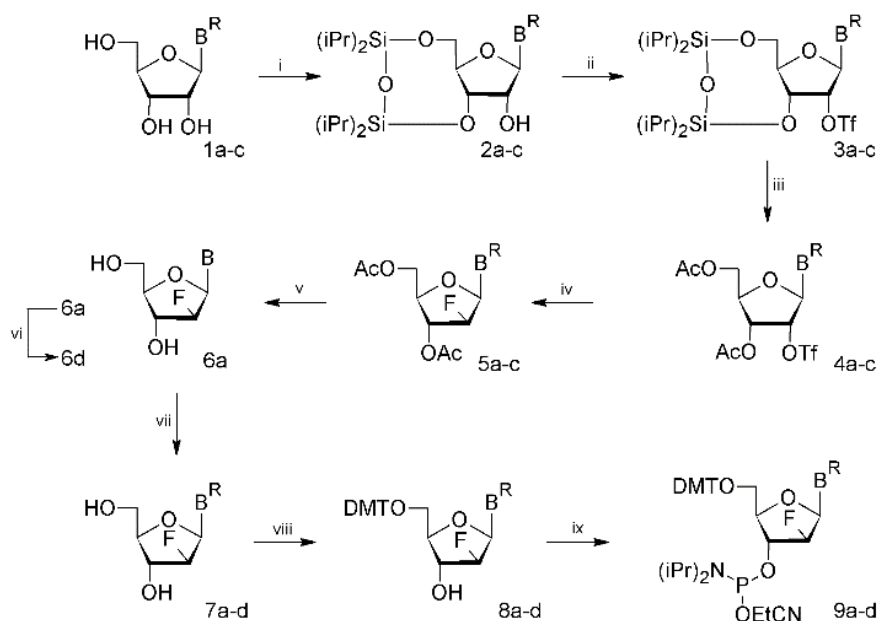

**Scheme S1.** Synthesis of 2'-deoxy-2'-fluoropurine nucleosides marked as following: a – guanine, b – adenine, c – 2,6-diaminopurine, d – 8-bromoguanine, respectively. Where: i means 1,3-dichloro-1,1,3,3-tetraisopropylidisiloxane/pyridine; ii means triflate anhydride, DMAP/dichloromethane, pyridine; iii means triethylammonium fluoride (TEAHF), acetic anhydride/pyridine; iv means TEAHF/THF, pyridine; v means ammonia/methanol; vi means bromine/water; vii means dimethylformamide dimethyl acetal/methanol; viii means 4,4'-

dimethoxytrityl chloride/pyridine and iv means 2-cyanoethyl N,N,N',N'-tetraisopropylphosphoramidite, terazole/acetonitrile.

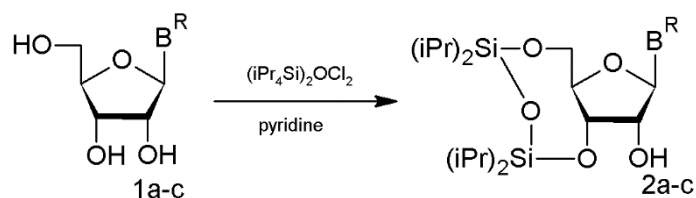

**N-protected-3',5'-O-(tetraisopropylidisiloxane-1,3-diyl)-purine riboside** (step i). N-protected purine riboside (**1**) (1 equiv) suspension was evaporated twice with anhydrous pyridine. The dried residue was suspended in pyridine (5 ml per 1 mmol) and 1,1,3,3-tetraisopropylidisiloxane-1,3-dichloride (1.1 equiv) was added. After 3 h at room temperature (rt), the reaction was completed, worked up with aqueous solution of sodium bicarbonate, and extracted 3 times with dichloromethane. The combined organic layers were dried with anhydrous sodium sulfate, filtered and evaporated to obtain product (**2**) as white foam. Yield ca. 100 %.

*N*<sup>2</sup>-(dimethylaminomethylene)-3',5'-O-(tetraisopropylidisiloxane-1,3-diyl)-guanosine (**2a**). <sup>1</sup>H NMR (400 MHz, dms<sub>o</sub>-d<sub>6</sub>), δ, ppm: 11.34 (s, 1H, NH), 8.54 (s, 1H, CH dmm), 7.85 (s, 1H, H-8), 5.79 (d, J<sub>H-H</sub> = 3.92 Hz, 1H, H-1'), 5.68 (s, 1H, 2'-OH), 4.36 (m, 2H, H-3', H-2'), 4.09-3.91 (m, 3H, H-5', H-5'', H-4'), 3.14 (s, 3H, CH<sub>3</sub> dmm), 3.02 (s, 3H, CH<sub>3</sub> dmm), 0.99-1.04 (m, 28H, (iPr)<sub>4</sub>); <sup>13</sup>C NMR (100 MHz, dms<sub>o</sub>-d<sub>6</sub>), δ, ppm : 157.93, 157.54, 157.40, 149.32, 135.37, 119.65, 88.10, 80.95, 73.83, 69.67, 60.73, 17.27, 17.11, 17.08, 16.90, 16.84, 16.81, 16.74, 12.75, 12.40, 12.25, 11.98; HRMS (ESI): calcd for C<sub>25</sub>H<sub>44</sub>N<sub>6</sub>O<sub>6</sub>Si<sub>2</sub> [M+H]<sup>+</sup> 581.2934; found 581.2932;

*N*<sup>6</sup>-benzoyl-3',5'-O-(tetraisopropylidisiloxane-1,3-diyl)-adenosine (**2b**) <sup>1</sup>H NMR (400 MHz, dms<sub>o</sub>-d<sub>6</sub>), δ, ppm: 11.24 (s, 1H, NH), 8.67 (s, 1H, H-2), 8.53 (s, 1H, H8), 8.06 - 7.53 (5H, H-

Ar), 6.01 (d, 1H, H-1'), 5.68 (d, 1H, 2'-OH), 4.84-4.81 (m, 1H, 2'), 4.65, (m, 1H, 3') 4.09-3.93 (m, 3H, 4', 5', 5''), 1.06 - 0.94 (m, 28H, (iPr)<sub>4</sub>); <sup>13</sup>C NMR (100 MHz, dms<sub>o</sub>-d<sub>6</sub>), δ, ppm: 165.68, 151.41, 150.48, 143.07, 133.34, 132.43, 128.48, 128.43, 128.16, 127.41, 125.95, 89.52, 80.95, 73.38, 69.86, 60.72, 54.88, 17.32, 17.18, 17.17, 17.13, 17.01, 16.89, 16.81, 12.73, 12.42, 12.25, 12.05; HRMS (ESI): calcd for C<sub>29</sub>H<sub>43</sub>N<sub>5</sub>O<sub>6</sub>Si<sub>2</sub> [M+H]<sup>+</sup> 614.2825; found 614.2831;

*N*<sup>2</sup>,*N*<sup>6</sup>-diacetyl-3',5'-*O*-(tetraisopropylidisiloxane-1,3-diyl)-2-aminoadenosine (**2c**) <sup>1</sup>H NMR (400 MHz, dms<sub>o</sub>-d<sub>6</sub>): δ 10.56 (s, 1H, NH), 10.30 (s, 1H, NH), 8.32 (s, 1H, H-8), 5.89 (s, 1H, H-1'), 5.59 (s, 1H, 2'-OH), 4.55 - 4.50 (m, 2H, H-2', H-3'), 4.09 - 3.92 (m, 3H, H-4', H-5', H-5''), 2.31 (s, 3H, Ac CH<sub>3</sub>), 2.22 (s, 3H, Ac CH<sub>3</sub>), 1.05-0.85 (m, (iPr)<sub>4</sub>); <sup>13</sup>C NMR (176 MHz, dms<sub>o</sub>-d<sub>6</sub>), δ, ppm: 169.88, 152.68, 152.40, 150.15, 141.30, 120.30, 89.09, 81.86, 73.87, 70.57, 61.51, 25.13, 24.98, 17.83, 17.67, 17.64, 17.57, 17.49, 17.41, 17.35, 13.18, 12.94, 12.68, 12.51; HRMS (ESI): calcd for C<sub>26</sub>H<sub>44</sub>N<sub>6</sub>O<sub>7</sub>Si<sub>2</sub> [M-H]<sup>-</sup> 607.2737; found 607.2747;

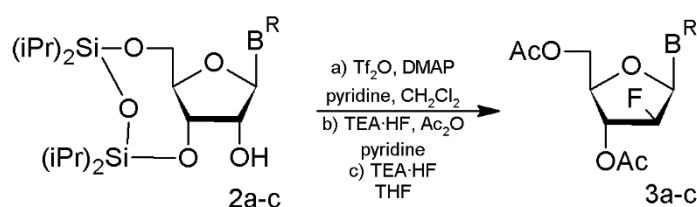

#### **N-protected 3',5'-di-O-acetyl-2'-deoxy-2'-fluoropurine arabinoside (step ii).**

a) N-protected-3',5'-*O*-(tetraisopropylidisiloxane-1,3-diyl)-purine riboside (**2**) (1 equiv) was dissolved in anhydrous dichloromethane (6 ml per 1 mmol) with the addition of pyridine (0.2 ml per 1 mmol) and 4-dimethylaminopyridine (DMAP) (5 equiv). The mixture was cooled in an ice bath for 30 min and trifluoromethanesulfonyl anhydride (7 equiv) was added dropwise over 15 min. Then, the reaction mixture was left at rt for 2 h to complete the reaction. The reaction mixture was worked up with an aqueous solution of sodium bicarbonate and extracted

3 times with dichloromethane. The organic layer was washed with an aqueous solution of dibasic sodium phosphate and the combined organic layers were dried with anhydrous sodium sulfate, filtered and evaporated.

b) Residue from previous reaction was dissolved in a 1 molar pyridine solution of triethylammonium fluoride (4 equiv), and acetic anhydride (8 equiv) was added. The mixture was left for 2 h at rt in a plastic container. After that time, the reaction was completed, and the reaction mixture was worked up with an aqueous solution of sodium bicarbonate and was extracted 3 times with dichloromethane. The combined organic layers were dried with anhydrous sodium sulfate, filtered and evaporated.

c) Prepared N-protected 2'-O-trifluoromethanesulfonyl-3',5'-di-O-acetyluracil riboside without further purification was dissolved in anhydrous tetrahydrofuran (5 ml per 1 mmol), and a 1 molar pyridine solution of TEAHF (7 equiv) was added. The mixture was left for 64 h at 37° C. After that time, <sup>19</sup>F NMR signal at -74.57 ppm disappeared, and a new signal at -198.43 ppm was indicated. The reaction mixture was worked up with an aqueous solution of sodium bicarbonate and was extracted 3 times with dichloromethane. The combined organic layers were dried with anhydrous sodium sulfate, filtered and evaporated. Product (**3**) without purification was used for the next reaction.

*3',5'-di-O-acetyl-N<sup>2</sup>-(dimethylaminomethylene)-2'-deoxy-2'-fluoroarabinoguanosine (3a)*. <sup>1</sup>H NMR (500 MHz, dms<sub>o</sub>-d<sub>6</sub>), δ, ppm: 11.44 (s, 1H, NH), 8.62 (s, 1H, CH dmm), 7.87 (d, 1H, H-8), 6.34 (dd, 1H, H-1', J<sub>H-F</sub> = 15.18 Hz), 5.74 (m, 1H, H-2', J<sub>H-F</sub> = 19.30 Hz), 5.56 (m, 1H, H-3', J<sub>H-F</sub> = -51.20 Hz), 4.41-4.23 (m, 3H, H-5', H-5'', H-4'), 3.18 (s, 3H, CH<sub>3</sub> dmm), 3.05 (s, 3H, CH<sub>3</sub> dmm), 2.15 (s, 3H, CH<sub>3</sub> Ac), 2.03 (s, 3H, CH<sub>3</sub> Ac); <sup>13</sup>C NMR (125 MHz, dms<sub>o</sub>-d<sub>6</sub>), δ, ppm: 170.60, 170.32, 158.48, 157.98, 150.11, 138.12, 119.73, 93.76, 92.23, 81.89, 81.76, 77.84, 75.71, 75.49, 63.42, 41.09, 40.54-39.45, 35.18, 21.11, 20.93, 17.77, 13.08; <sup>19</sup>F NMR

(470 MHz, dms $\text{-d}_6$ ),  $\delta$ , ppm: -198.43 (ddd, 1F,  $J_{\text{H-F}} = 17.36$  Hz,  $J_{\text{H}2'\text{-F}} = -51.58$  Hz); HRMS (ESI): calcd for  $\text{C}_{17}\text{H}_{21}\text{FN}_6\text{O}_6$   $[\text{M}+\text{H}]^+$  425.1579; found 425.1573;

*3',5'-di-O-acetyl-N<sup>6</sup>-benzoyl-2'-deoxy-2'-fluoroarabinoadenosine (3b)*.  $^1\text{H}$  NMR (500 MHz, dms $\text{-d}_6$ ),  $\delta$ , ppm: 11.27 (s, 1H, NH), 8.81 (s, 1H, H-2), 8.56 (s, 1H, H-8), 8.06-7.54 (5H, H-Ar), 6.64 (dd, 1H, H-1',  $J_{\text{H-F}} = 15.18$  Hz), 5.71-5.57 (m, 2H), 4.44-4.33 (m, 3H), 2.16 (s, 3H,  $\text{CH}_3$  Ac), 2.05 (s, 3H,  $\text{CH}_3$  Ac);  $^{13}\text{C}$  NMR (125 MHz, dms $\text{-d}_6$ ),  $\delta$ , ppm: 170.16, 169.63, 152.03, 151.91, 150.57, 143.24, 143.19, 133.24, 132.51, 128.51, 128.48, 93.68, 91.77, 81.96, 81.80, 78.17, 78.13, 75.41, 75.13, 63.00, 20.61, 20.52;  $^{19}\text{F}$  NMR (470 MHz, dms $\text{-d}_6$ ),  $\delta$ , ppm: -197.90 (ddd, 1F,  $J_{\text{H-F}} = 17.18$  Hz,  $J_{\text{H}2'\text{-F}} = -51.74$  Hz); HRMS (ESI): calcd for  $\text{C}_{21}\text{H}_{20}\text{FN}_5\text{O}_6$   $[\text{M}+\text{H}]^+$  458.1470; found 458.1453;

*N<sup>2</sup>,N<sup>6</sup>-diacetyl-3',5'-di-O-acetyl-2'-deoxy-2'-fluoro-2-aminoarabinoadenosine (3c)*.  $^1\text{H}$  NMR (500 MHz, dms $\text{-d}_6$ ),  $\delta$ , ppm: 10.43 (s, 1H, NH), 8.36 (s, 1H, H8), 6.44 (dd, 1H, H-1',  $J_{\text{H}1'\text{-F}} = 16.73$  Hz,  $J_{\text{H}1'\text{-H}2'} = 3.96$  Hz), 5.65-5.51 (m, 2H), 4.41-4.32 (m, 4H), 2.32 (s, 3H, NAc  $\text{CH}_3$ ), 2.23 (s, 3H, NAc  $\text{CH}_3$ ), 2.14 (s, 3H, OAc  $\text{CH}_3$ ), 2.04 (s, 3H, OAc  $\text{CH}_3$ );  $^{13}\text{C}$  NMR (125 MHz, dms $\text{-d}_6$ ),  $\delta$ , ppm: 170.65, 169.98, 169.92, 152.93, 152.79, 142.39, 119.51, 94.02, 92.49, 82.24, 82.10, 78.76, 75.93, 75.72, 63.61, 25.09, 25.06, 21.07, 21.00, 20.95, 20.81, 20.69, 19.00, 17.76, 13.08;  $^{19}\text{F}$  NMR (470 MHz, dms $\text{-d}_6$ ),  $\delta$ , ppm: -197.75 (ddd, 1F,  $J_{\text{H-F}} = 17.28$  Hz,  $J_{\text{H}2'\text{-F}} = -50.92$  Hz); HRMS (ESI): calcd for  $\text{C}_{18}\text{H}_{21}\text{FN}_6\text{O}_7$   $[\text{M}+\text{H}]^+$  453.1529; found 453.1514;

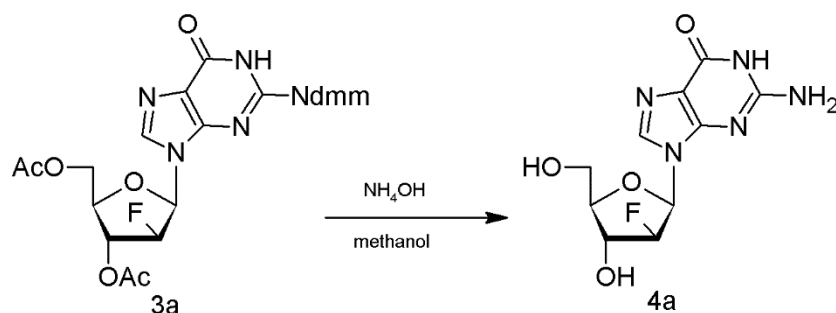



**2'-deoxy-2'-fluoroarabinoguanosine** (step iii). The residue from the previous reaction was dissolved in methanol (5 ml per 1 mmol) and 25 % aqueous ammonia (5 ml per 1 mmol) was added; the reaction was left in sealed vessel overnight at 55 °C. The mixture was cooled and evaporated twice with isopropanol to dryness. The yield for the two last steps was 60 %.

*2'-deoxy-2'-fluoroarabinoguanosine* (**4a**). <sup>1</sup>H NMR (500 MHz, dms<sub>o</sub>-d<sub>6</sub>), δ, ppm: 10.94 (s, 1H, NH), 7.77 (s, 1H, H-8), 6.65 (s, 1H), 6.13 (dd, 1H, H-1', J<sub>H-F</sub> = 16.19 Hz), 5.10 (m, 2H, H-2', J<sub>H2'-F</sub> = -52.45 Hz, 2'-OH), 4.36 (dt, 1H, H-3', J<sub>H-F</sub> = 17.87 Hz), 3.80 (m, 1H, H-4'), 3.40 (m, 2H, H-5', H-5''); <sup>13</sup>C NMR (176 MHz, dms<sub>o</sub>-d<sub>6</sub>), δ, ppm: 171.98, 157.10, 154.52, 151.31, 136.27, 136.24, 116.35, 96.12, 95.03, 84.14, 84.12, 81.73, 81.64, 73.18, 73.05, 60.90, 40.32-39.60, 22.97; <sup>19</sup>F NMR (376 MHz, dms<sub>o</sub>-d<sub>6</sub>), δ, ppm: -198.09 (ddd, 1F, J<sub>H-F</sub> = 16.99 Hz, J<sub>H2'-F</sub> = -52.40 Hz); HRMS (ESI): calcd for C<sub>10</sub>H<sub>12</sub>FN<sub>5</sub>O<sub>4</sub> [M+H]<sup>+</sup> 286.0946; found 286.0941;

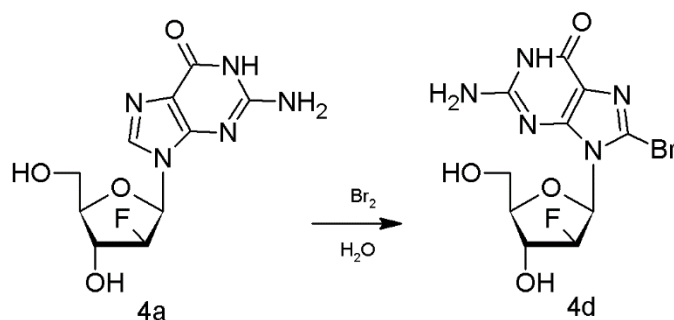

**2'-deoxy-2'-fluoro-8-bromoarabinoguanosine** (**4d**) (step iv). *2'-Deoxy-2'-fluoroarabinoguanosine* (**4a**) was suspended in water and aqueous bromine was added dropwise until discoloration occurred. The product (**4d**), in the form of a white precipitate, was filtered and dried.

<sup>1</sup>H NMR (500 MHz, dms<sub>o</sub>-d<sub>6</sub>), δ, ppm: 10.83 (s, 1H, NH), 6.52 (s, 1H, 2'-OH), 6.27 (dd, 1H, H-1', J<sub>H-F</sub> = 16.19 Hz), 5.23 (dt, 1H, H-2', J<sub>H2'-F</sub> = -52.45 Hz), 4.68 (dt, 1H, H-3'), 3.78-3.71 (m, 3H, H-4', H-5', H-5''); <sup>13</sup>C NMR (125 MHz, dms<sub>o</sub>-d<sub>6</sub>), δ, ppm: 155.45, 153.55, 152.35, 119.67, 116.97, 97.40, 95.45, 82.20, 82.11, 82.08, 81.90, 73.61, 73.40, 61.53; <sup>19</sup>F NMR (376 MHz,

dms $\text{-d}_6$ ),  $\delta$ , ppm: -197.05 (dq, 1F,  $J_{\text{H-F}} = 10.06$  Hz,  $J_{\text{H-F}} = 21.88$  Hz,  $J_{\text{H}2'\text{-F}} = -54.17$  Hz); HRMS (ESI): calcd for  $\text{C}_{10}\text{H}_{11}\text{BrFN}_5\text{O}_4$   $[\text{M}+\text{H}]^+$  364.0051; found 364.0055

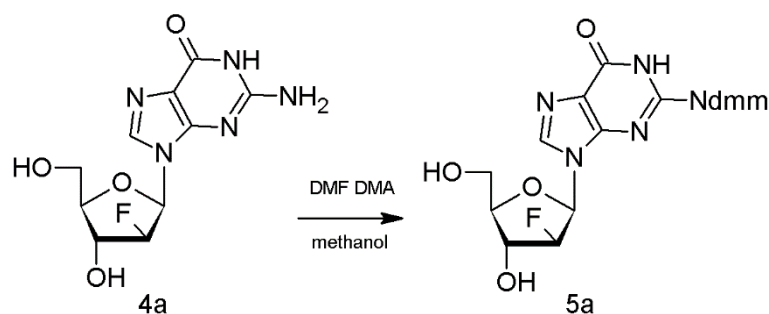

**N<sup>2</sup>-(dimethylaminomethylene)-2'-deoxy-2'-fluoroarabinoguanosine (5a)** (step v). 2'-Deoxy-2'-fluoroarabinoguanosine (**4a**) was evaporated twice with methanol. The substrate was suspended in methanol (5 ml per 1 mmol) and N,N-dimethylformamide dimethyl acetal (DMF DMA) (5 equiv) was added and stirred for 6 h at 50 °C. Product (**5a**) was filtered, dried and used without further purification.

<sup>1</sup>H NMR (500 MHz, dms $\text{-d}_6$ ),  $\delta$ , ppm: 8.59 (s, 1H, CH dmm), 7.89 (d, 1H, H-8), 6.29 (dd, 1H, H-1',  $J_{\text{H-H}} = 4.48$  Hz,  $J_{\text{H-F}} = 15.69$  Hz), 5.16 (dt, 1H, H-2',  $J_{\text{H}2'\text{-F}} = -52.55$  Hz), 4.41 (dt, 1H, H-3',  $J_{\text{H-F}} = 19.11$  Hz), 4.09 (m, 1H, H-4'), 3.63 (m, 2H, H-5', H5''), 3.16 (s, 3H, CH<sub>3</sub> dmm), 3.03 (s, 3H, CH<sub>3</sub> dmm); <sup>13</sup>C NMR (125 MHz, dms $\text{-d}_6$ ),  $\delta$ , ppm: 162.80, 151.70, 135.23, 116.68, 96.50, 94.98, 83.98, 83.95, 81.65, 81.52, 73.40, 73.21, 61.01, 36.25, 31.23; <sup>19</sup>F NMR (376 MHz, dms $\text{-d}_6$ ),  $\delta$ , ppm: -197.27 (ddd, 1F,  $J_{\text{H-F}} = 17.26$  Hz,  $J_{\text{H}2'\text{-F}} = -52.45$  Hz); HRMS (ESI): calcd for  $\text{C}_{13}\text{H}_{17}\text{FN}_6\text{O}_4$   $[\text{M}+\text{H}]^+$  341.1368; found 341.1366

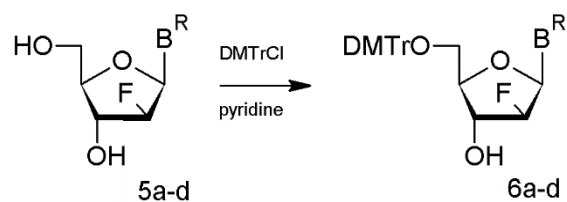

**N-protected 5'-O-(4,4'-dimethoxytrityl)-2'-deoxy-2'-fluoropurine arabinoside** (step vi).

Base-protected 2'-deoxy-2'-fluoropurine arabinoside (**5**) was evaporated twice with anhydrous pyridine and dissolved in pyridine (5 ml per 1 mmol). The dimethoxytrityl chloride (1.1 equiv) was added and the mixture was stirred at rt for 3 h. After reaction completion, the reaction mixture was worked up with an aqueous solution of sodium bicarbonate and extracted 3 times with dichloromethane. The combined organic layers were dried with anhydrous sodium sulfate, filtered and evaporated. Product (**6**) was purified by silica gel column chromatography using dichloromethane and methanol (linear gradient up to 7 %) as eluent. Yield: ca. 80 %.

*5'-O-(4,4'-dimethoxytrityl)-N<sup>2</sup>-(dimethylaminomethylene)-2'-deoxy-2'-fluoroarabinoguanosine* (**6a**). <sup>1</sup>H NMR (500 MHz, dms<sub>o</sub>-d<sub>6</sub>), δ, ppm: 11.37 (s, 1H, NH), 8.53 (s, 1H, CH dmm), 7.92 (d, 1H, H-8), 7.74-6.83 (Ar-DMT), 6.84 (dd, 1H, H-1', J<sub>H1'-F</sub> = 16.39 Hz, J<sub>H1'-H2'</sub> = 4.38 Hz), 6.12 (s, 1H, 3'-OH), 5.19 (dt, 1H, H-2', J<sub>H2'-F</sub> = -52.19 Hz), 4.43 (m, 1H, H-3'), 3.99 (m, 1H, H-4'), 3.71 (s, 6H, CH<sub>3</sub>-DMT), 3.32-3.20 (m, 2H, H-5', H-5''), 3.10 (s, 3H, CH<sub>3</sub> dmm), 3.04 (s, 3H, CH<sub>3</sub> dmm); <sup>13</sup>C NMR (125 MHz, dms<sub>o</sub>-d<sub>6</sub>), δ, ppm: 162.98, 158.55, 158.13, 158.03, 150.25, 145.15, 137.61, 137.57, 135.91, 135.84, 130.13, 128.30, 128.09, 127.24, 119.28, 113.61, 96.43, 94.90, 85.97, 82.15, 82.11, 81.61, 81.48, 74.29, 74.10, 63.84, 55.48, 41.15, 40.22, 40.05, 39.97, 39.88, 39.80, 39.71, 39.55, 39.38, 39.21, 36.30, 35.15, 31.27; <sup>19</sup>F NMR (470 MHz, dms<sub>o</sub>-d<sub>6</sub>), δ, ppm: -197.28 (ddd, 1F, J<sub>H-F</sub> = 17.52 Hz, J<sub>F-H2'</sub> = -53.34 Hz); HRMS (ESI): calcd for C<sub>34</sub>H<sub>35</sub>FN<sub>6</sub>O<sub>6</sub> [M+H]<sup>+</sup> 643.2675; found 643.2676

*N<sup>6</sup>-benzoyl-5'-O-(4,4'-dimethoxytrityl)-2'-deoxy-2'-fluoroarabinoadenosine* (**6b**). <sup>1</sup>H NMR (500 MHz dms<sub>o</sub>-d<sub>6</sub>), δ, ppm: 11.27 (s, 1H, NH), 8.03-6.83 (m, Bz-Ar, DMT-Ar), 6.61 (dd, 1H, J<sub>H1'-F</sub> = 13.9 Hz, J<sub>H1'-H2'</sub> = 4.74 Hz), 6.04 (d, 3'-OH), 5.32 (dt, 1H, H-2', J<sub>H2'-F</sub> = -52.44 Hz), 4.57-4.51 (m, 1H, H-3'), 4.07 (m, 1H, H-4'), 3.72 (s, 6H, CH<sub>3</sub>-DMT), 3.41-3.37, 3.28-3.26 (m, 2H, H-5', H-5''); <sup>13</sup>C NMR (125 MHz dms<sub>o</sub>-d<sub>6</sub>), δ, ppm: 167.90, 165.65, 158.10, 151.92, 150.50, 144.74, 142.90, 135.53, 135.39, 134.25, 133.30, 132.48, 131.19, 129.71, 129.69, 128.51,

128.47, 128.30, 128.18, 127.81, 127.68, 127.44, 126.72, 125.08, 113.18, 96.33, 94.42, 85.55, 81.74, 81.66, 81.49, 73.69, 73.45, 63.38, 55.01, 39.50;  $^{19}\text{F}$  NMR (470 MHz, dms $\text{o-d}_6$ ),  $\delta$ , ppm: -197.68 (ddd, 1F,  $J_{\text{H-F}} = 17.11$  Hz,  $J_{\text{H}_2'\text{-F}} = -53.14$  Hz); HRMS (ESI): calcd for  $\text{C}_{38}\text{H}_{34}\text{FN}_5\text{O}_6$   $[\text{M}+\text{H}]^+$  676.2566; found 676.2572

*N*<sup>2</sup>,*N*<sup>6</sup>-diacetyl-5'-*O*-(4,4'-dimethoxytrityl)-2'-deoxy-2'-fluoro-2-aminoarabinoadenosine (**6c**).

$^1\text{H}$  NMR (400 MHz, dms $\text{o-d}_6$ ),  $\delta$ , ppm: 10.60, 10.35 (2xs, 2H, NH), 8.22 (1H, H-8), 7.38 - 6.79 (m, 9H, Ar-DMT), 6.43 (dd, 1H, H-1',  $J_{\text{H}_1'\text{-F}} = 13.36$  Hz,  $J_{\text{H}_1'\text{-H}_2'} = 4.84$  Hz), 5.96 (d, 1H, 3'-OH), 5.27 (dt, 1H, H-2',  $J_{\text{H-F}} = -52.47$  Hz), 4.65 (m, 1H, H-3'), 4.04 (m, 1H, H-4'), 3.72 (s, 6H,  $\text{CH}_3$ -DMT), 3.48-3.44, 3.24-3.21 (m, 2H, H-5', H-5''), 2.32 (s, 3H, Ac  $\text{CH}_3$ ), 2.20 (s, 3H, Ac  $\text{CH}_3$ );  $^{13}\text{C}$  NMR (100 MHz, dms $\text{o-d}_6$ ),  $\delta$ , ppm: 162.79, 158.35, 157.93, 157.83, 150.06, 144.96, 135.71, 135.65, 129.93, 128.10, 127.90, 127.04, 119.08, 113.42, 96.23, 94.71, 85.77, 81.95, 81.91, 81.42, 81.28, 74.09, 73.90, 63.64, 55.28, 40.95 - 39.02, 36.11, 34.95, 31.07;  $^{19}\text{F}$  NMR (376 MHz, dms $\text{o-d}_6$ ):  $\delta$  -198.05 (ddd, 1F,  $J_{\text{F-H}_2'} = -52.10$  Hz,  $J_{\text{F-H}} = 16.09$  Hz); HRMS (ESI): calcd for  $\text{C}_{35}\text{H}_{35}\text{FN}_6\text{O}_7$   $[\text{M}+\text{H}]^+$  671.2624; found 671.2634;

5'-*O*-(4,4'-dimethoxytrityl)-*N*<sup>2</sup>-(dimethylaminomethylene)-2'-deoxy-2'-fluoro-8-

bromoarabinoguanosine (**6d**).  $^1\text{H}$  NMR (400 MHz, dms $\text{o-d}_6$ ),  $\delta$ , ppm: 11.54 (s, 1H, NH), 8.23 (s, 1H, CH dmm), 7.35 - 6.77 (m, Ar-DMT), 6.48 (dd, 1H, H-1',  $J_{\text{H-F}} = 10.42$  Hz,  $J_{\text{H}_1'\text{-H}_2'} = 6.38$  Hz), 5.97 (s, 1H, 3'-OH), 5.34 (dt, 1H, H-2'), 4.72-4.65 (m, 1H, H-3'), 3.96 (m, 1H, H-4'), 3.72 (s, 6H,  $\text{CH}_3$ -DMT), 3.55 (m, 1H, H-5''), 3.24-3.17 (m, 1H, H-5'), 3.00 (s, 3H,  $\text{CH}_3$  dmm), 2.98 (s, 3H,  $\text{CH}_3$  dmm);  $^{13}\text{C}$  NMR (100 MHz, dms $\text{o-d}_6$ ),  $\delta$ , ppm: 158.50, 158.43, 157.97, 157.52, 156.80, 151.49, 145.23, 135.89, 135.83, 130.13, 130.01, 128.17, 128.12, 127.09, 121.83, 120.46, 113.53, 113.49, 97.39, 95.83, 85.94, 82.23, 82.09, 79.89, 79.80, 74.52, 74.35, 64.21, 55.48, 55.45, 49.07, 41.24, 40.57-39.47, 35.12;  $^{19}\text{F}$  NMR (376 MHz, dms $\text{o-d}_6$ ):  $\delta$  -197.31 (ddd, 1F,  $J_{\text{F-H}_2'} = -52.28$  Hz,  $J_{\text{F-H}} = 17.52$  Hz); HRMS (ESI): calcd for  $\text{C}_{34}\text{H}_{34}\text{BrFN}_6\text{O}_6$   $[\text{M}+\text{H}]^+$  721.1780; found 721.1773;

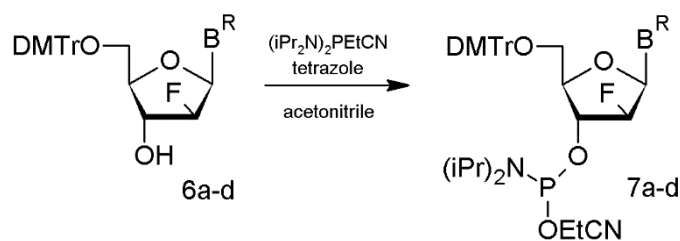

**N-protected [5'-O-(dimethoxytrityl)-2'-deoxy-2'-fluoroarabinofuranosyl]purine 3'-O-(2-cyanoethyl N,N-diisopropyl)phosphoramidite** (step vii). Dimethoxytrityl and base-protected purine riboside (**6**) (1 equiv) and tetrazole (1 equiv) was vacuum-dried for 8 h. Substrates were dissolved in anhydrous acetonitrile (5 ml per 1 mmol) and 2-cyanoethyl N,N,N',N'-tetraisopropylphosphorodiamidite (1.1 equiv) was added. The mixture was stirred at rt overnight. The reaction mixture after completion was worked up with an aqueous solution of sodium bicarbonate and extracted 3 times with dichloromethane containing 1 % of triethylamine (TEA). The combined organic layers were dried with sodium sulfate and evaporated. Product was purified using silica gel column chromatography starting with hexane, and ethyl acetate was used to form a gradient. During purification, the eluent contained 1 % TEA. Product (**7**) was lyophilized from benzene. Yield: 92 % (after purification).

*5'-O-(dimethoxytrityl)-N<sup>2</sup>-(dimethylaminomethylene)-2'-deoxy-2'-fluoroarabinoguanosine 3'-O-(2-cyanoethyl N,N-diisopropyl)phosphoramidite (7a)*. <sup>1</sup>H NMR (400 MHz, CD<sub>3</sub>CN-d<sub>3</sub>), δ, ppm: 9.49 (s, 1H, NH), 8.60 (s, 1H, CH dmm), 7.70 (s, 1H, H-8), 7.47-6.84 (13H, Ar-DMT), 6.34 (dd, 1H, H-1'), 5.23 (m, 1H, H-2'), 4.80-4.65 (m, 1H, H-3'), 4.15 (m, 1H, H-4'), 3.76 (s, 6H, CH<sub>3</sub>-DMT), 3.67-3.60 (m, 4H, O-CH<sub>2</sub> CEO, 2x CH iPr), 3.40-3.36 (m, 2H, H-5', 5''), 3.10 (s, 3H, CH<sub>3</sub> dmm), 3.05 (s, 3H, CH<sub>3</sub> dmm), 2.62 (t, 1H, CH<sub>2</sub> CEO), 2.52 (t, 1H, CH<sub>2</sub> CEO), 1.18-1.07 (13H, CH<sub>3</sub> iPr); <sup>13</sup>C NMR (100 MHz, CD<sub>3</sub>CN-d<sub>3</sub>), δ, ppm: 159.68, 159.33, 159.26, 158.78, 158.66, 158.62, 151.26, 151.24, 145.95, 145.92, 138.10, 138.06, 138.04, 138.01, 136.73, 136.68, 131.00, 130.96, 130.94, 129.27, 128.97, 128.90, 128.83, 127.87, 127.84, 120.43, 120.36, 119.39, 119.28, 118.27, 114.06, 96.67, 96.63, 96.61, 96.59, 94.75, 94.71, 94.69,

94.67, 87.13, 87.10, 83.24, 83.10, 83.07, 82.99, 82.93, 82.90, 82.82, 82.78, 82.74, 77.77, 77.60, 77.51, 77.34, 77.00, 76.82, 76.74, 76.57, 63.94, 63.72, 59.94, 59.77, 59.75, 59.58, 59.16, 59.11, 55.89, 55.88, 45.99, 45.92, 44.27, 44.20, 44.15, 44.07, 41.65, 35.30, 24.94, 24.90, 24.87, 24.83, 24.80, 24.73, 23.16, 23.14, 23.09, 23.07, 20.99, 20.94, 20.92, 20.87, 20.61, 20.53, 1.30;  $^{19}\text{F}$  NMR (470 MHz,  $\text{CD}_3\text{CN-d}_3$ ),  $\delta$ , ppm: -197.17 (dddd, 1F,  $J_{\text{H}2'-\text{F}} = -52.46$  Hz,  $J_{\text{H-F}} = 18.83$  Hz,  $J_{\text{P-F}} = 78,49$  Hz);  $^{31}\text{P}$  NMR (162 MHz  $\text{CD}_3\text{CN-d}_3$ ):  $\delta$ , ppm: 151.27, 150.82; HRMS (ESI): calcd for  $\text{C}_{43}\text{H}_{52}\text{FN}_8\text{O}_7\text{P}$   $[\text{M}+\text{H}]^+$  843.3753; found 843.3741;

*5'-O-(dimethoxytrityl)-N<sup>6</sup>-benzoyl-2'-deoxy-2'-fluoroarabinoadenosine* *3'-O-(2-cyanoethyl N,N-diisopropyl)phosphoramidite (7b)*.  $^1\text{H}$  NMR (500 MHz,  $\text{CD}_3\text{CN-d}_3$ ),  $\delta$ , ppm: 9.51 (s, 1H, NH), 8.67 - 8.66 (1H, H-2), 8.29-8.27 (1H, H-8), 8.03-6.85 (18H, Bz-Ar, DMT-Ar), 6.61-6.57 (m, 1H, H-1'), 5.47 - 5.32 (m, 1H, H-2'), 4.93-4.82 (m, 1H, H-3'), 4.27-4.25 (m, 1H, H-4'), 4.14-3.63 (m, 4H, H-5', H-5''), 3.77 (s, 6H,  $\text{CH}_3$ -DMT), 2.66 (t, 1H,  $\text{CH}_2$  CEO), 2.56 (t, 1H,  $\text{CH}_2$  CEO), 1.26-1.07 (13H,  $\text{CH}_3$  iPr);  $^{13}\text{C}$  NMR (125 MHz,  $\text{CD}_3\text{CN-d}_3$ ),  $\delta$ , ppm: 159.29, 159.28, 145.53, 145.51, 143.19, 136.32, 136.30, 136.27, 133.14, 130.60, 129.22, 128.73, 128.42, 117.89, 113.64, 96.22, 96.19, 96.07, 94.68, 94.65, 94.53, 86.76, 83.15, 83.02, 82.93, 82.79, 82.70, 82.49, 77.11, 76.98, 76.91, 76.78, 76.28, 76.15, 76.08, 75.95, 63.49, 63.28, 59.47, 59.35, 59.32, 59.19, 55.48, 55.47, 45.58, 45.53, 43.83, 43.77, 43.74, 43.67, 24.51, 24.44, 24.42, 24.39, 24.36, 24.33, 22.76, 22.74, 22.69, 22.67, 20.57, 20.52, 20.47, 1.39, 1.23, 1.06-0.40;  $^{19}\text{F}$  NMR (470 MHz,  $\text{CD}_3\text{CN-d}_3$ ),  $\delta$ , ppm: -197.12 (dddd, 1F,  $J_{\text{H}2'-\text{F}} = -51.78$  Hz,  $J_{\text{H-F}} = 17.52$  Hz,  $J_{\text{P-F}} = 96,71$  Hz);  $^{31}\text{P}$  NMR (202 MHz,  $\text{CD}_3\text{CN-d}_3$ ),  $\delta$ , ppm: 151.03, 150.95; HRMS (ESI): calcd for  $\text{C}_{43}\text{H}_{52}\text{FN}_8\text{O}_7\text{P}$   $[\text{M}+\text{H}]^+$  876.3655; found 876.3641;

*N<sup>2</sup>,N<sup>6</sup>-diacetyl-5'-O-(dimethoxytrityl)-2'-deoxy-2'-fluoro-2'-aminoarabinoadenosine* *3'-O-(2-cyanoethyl N,N-diisopropyl)phosphoramidite (7c)*.  $^1\text{H}$  NMR (400 MHz,  $\text{CD}_3\text{CN-d}_3$ ),  $\delta$ , ppm: 8.74, 8.64 (2xs, 2H, NH), 8.07 (m, 1H, H-8), 7.43 - 6.78 (14H, Ar-DMT), 6.41-6.36 (m, 1H, H-1'), 5.43-5.25 (m, 1H, H-2'), 5.01-4.83 (m, 1H, H-3'), 4.19 (m, 1H, H-4'), 4.14-3.80 (m, 2H,

H-5', H-5''), 3.74 (s, 6H, CH<sub>3</sub>-DMT), 3.68-3.37 (m, 4H, O-CH<sub>2</sub> CEO, 2x CH iPr), 3.37 (m, 2H, H-5', 5''), 2.75 (t, 1H, CH<sub>2</sub> CEO), 2.63 (t, 1H, CH<sub>2</sub> CEO), 2.31 (1H, CH<sub>3</sub> Ac), 2.16 (1H, CH<sub>3</sub> Ac), 1.24-1.07 (12H, CH<sub>3</sub> iPr); <sup>13</sup>C NMR (100 MHz, CD<sub>3</sub>CN-d<sub>3</sub>), δ, ppm: 170.98, 159.64, 159.62, 159.60, 153.03, 150.62, 145.97, 136.79, 136.71, 136.69, 136.65, 131.05, 131.00, 130.94, 128.99, 128.91, 128.72, 127.79, 119.28, 118.25, 113.93, 87.06, 83.59, 83.42, 83.27, 83.19, 83.10, 64.12, 59.74, 59.65, 59.55, 59.46, 59.12, 59.07, 55.84, 45.91, 44.24, 44.19, 44.11, 44.07, 25.79, 25.29, 24.89, 24.84, 24.81, 24.77, 24.71, 24.68, 23.14, 23.12, 23.06, 23.05, 20.87, 1.89, 1.68, 1.48, 1.27, 1.06, 0.86, 0.65; <sup>19</sup>F NMR (376 MHz, CD<sub>3</sub>CN-d<sub>3</sub>), δ, ppm: -197.79 - -198.16 (m); <sup>31</sup>P NMR (162 MHz, CD<sub>3</sub>CN-d<sub>3</sub>), δ, ppm: 151.12, 150.96; HRMS (ESI): calcd for C<sub>43</sub>H<sub>52</sub>FN<sub>8</sub>O<sub>7</sub>P [M+H]<sup>+</sup> 871.3703; found 871.3711;

*5'-O-(dimethoxytrityl)-N<sup>2</sup>-(dimethylaminomethylene)-2'-deoxy-2'-fluoro-8-bromoarabinoguanosine 3'-O-(2-cyanoethyl N,N-diisopropyl)phosphoramidite (7d)*. <sup>1</sup>H NMR (500 MHz CD<sub>3</sub>CN-d<sub>3</sub>), δ, ppm: 9.77 (s, 1H, NH), 8.28, 8.25 (2xs, 1H, H-8), 7.41-6.72 (14H, Ar-DMT), 6.52-6.47 (m, 1H, H-1'), 5.51-5.35 (m, 1H, H-2'), 5.25-5.02 (m, 1H, H-3'), 4.15 (m, 1H, H-4'), 3.75 (s, 6H, CH<sub>3</sub>-DMT), 3.72-3.50 (m, 4H, O-CH<sub>2</sub> CEO, 2x CH iPr), 3.37 (m, 2H, H-5', 5''), 3.09 (s, 3H, CH<sub>3</sub> dmm), 3.04 (s, 3H, CH<sub>3</sub> dmm), 2.62 (t, 1H, CH<sub>2</sub> CEO), 2.52 (t, 1H, CH<sub>2</sub> CEO), 1.18-1.07 (12H, CH<sub>3</sub> iPr); <sup>13</sup>C NMR (400 MHz, CD<sub>3</sub>CN-d<sub>3</sub>), δ, ppm: 159.61, 159.54, 158.58, 158.51, 158.10, 158.03, 157.49, 152.53, 152.48, 146.01, 145.91, 136.70, 136.57, 136.53, 136.50, 130.99, 130.93, 130.77, 129.27, 128.90, 128.79, 128.77, 128.74, 127.79, 127.73, 122.56, 121.58, 119.32, 119.18, 118.27, 113.99, 113.97, 96.83, 95.25, 87.06, 87.03, 83.65, 83.50, 83.40, 83.26, 80.18, 80.14, 80.10, 80.06, 77.33, 77.16, 76.98, 64.61, 64.31, 59.99, 59.85, 59.56, 59.41, 55.89, 55.86, 44.35, 44.26, 44.18, 44.08, 41.81, 41.77, 35.35, 24.88, 24.82, 24.53, 24.47, 20.88, 20.82, 1.79, 1.62, 1.46, 1.29, 1.13, 0.96, 0.80; <sup>19</sup>F NMR (470 MHz, CD<sub>3</sub>CN-d<sub>3</sub>), δ, ppm: -197.77 - -197.97 (m); <sup>31</sup>P NMR (202 MHz, CD<sub>3</sub>CN-d<sub>3</sub>), δ, ppm: 152.21, 151.22; HRMS (ESI): calcd for [M+H]<sup>+</sup> 921.2858; found 921.2865;

### S4. NMR Spectra.

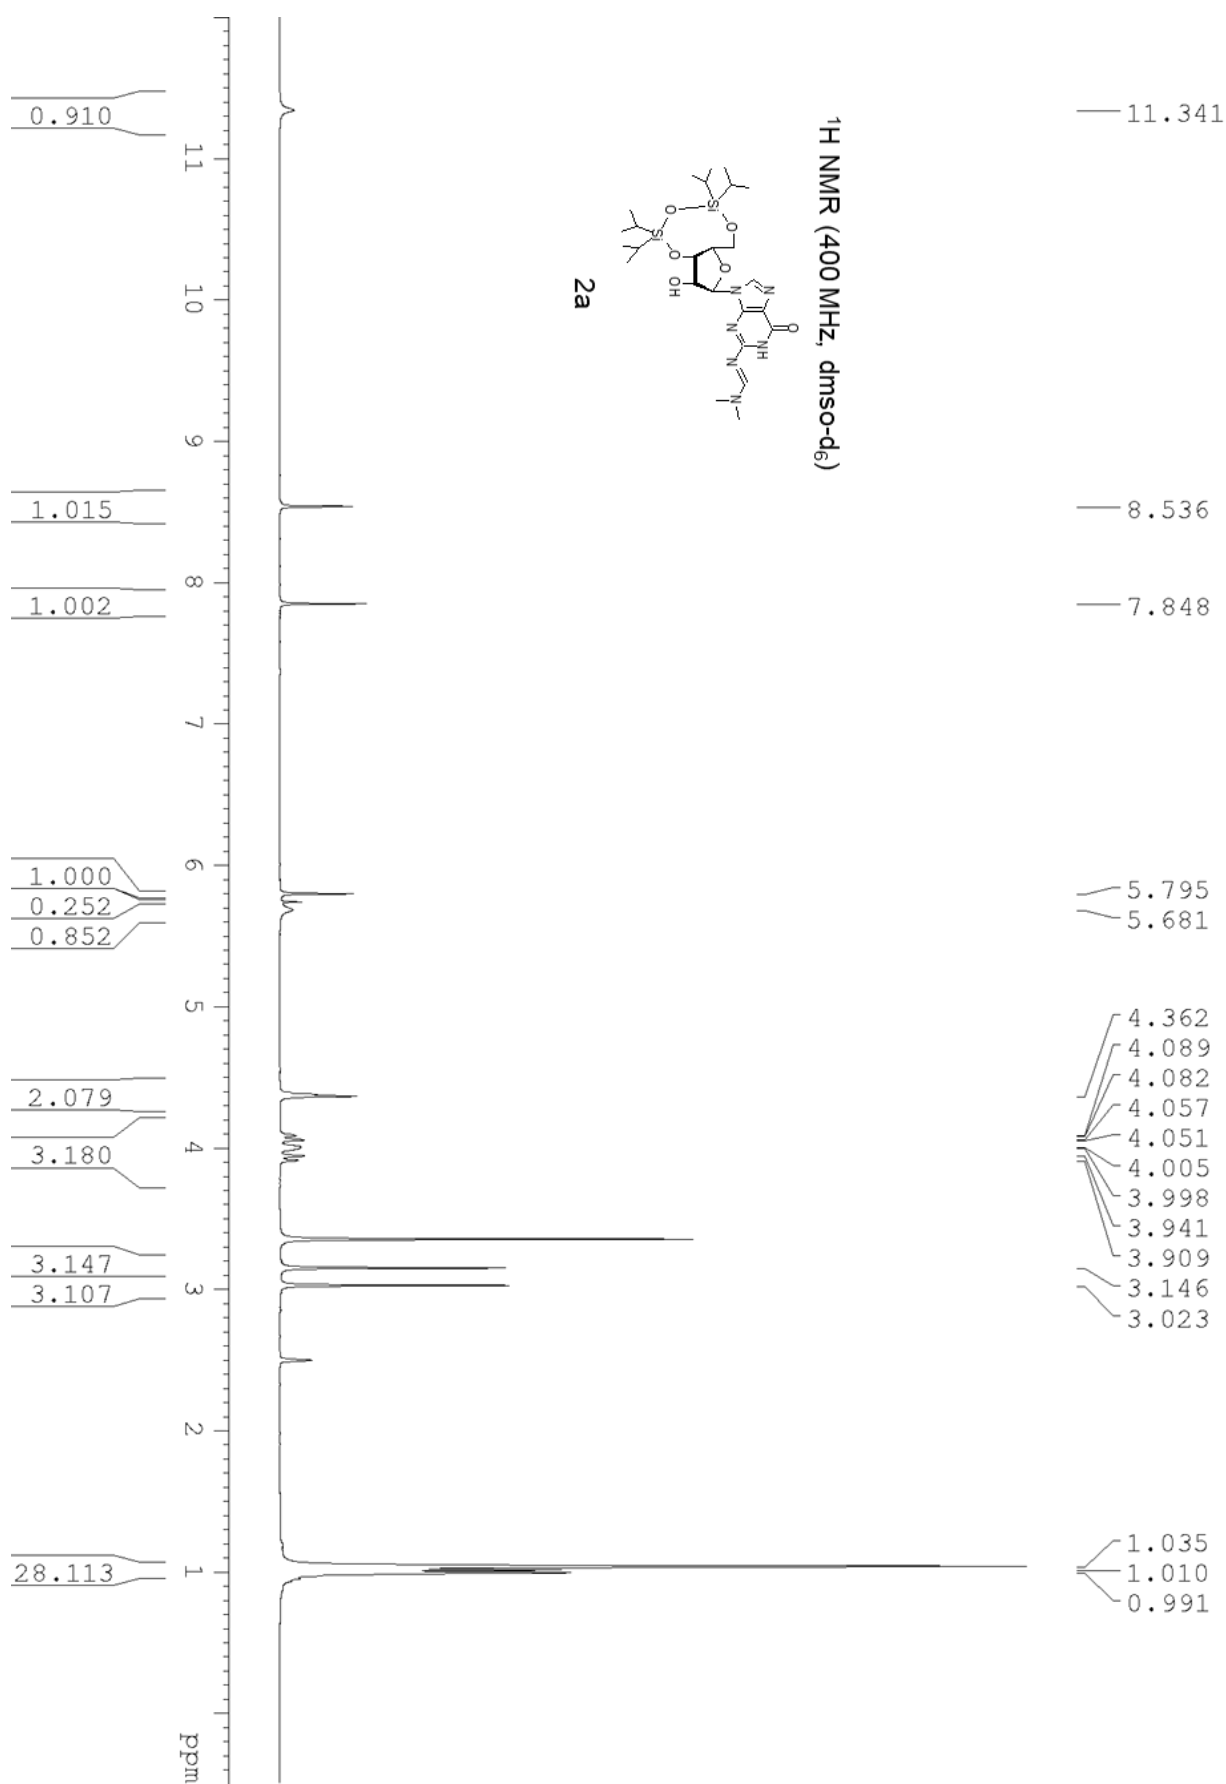



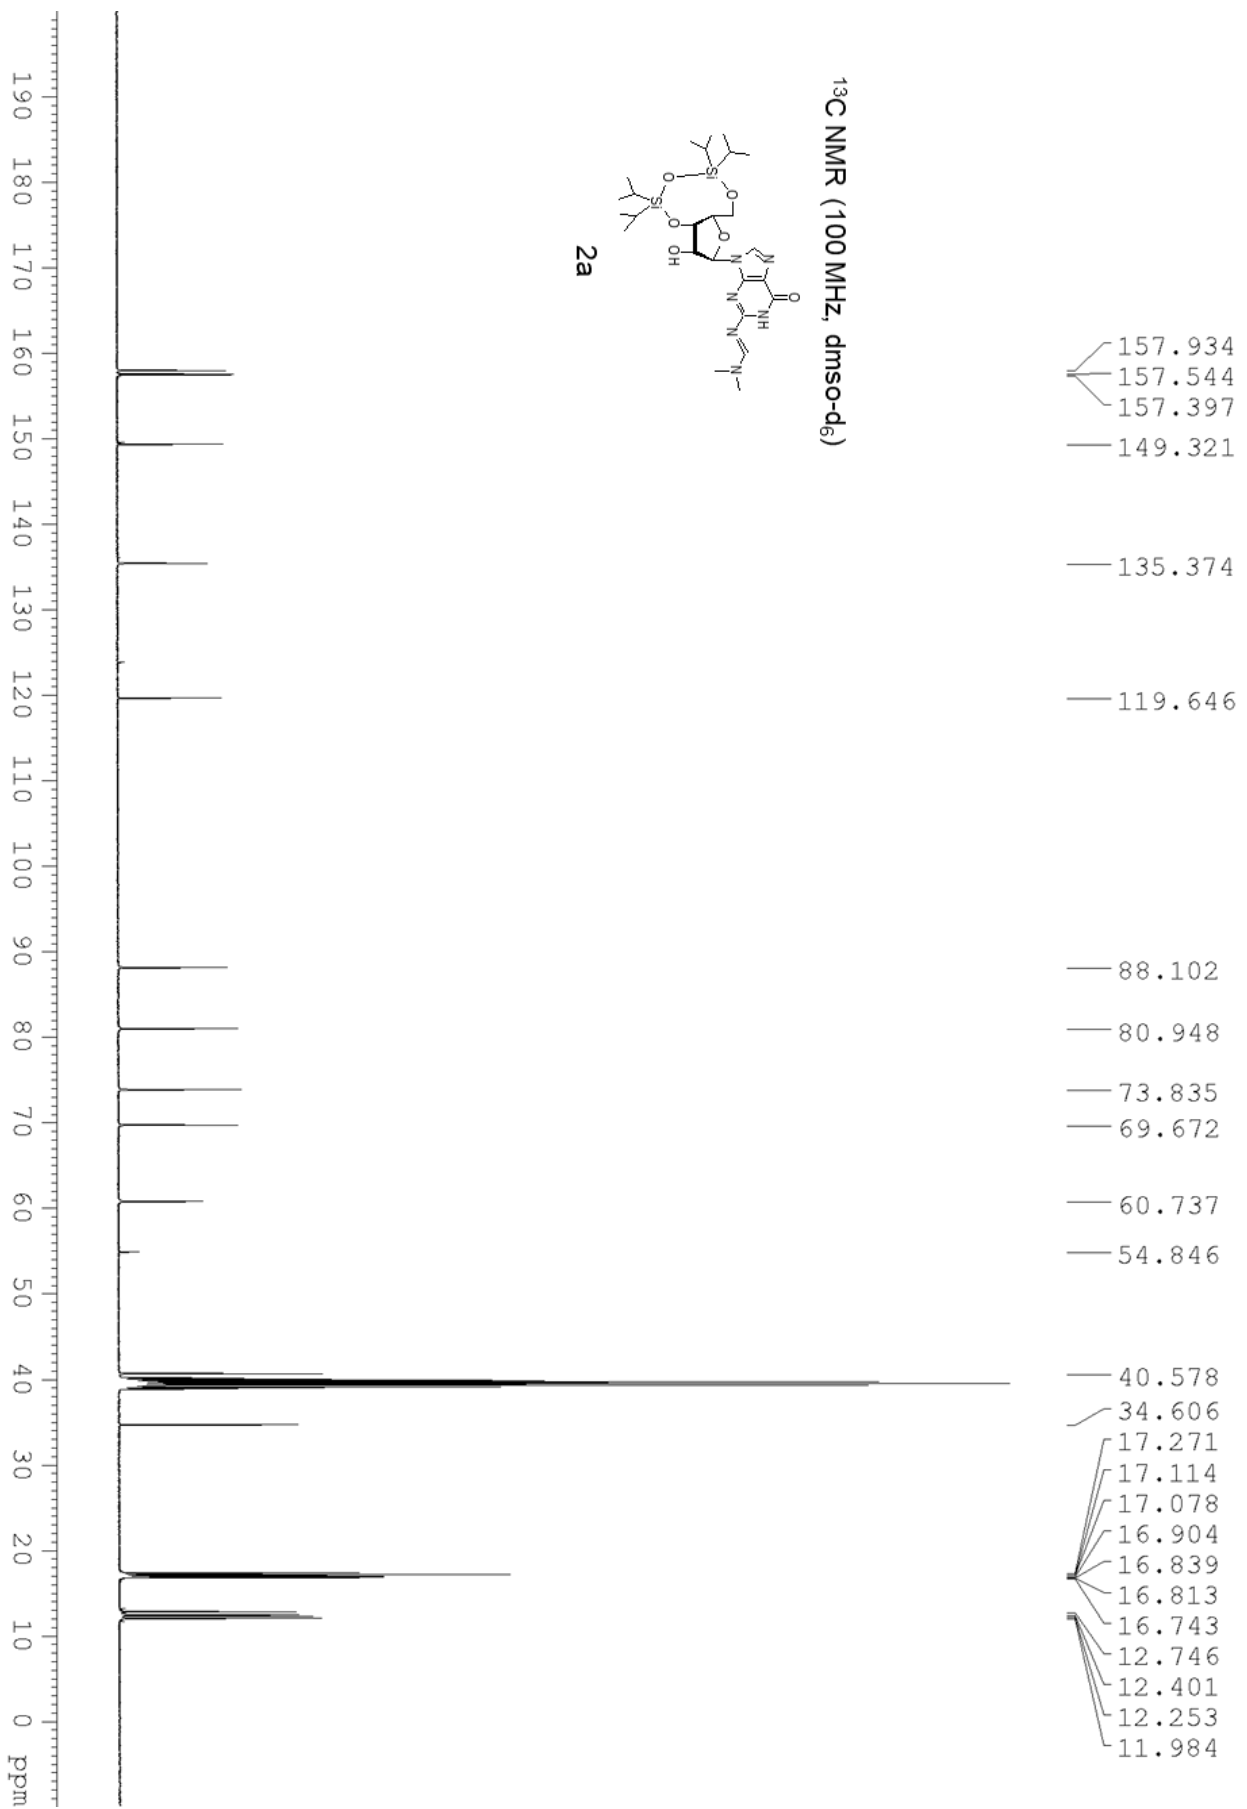



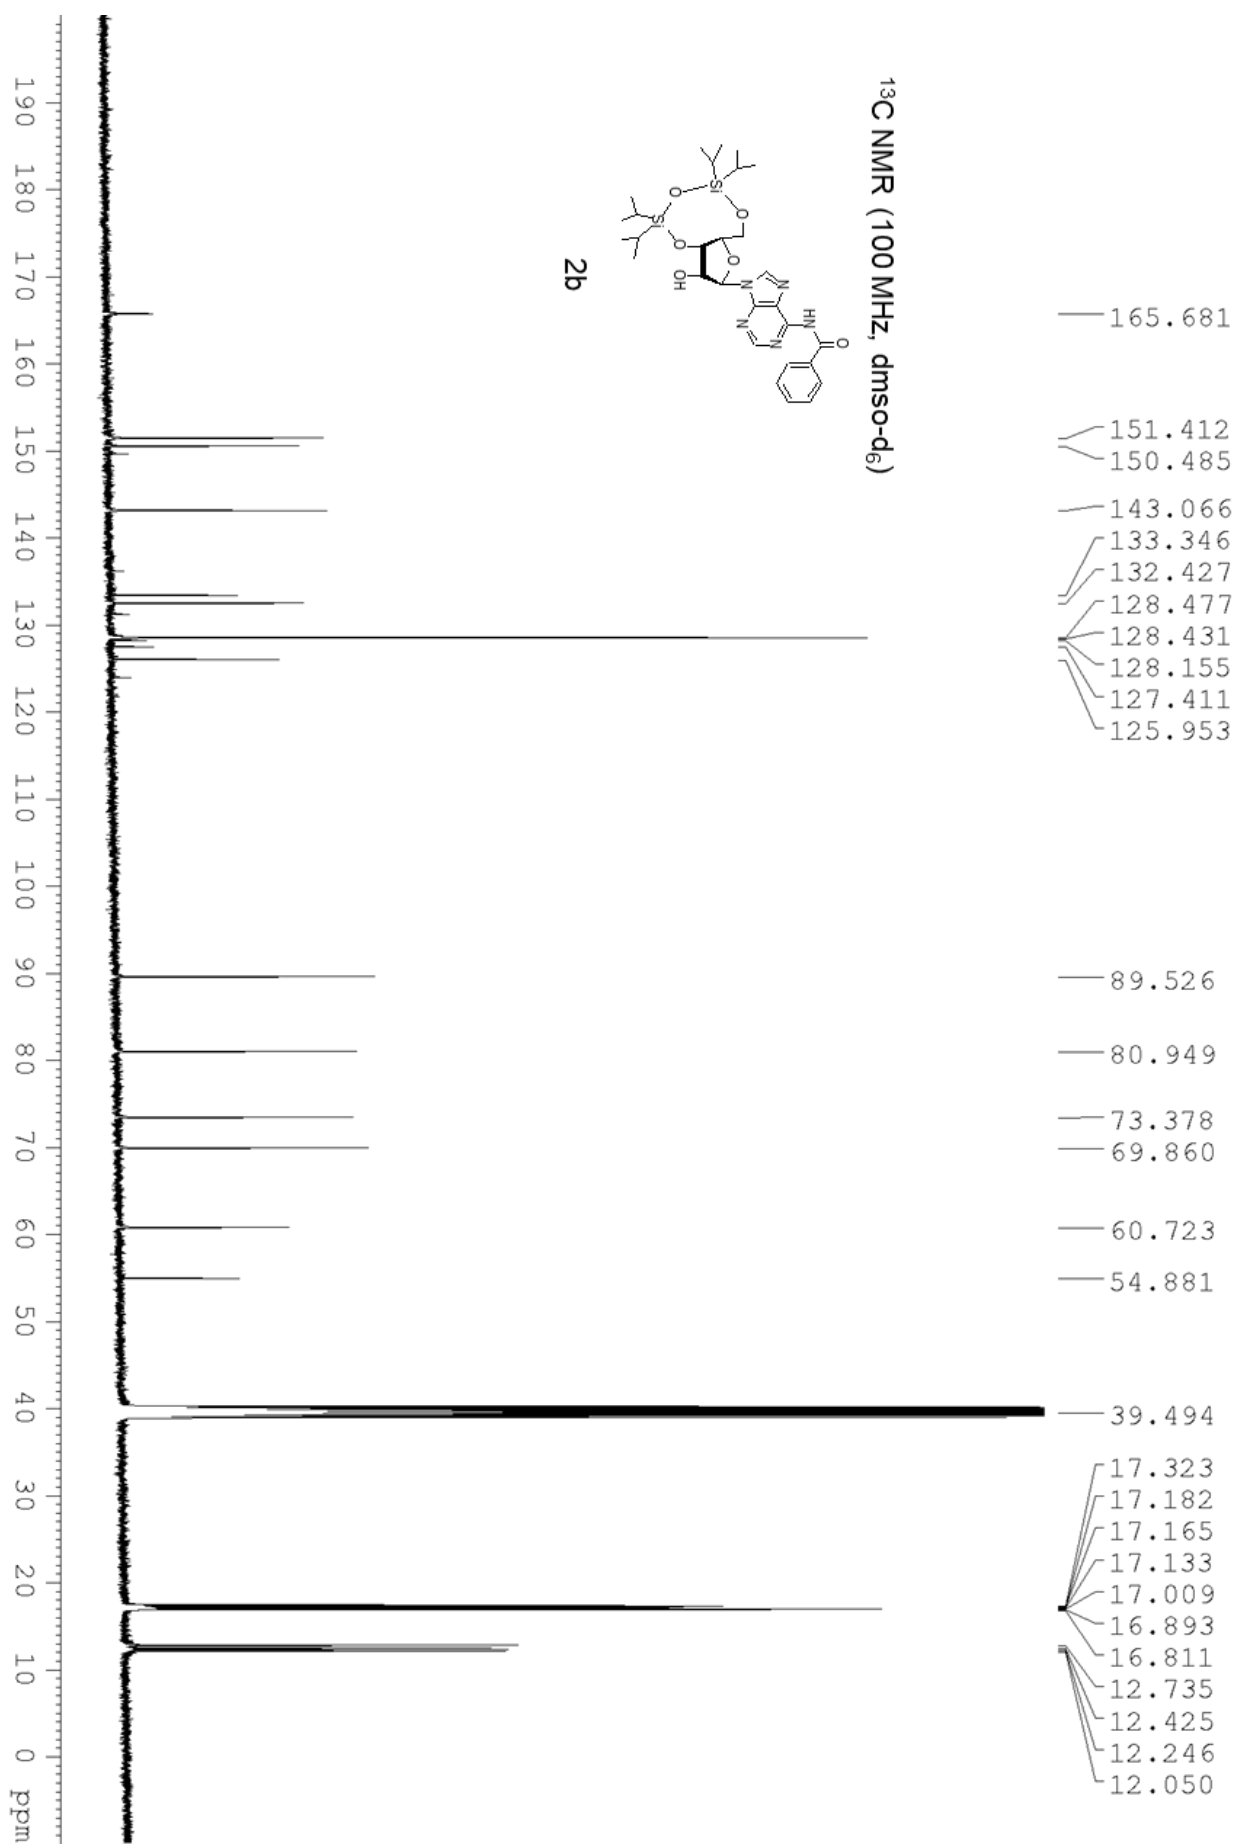

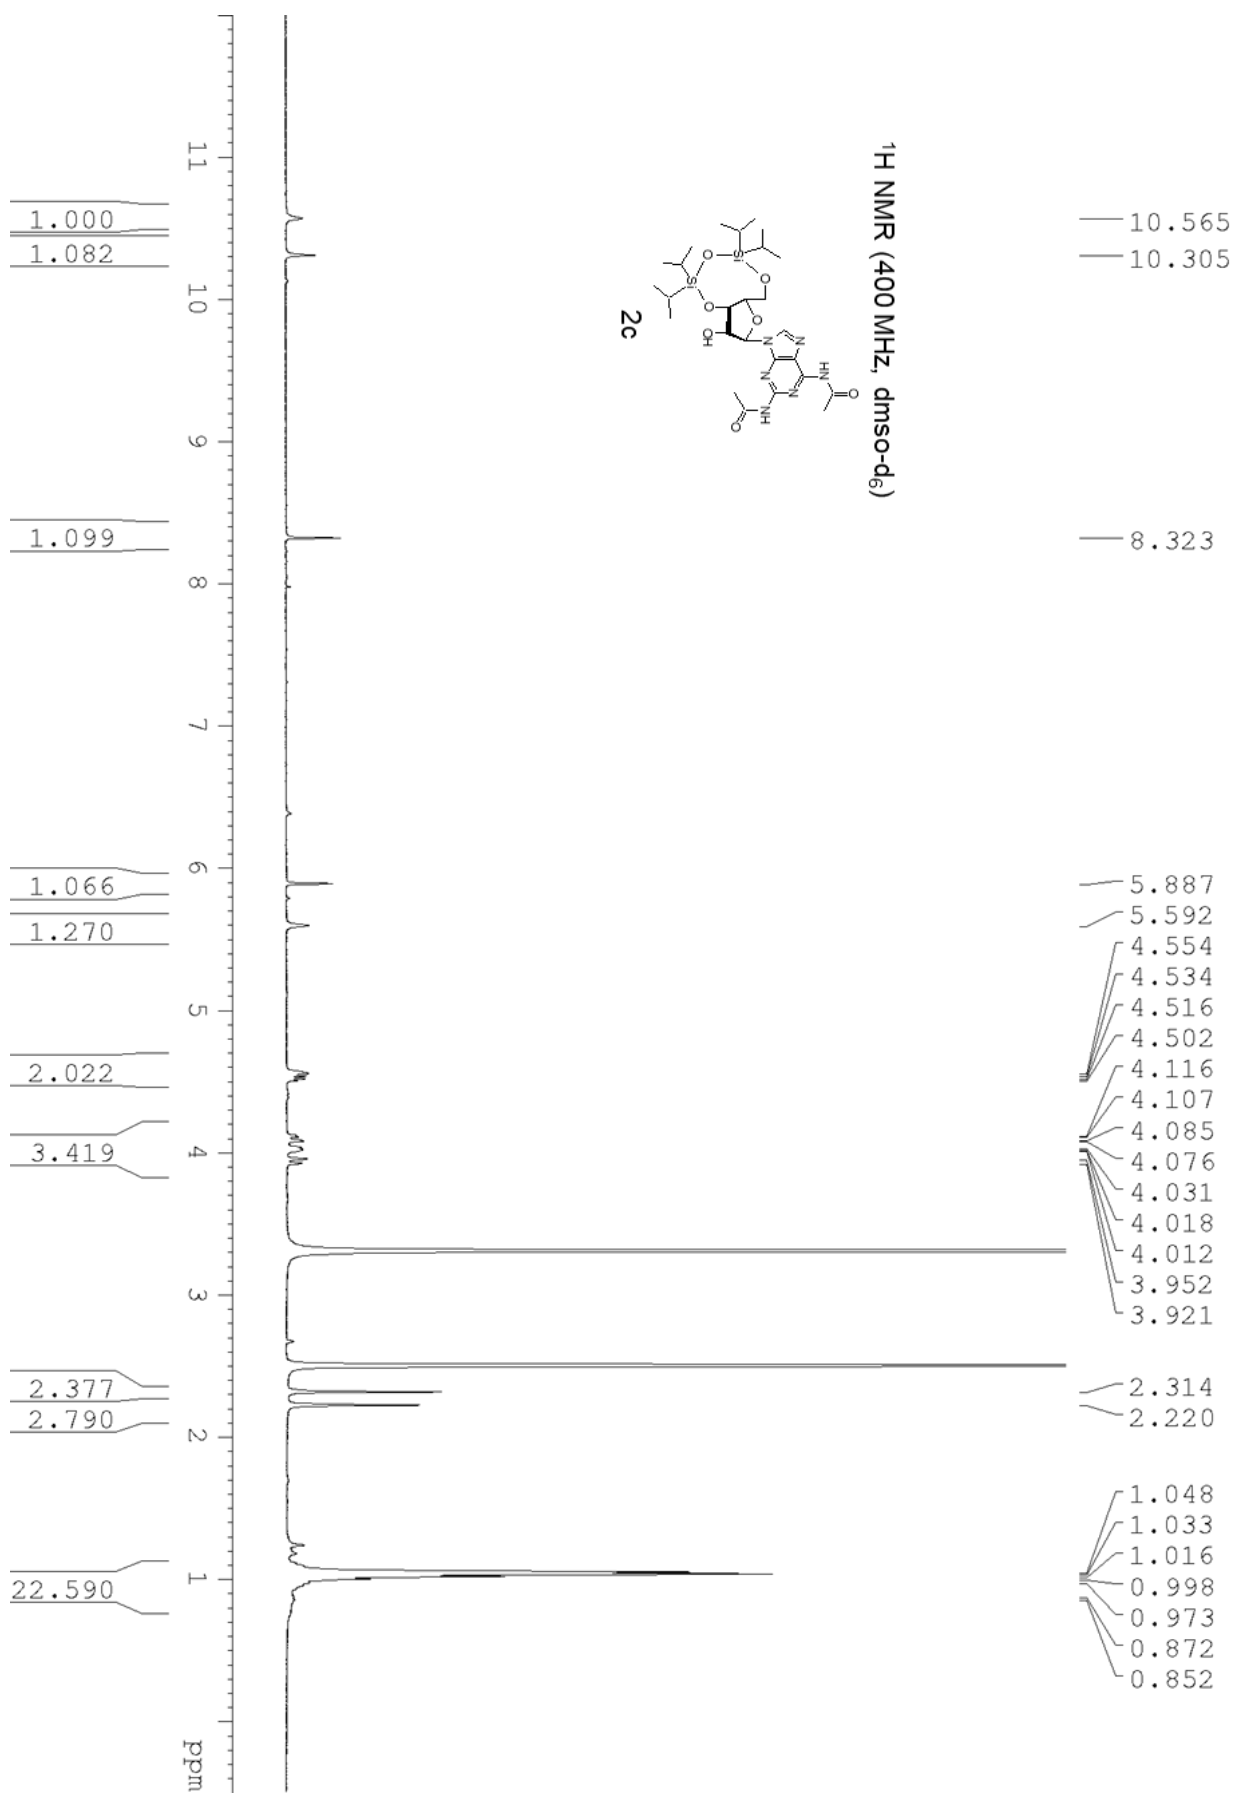

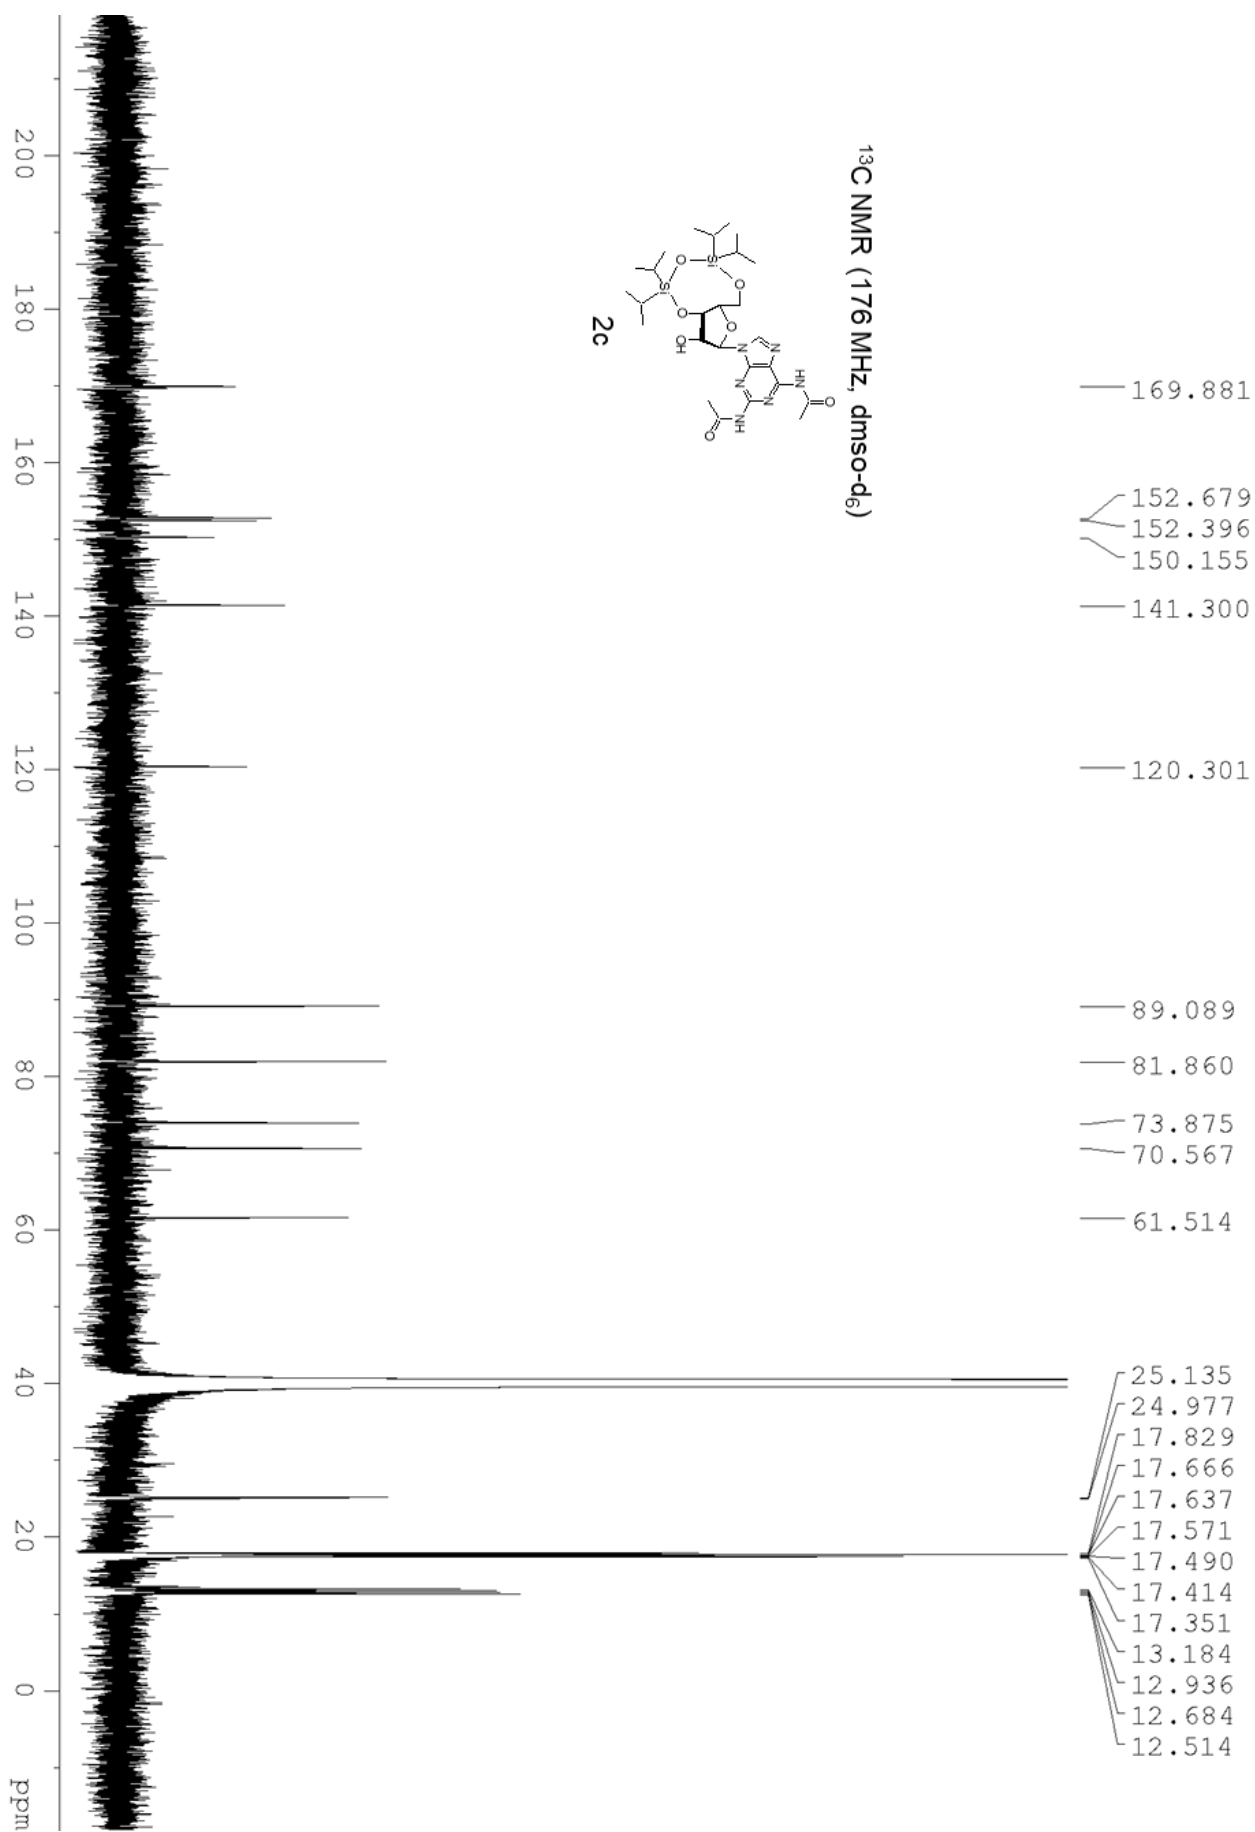

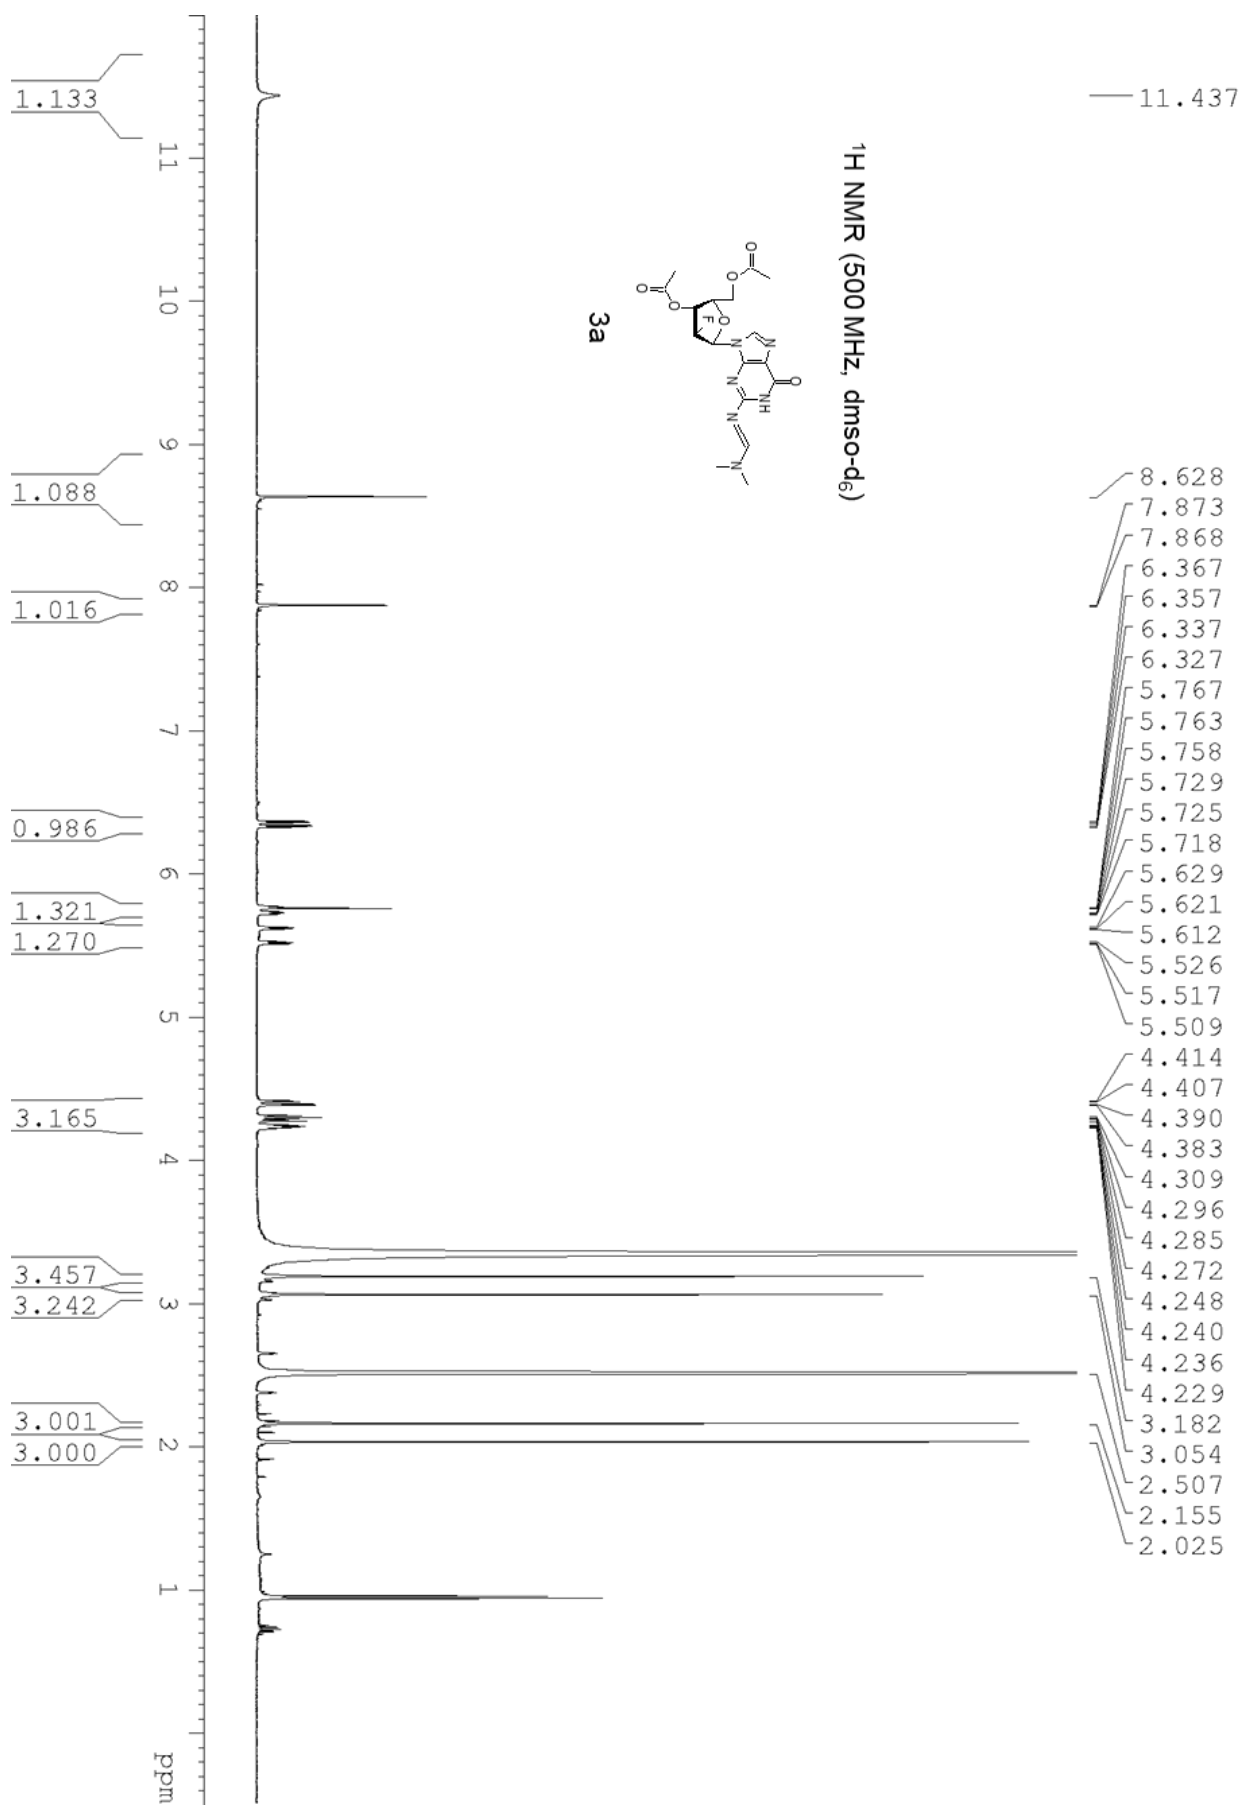

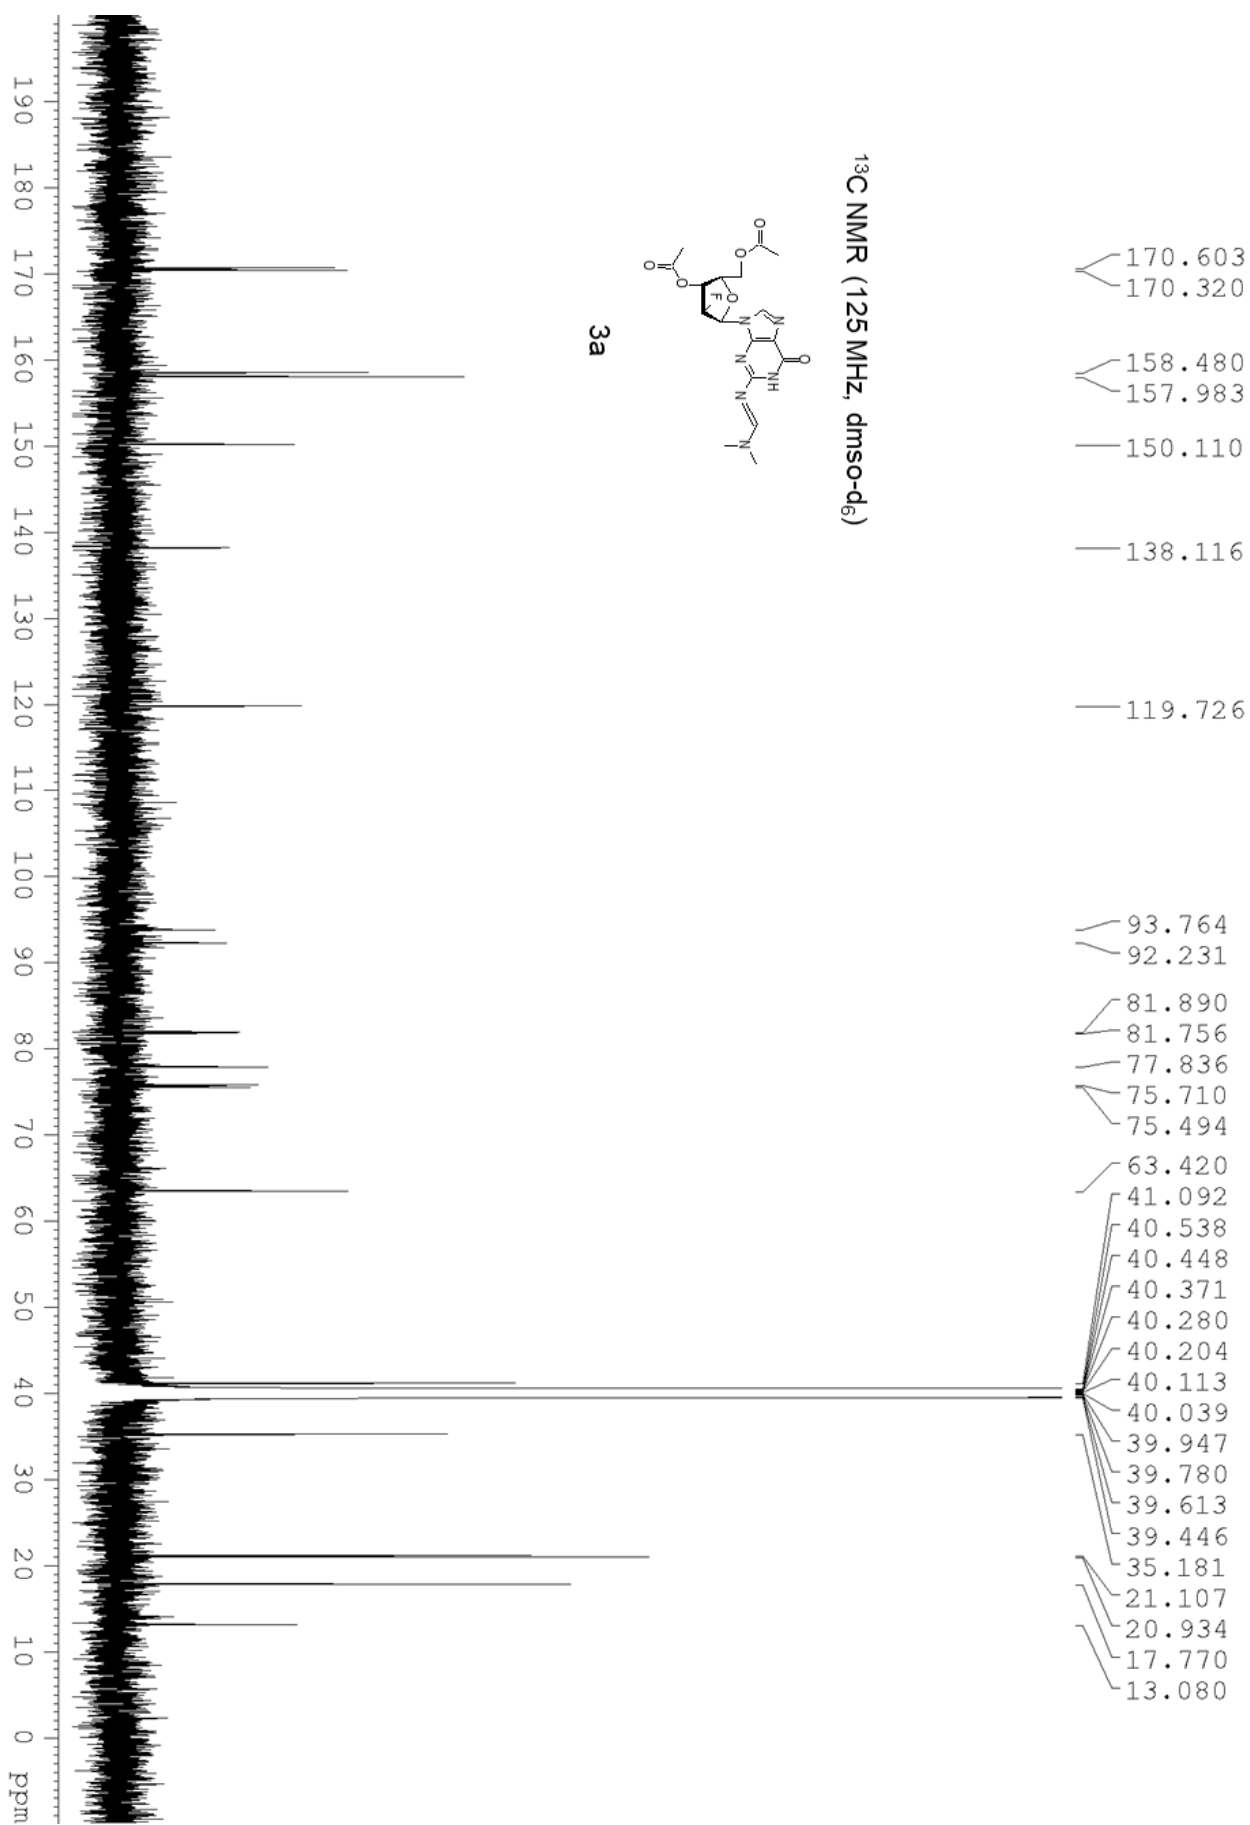

<sup>1</sup>F NMR (470 MHz, dms<sub>o</sub>-d<sub>6</sub>)

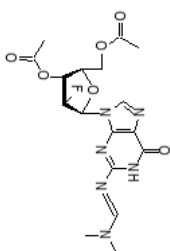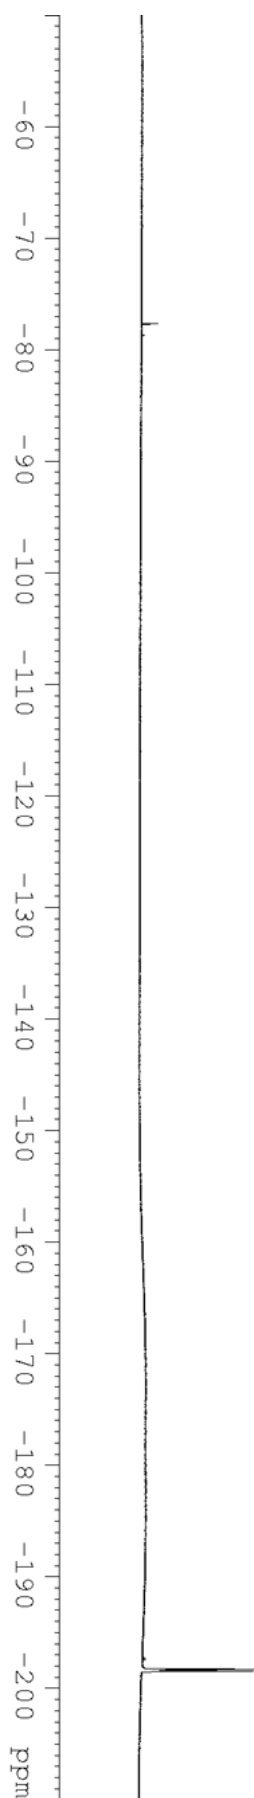

— -198.336  
— -198.381  
— -198.427  
— -198.472  
— -198.518  
— -198.563

— -198.336  
— -198.381  
— -198.427  
— -198.472  
— -198.518  
— -198.563



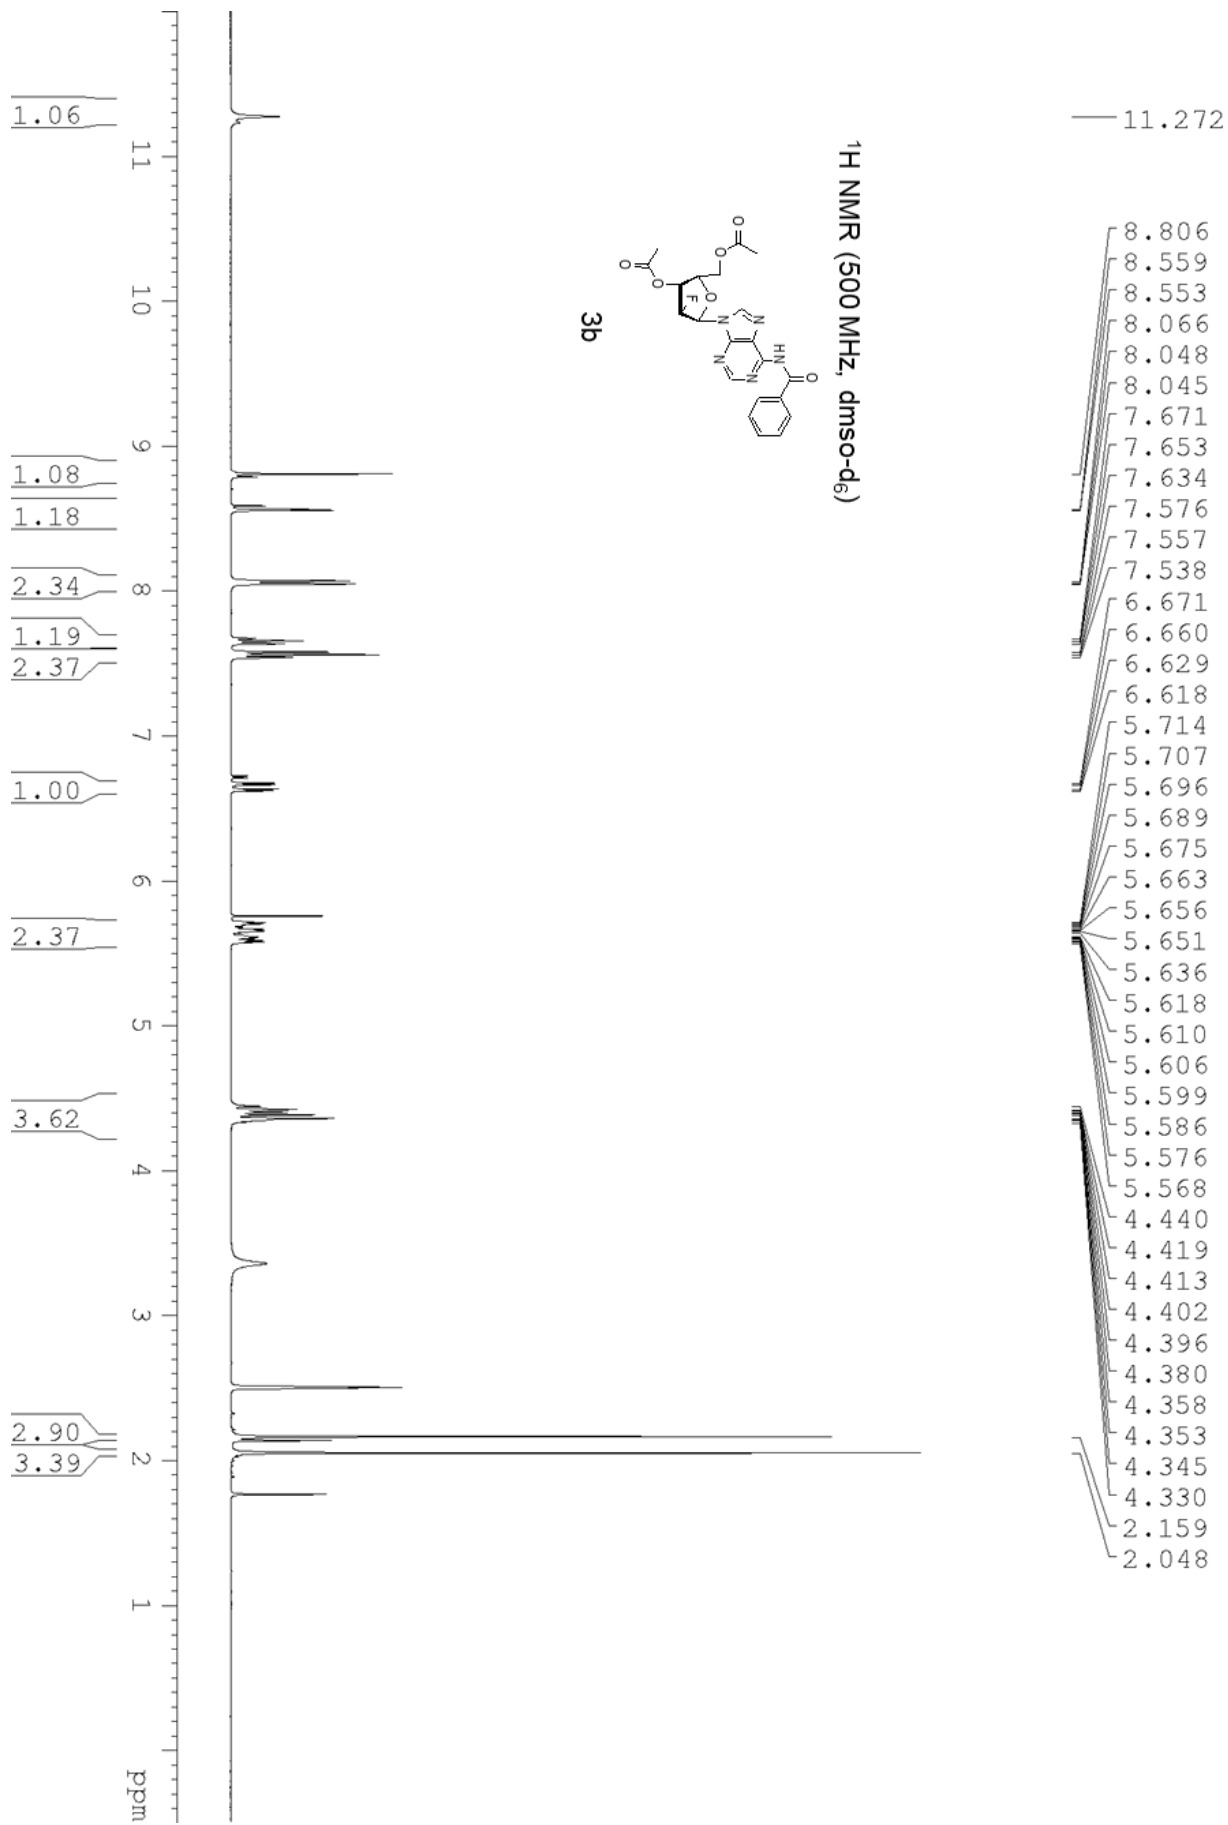

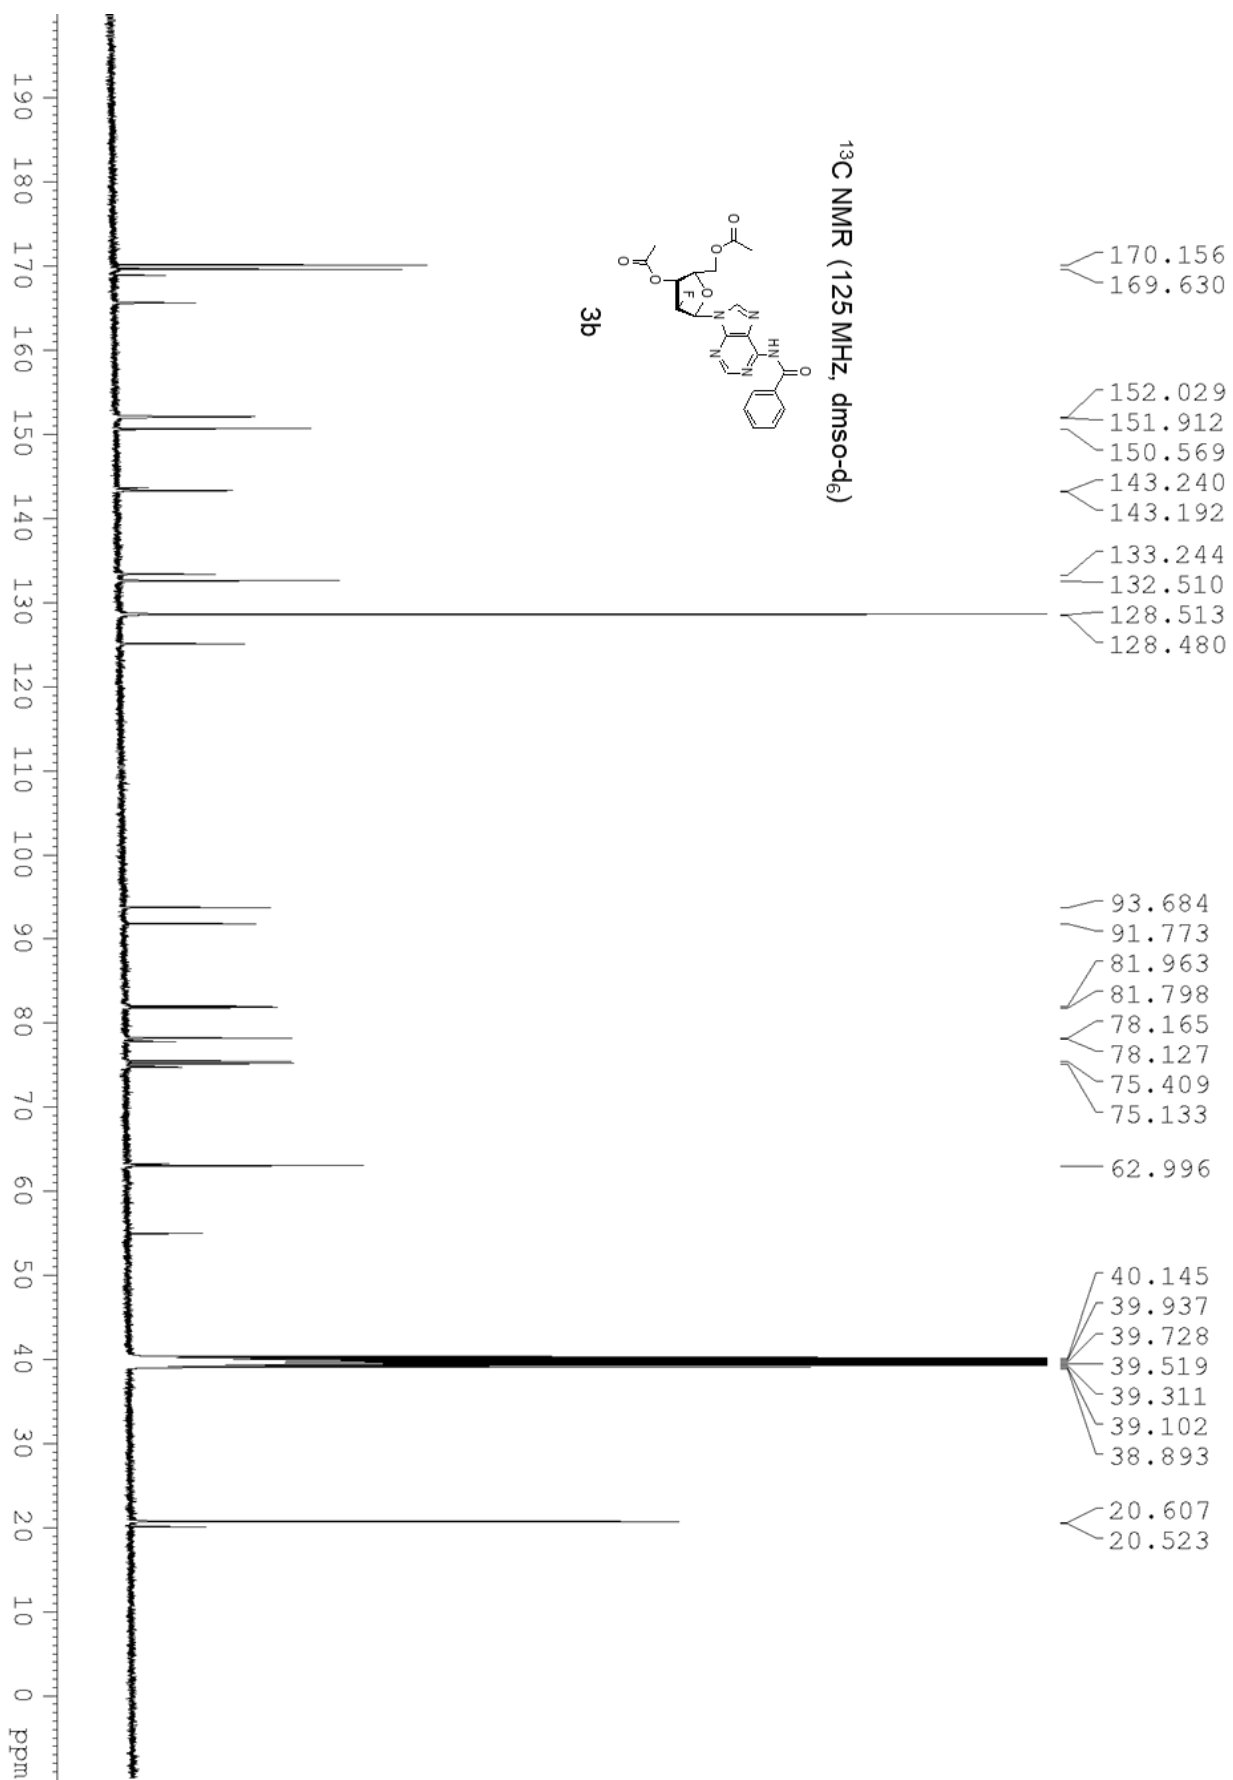

<sup>19</sup>F NMR (470MHz, dmso-d<sub>6</sub>)

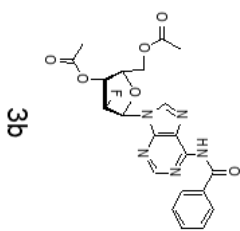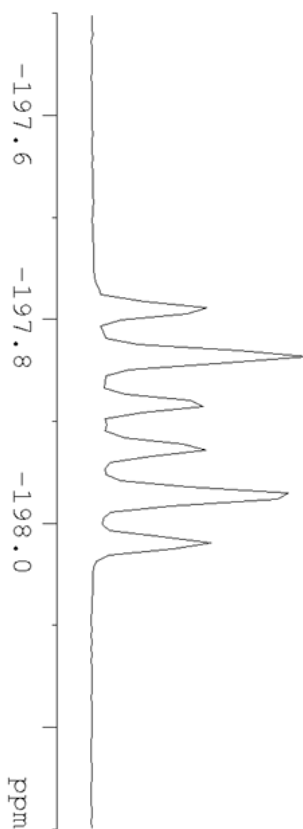

- 197.790
- 197.837
- 197.884
- 197.904
- 197.927
- 197.973
- 198.020

- 197.790
- 197.837
- 197.884
- 197.904
- 197.927
- 197.973
- 198.020

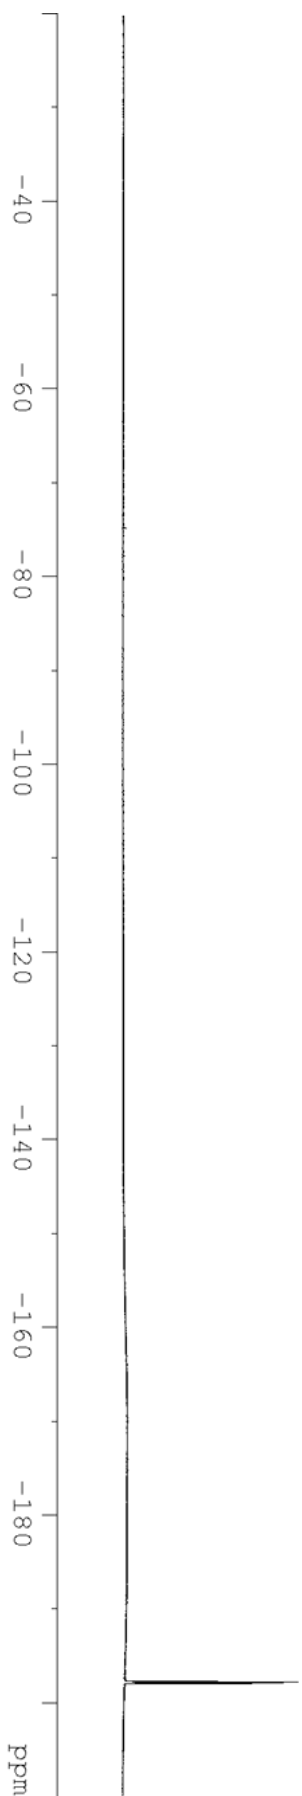

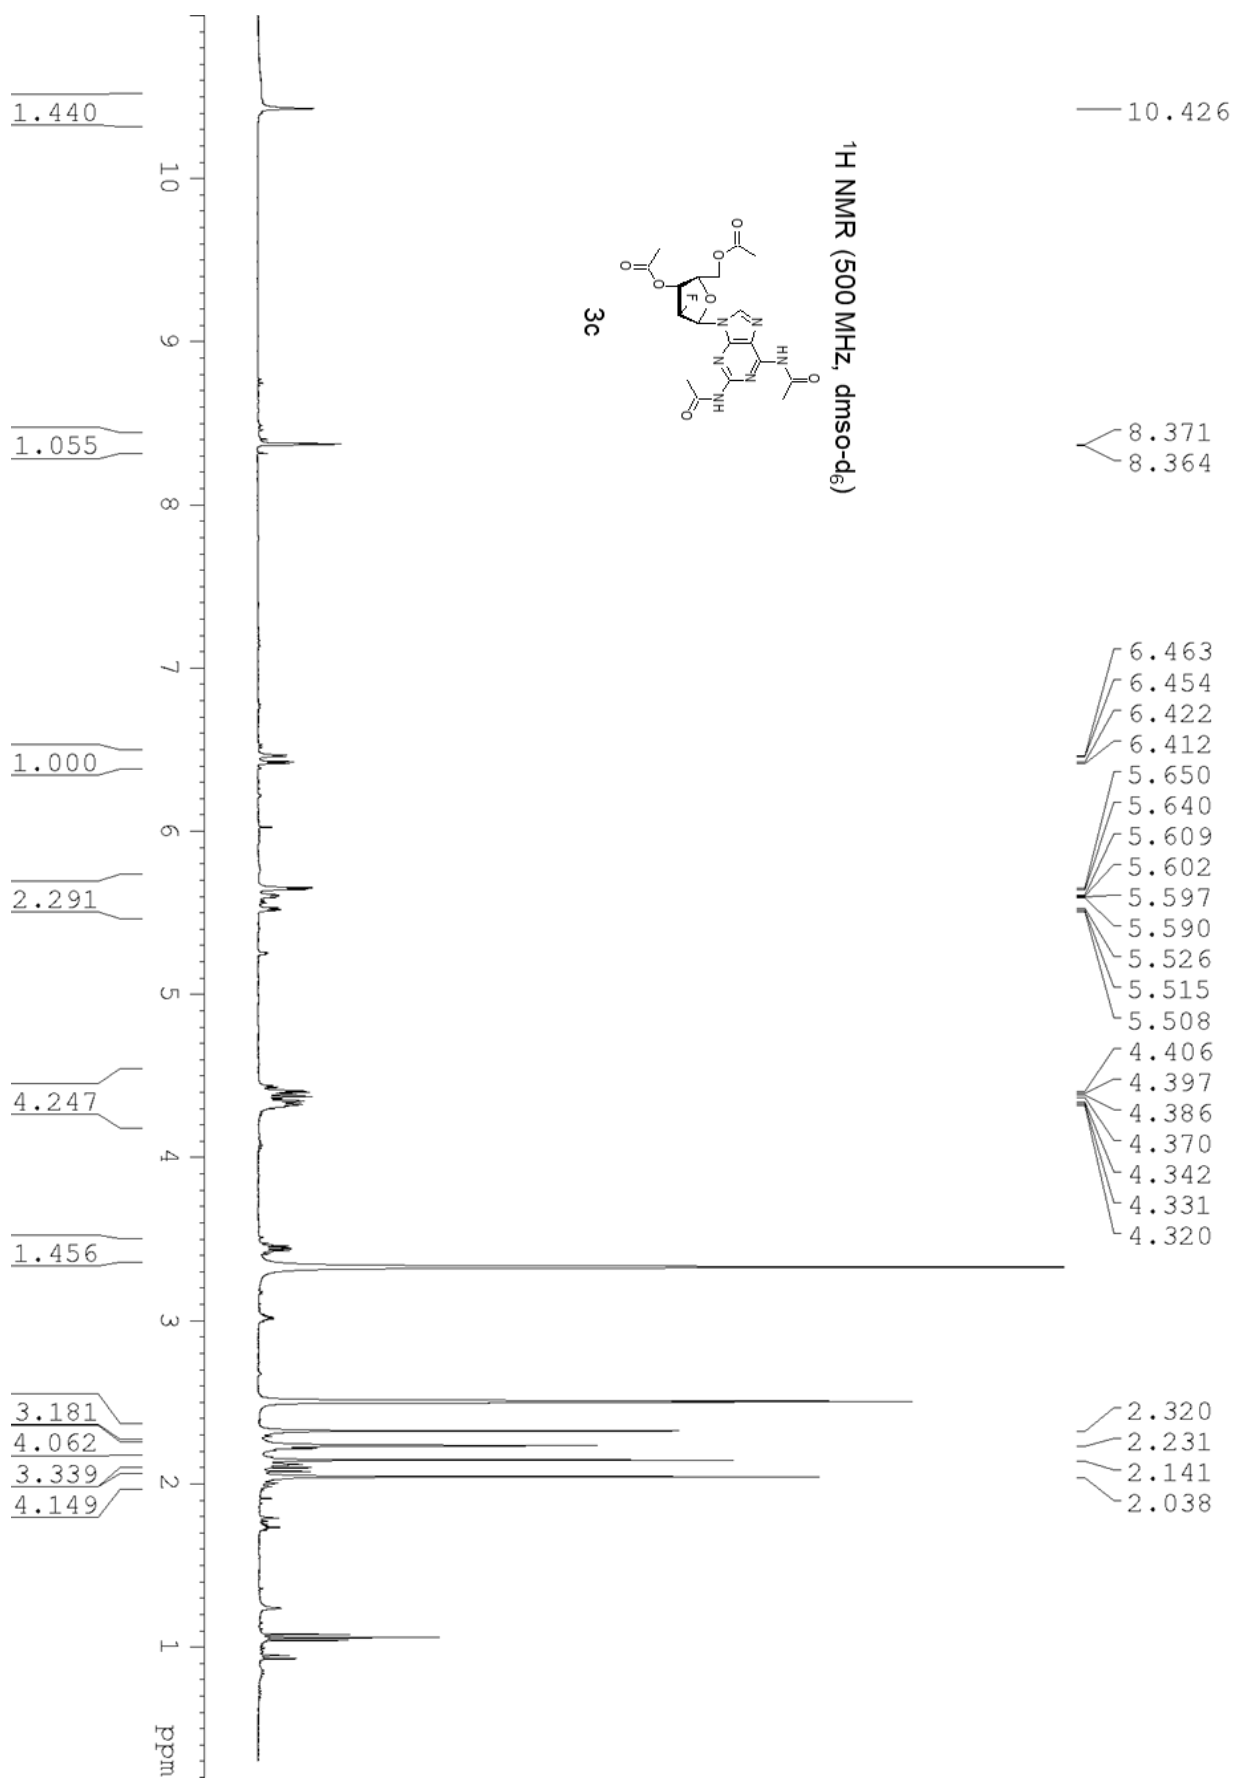

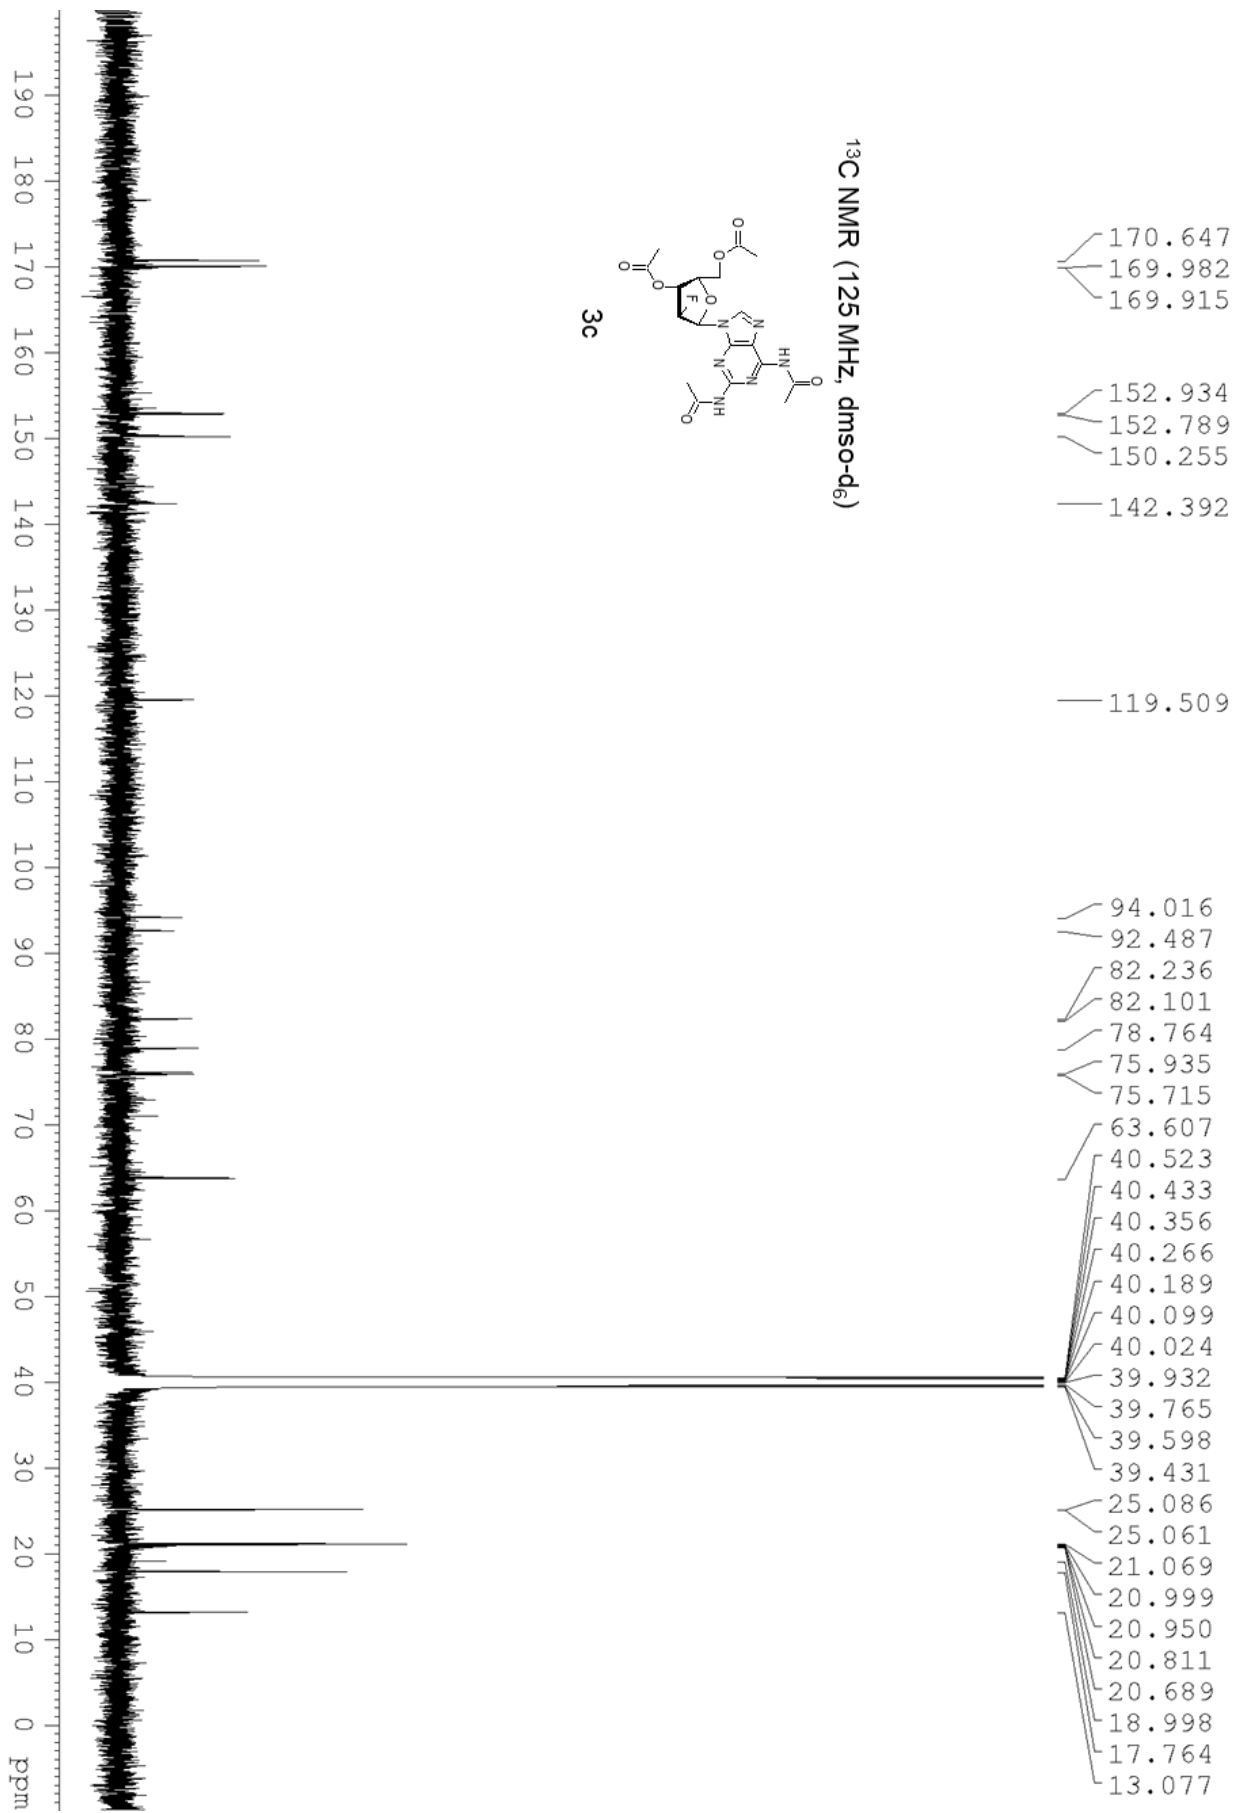

<sup>19</sup>F NMR (470 MHz, dms0-d<sub>6</sub>)

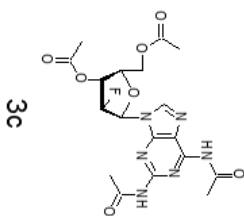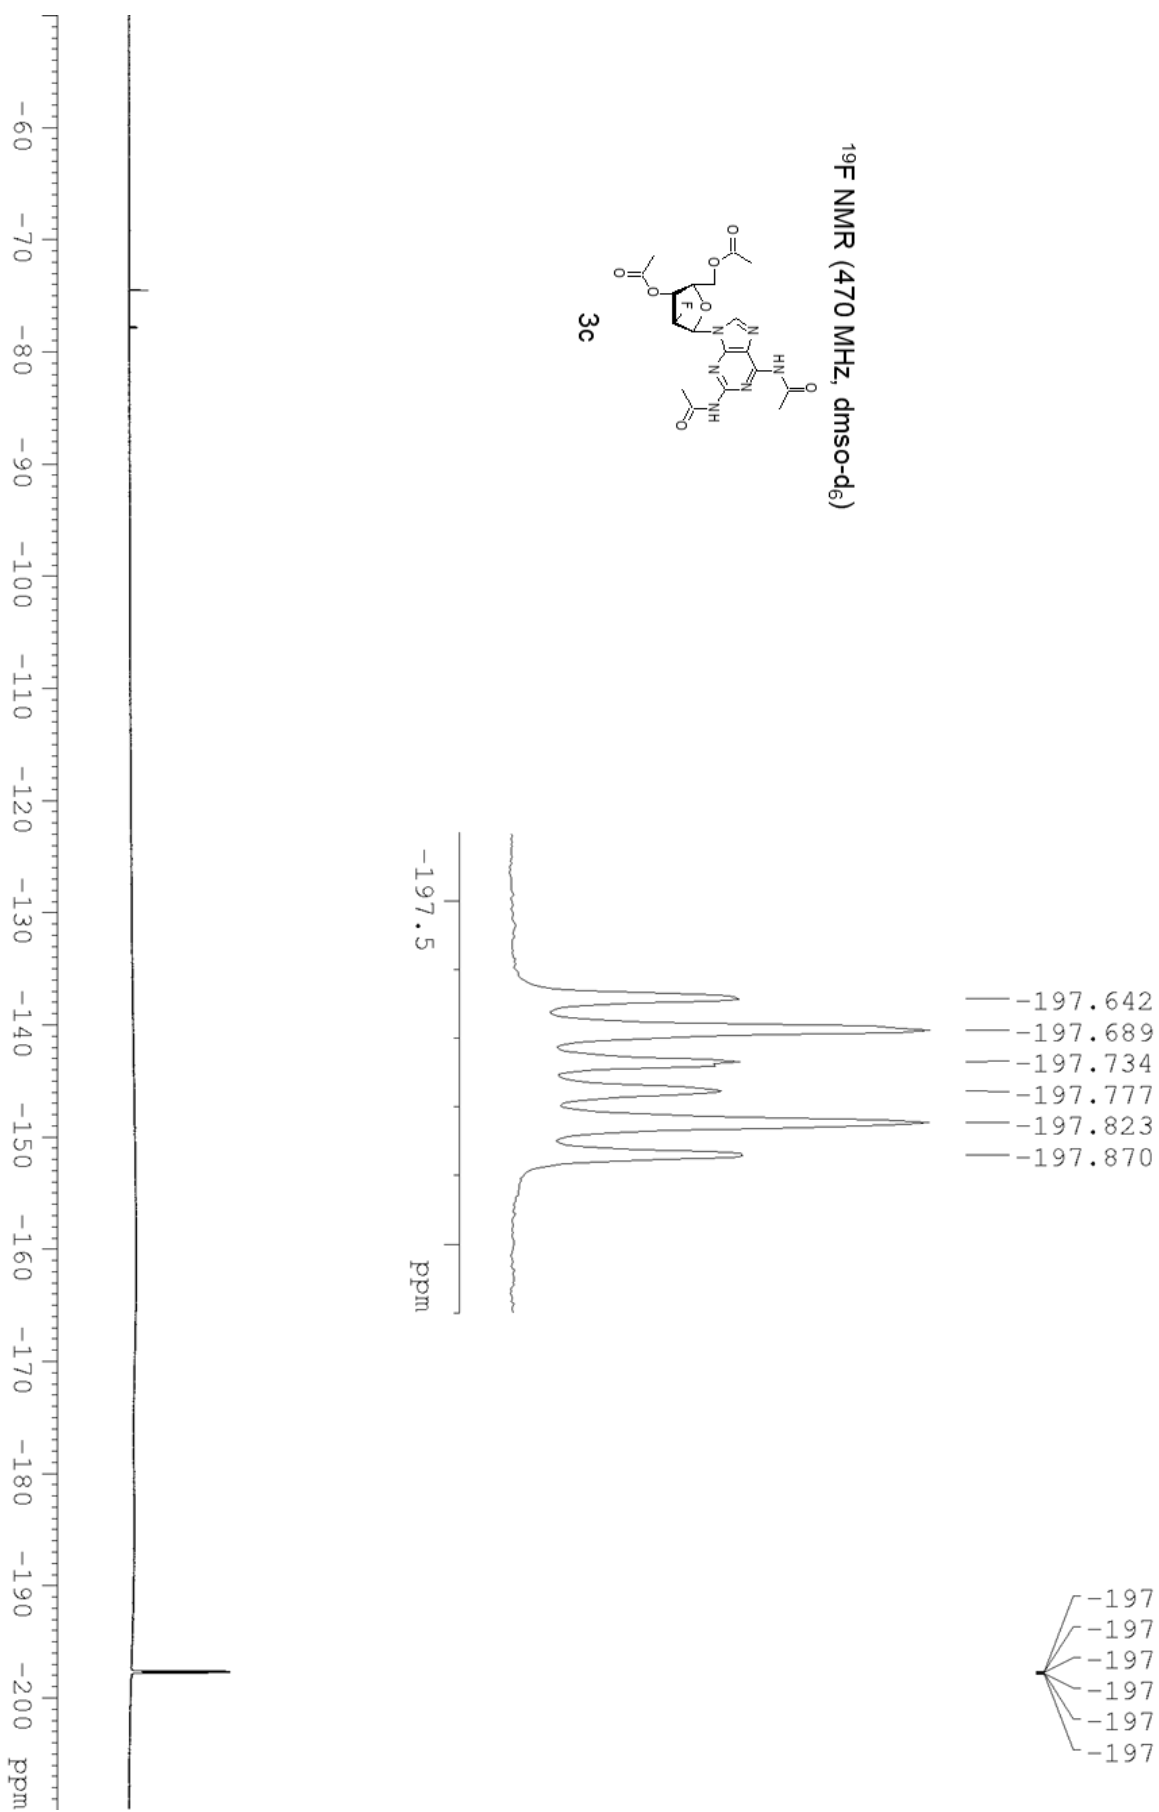

- 197.642
- 197.689
- 197.734
- 197.777
- 197.823
- 197.870

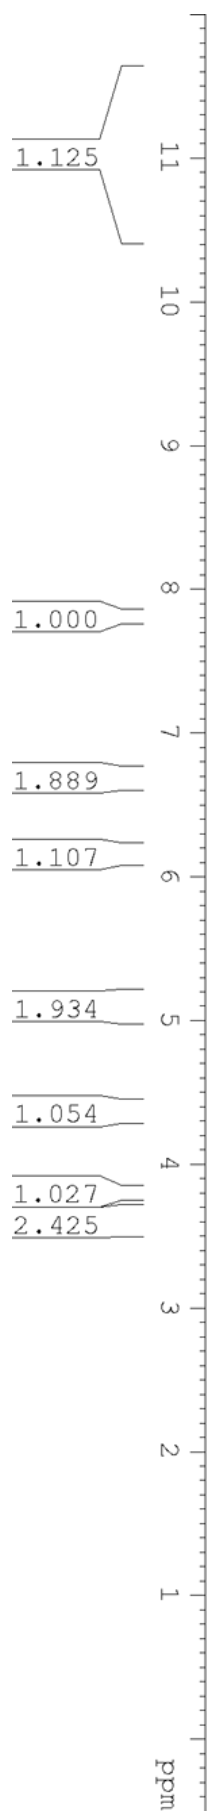

4a

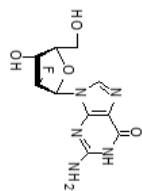

<sup>1</sup>H NMR (500 MHz, dmsco-d<sub>6</sub>)

— 10.937

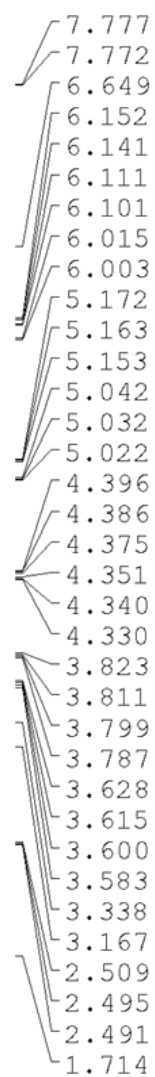

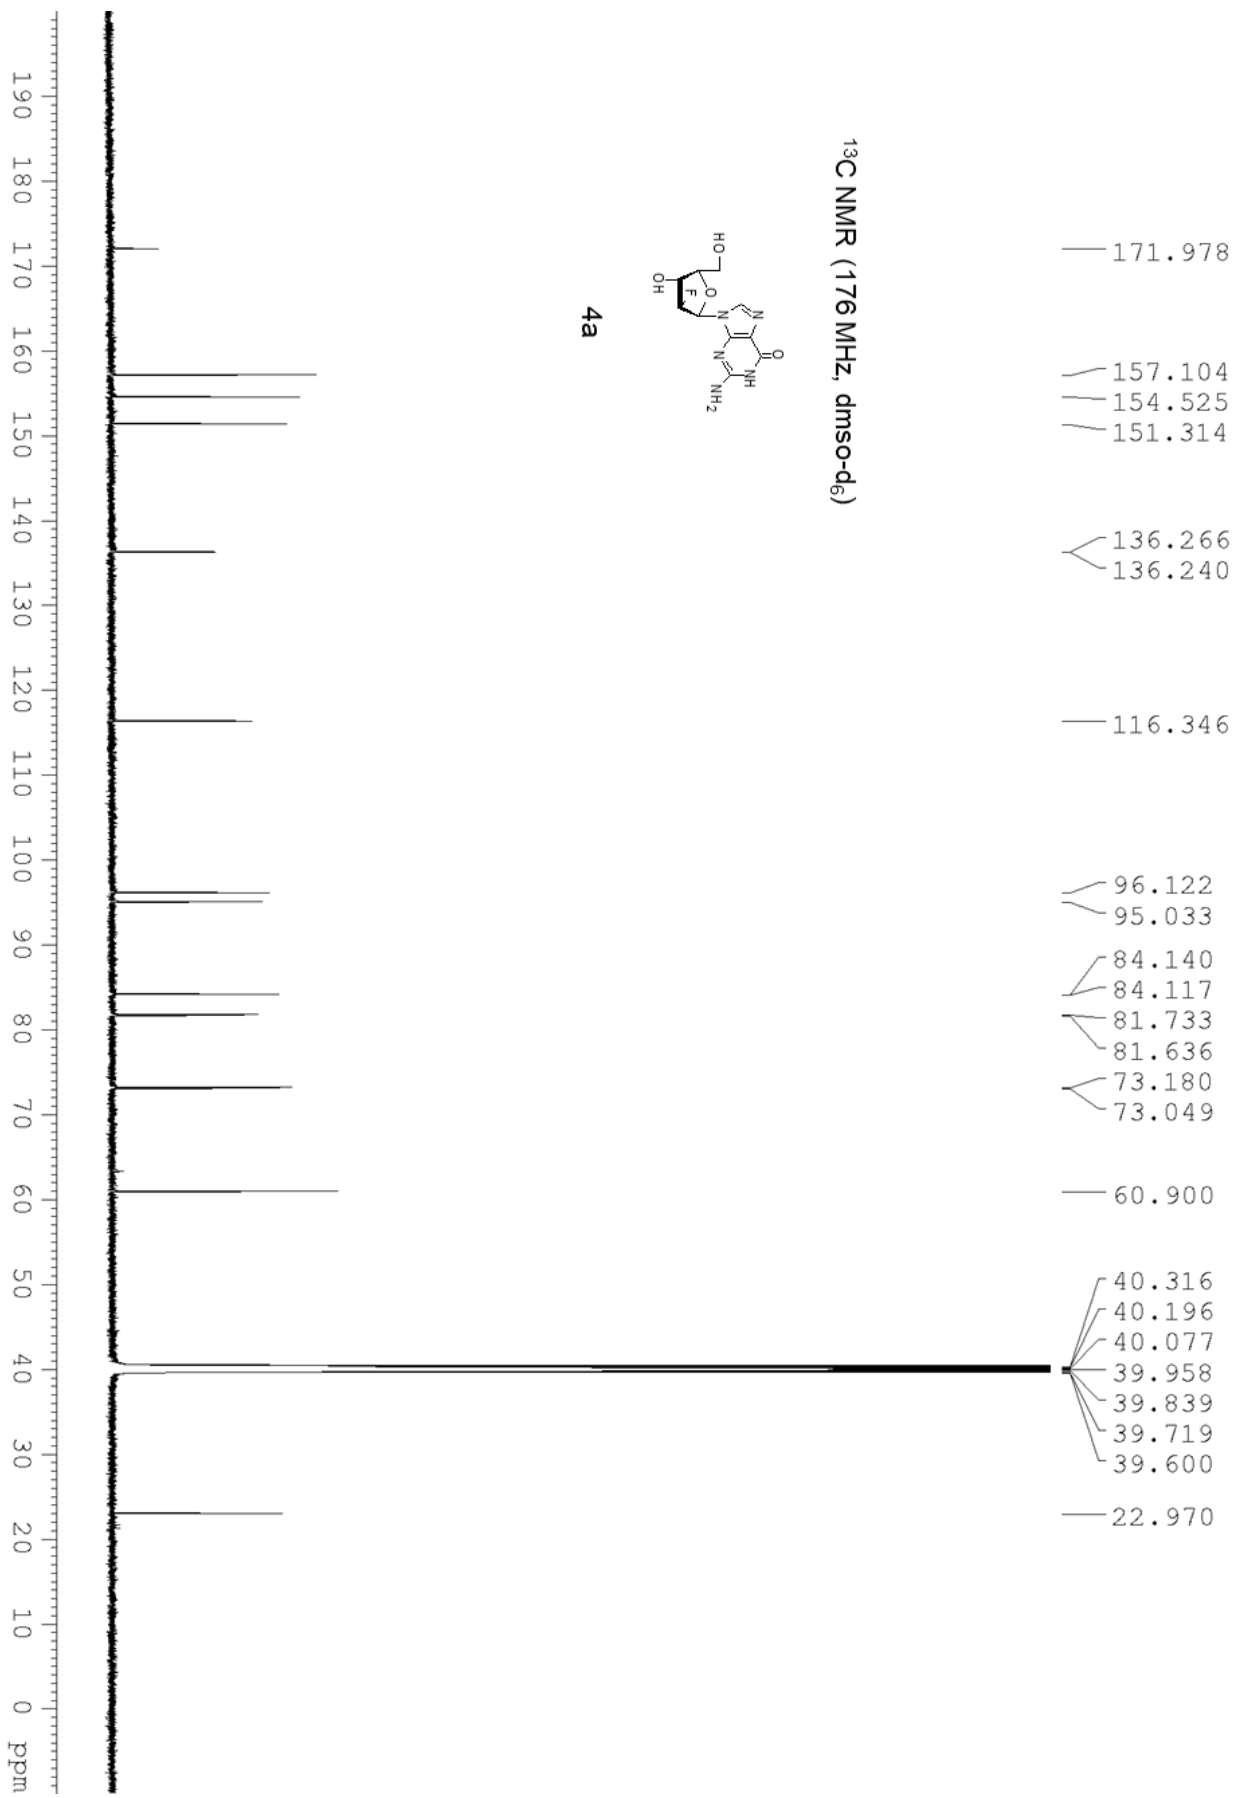



<sup>19</sup>F NMR (376 MHz, dms<sub>o</sub>-d<sub>6</sub>)

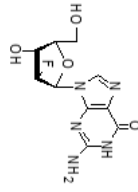

4a

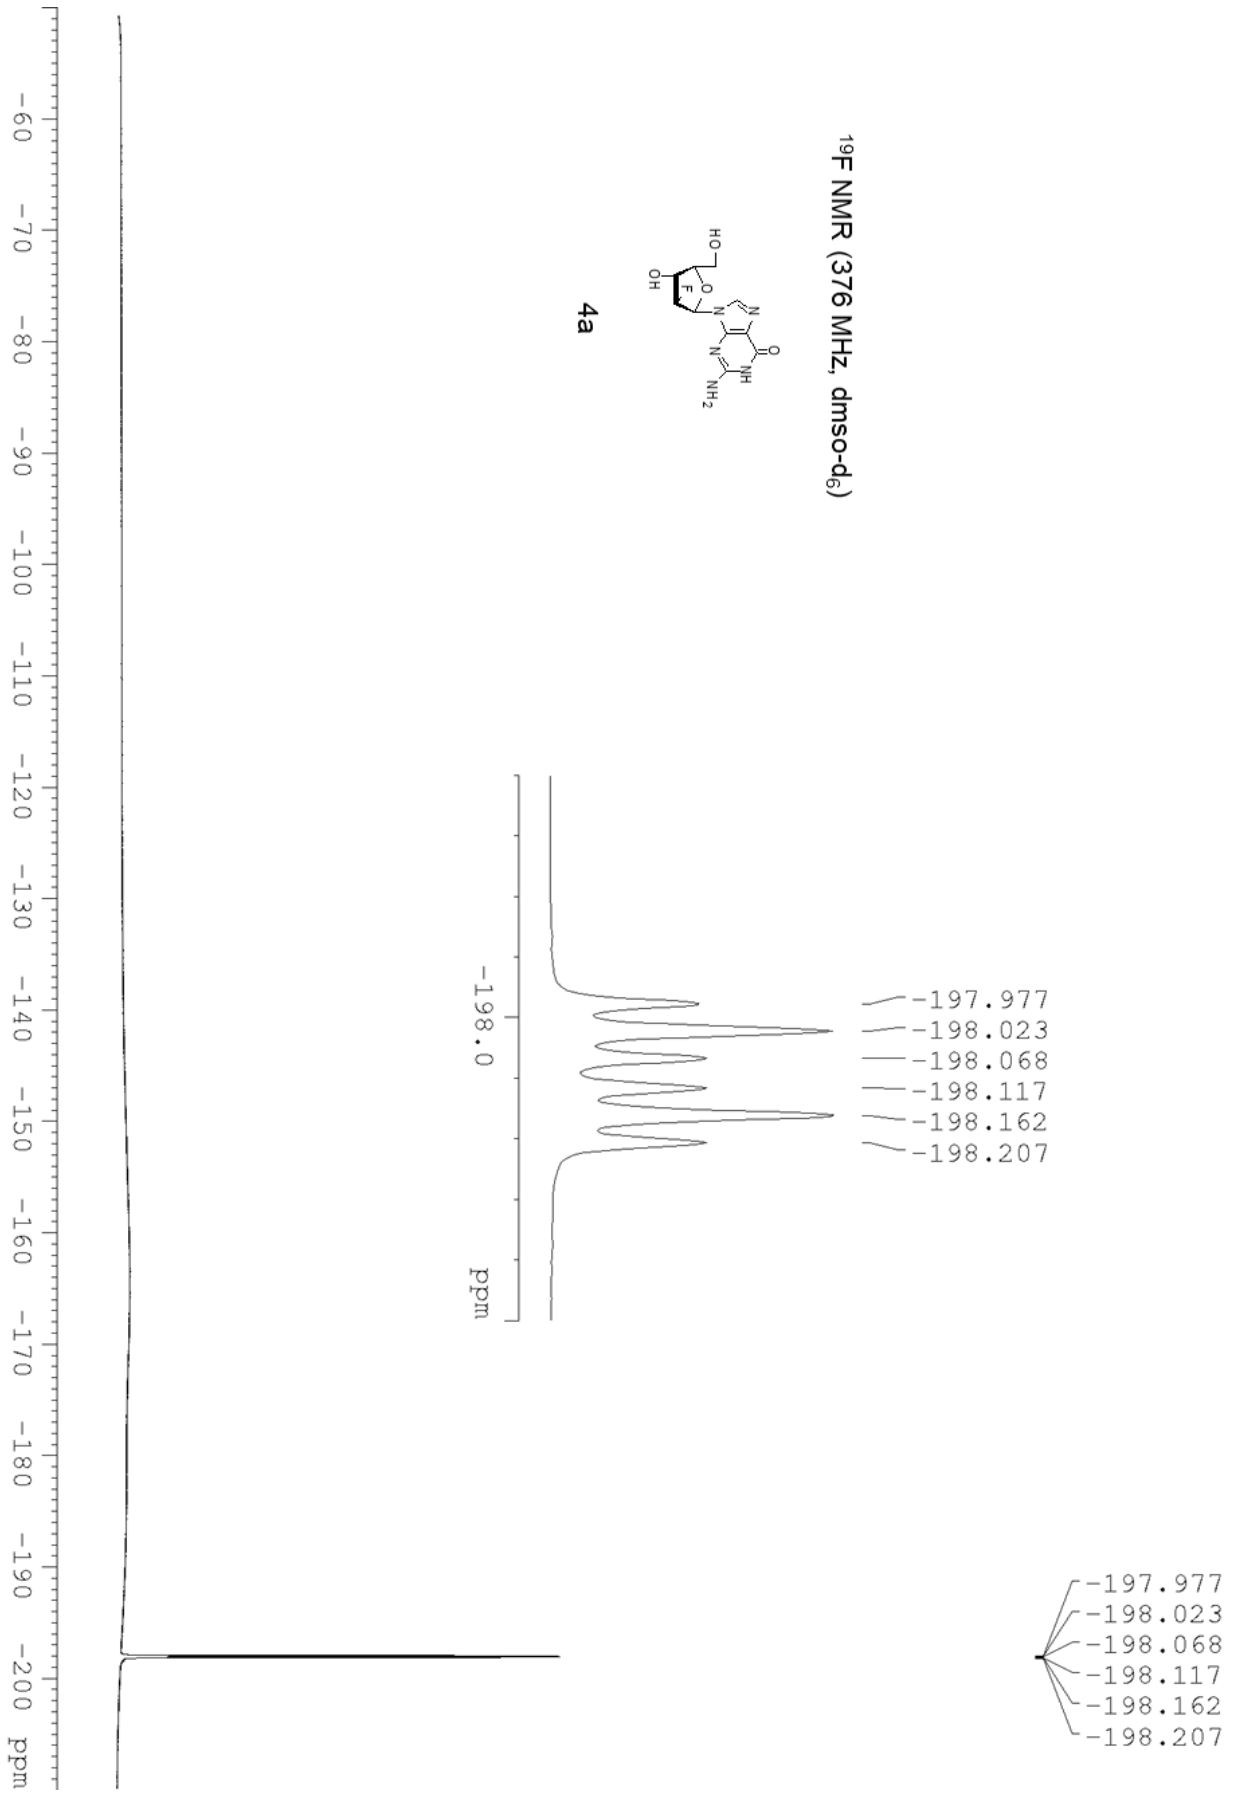

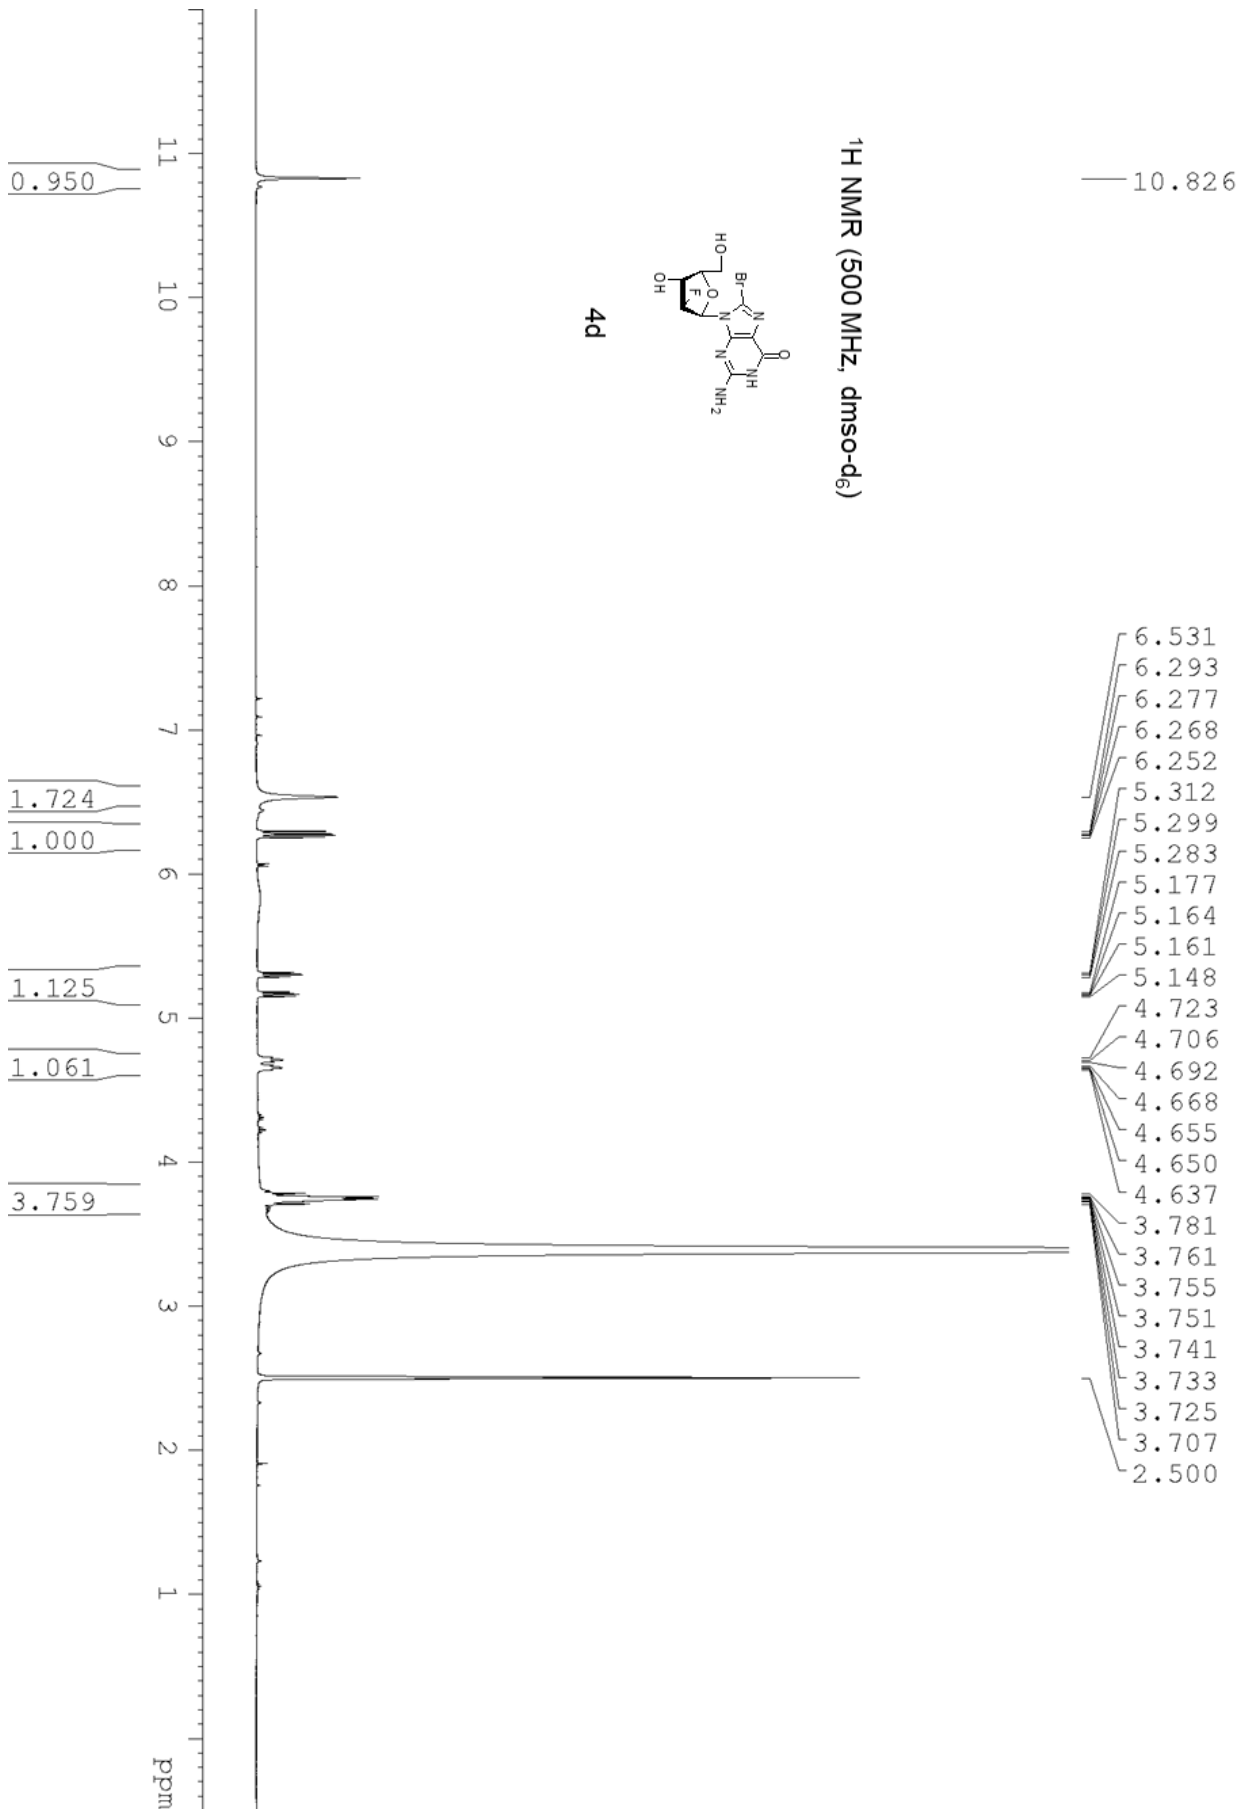

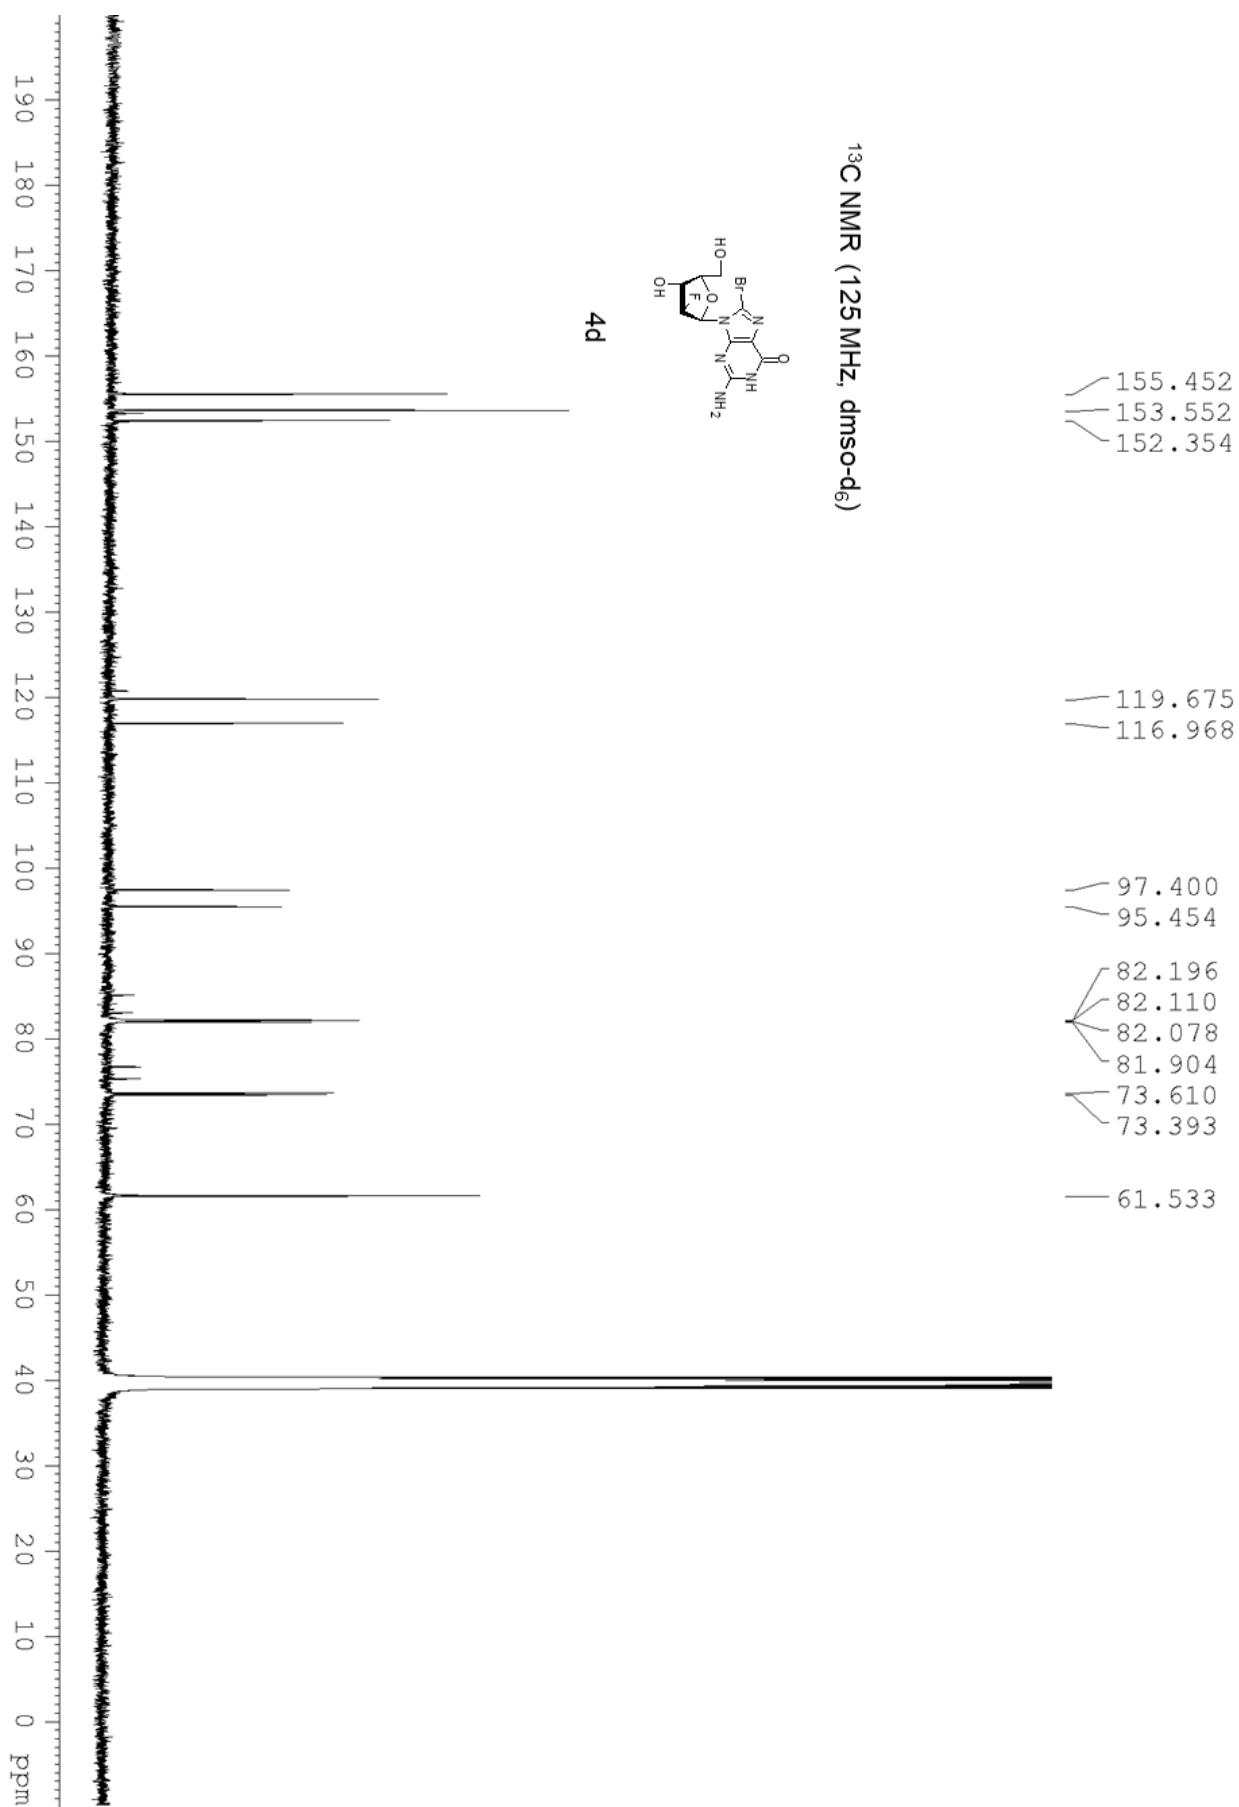

<sup>19</sup>F NMR (376 MHz, dms<sub>o</sub>-d<sub>6</sub>)

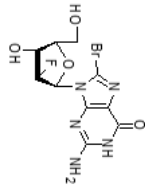

4d

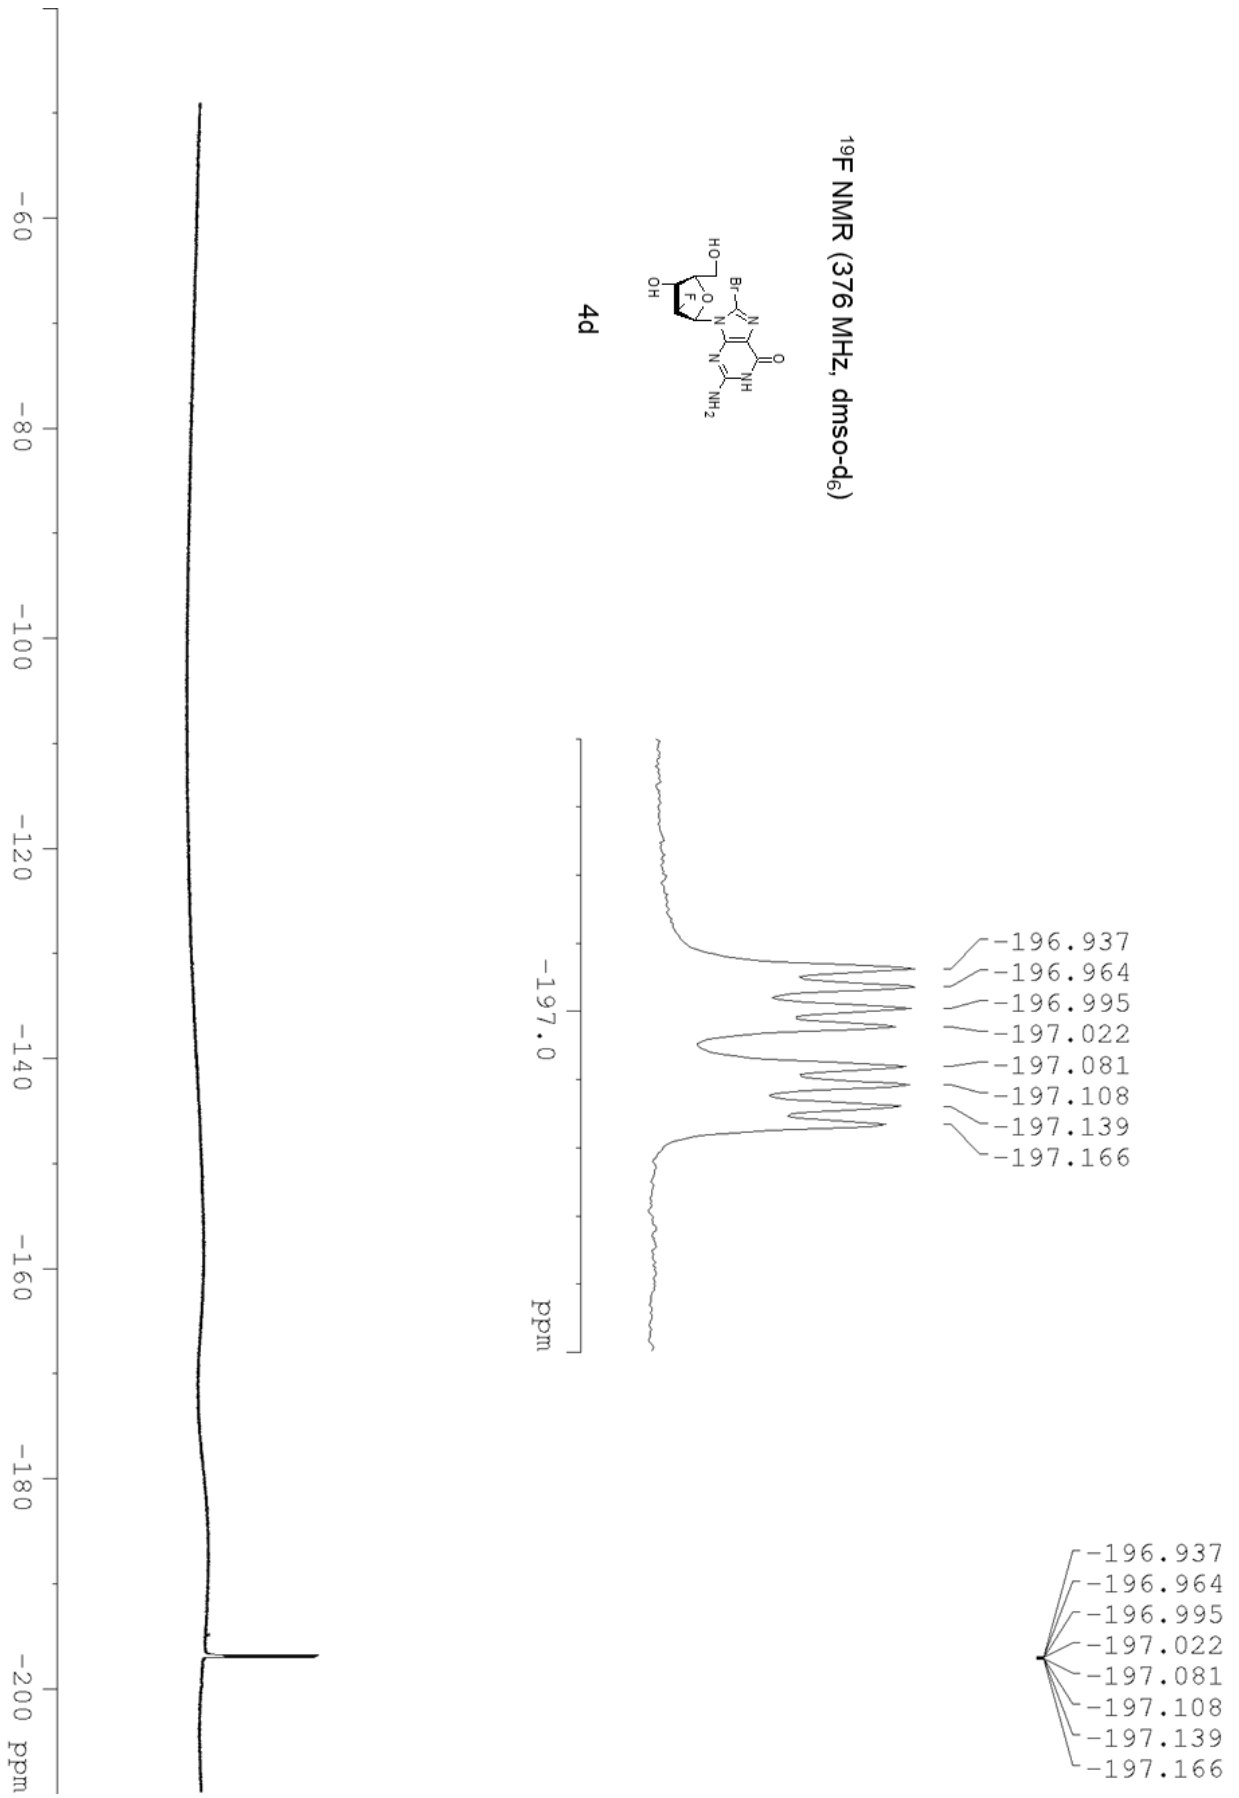

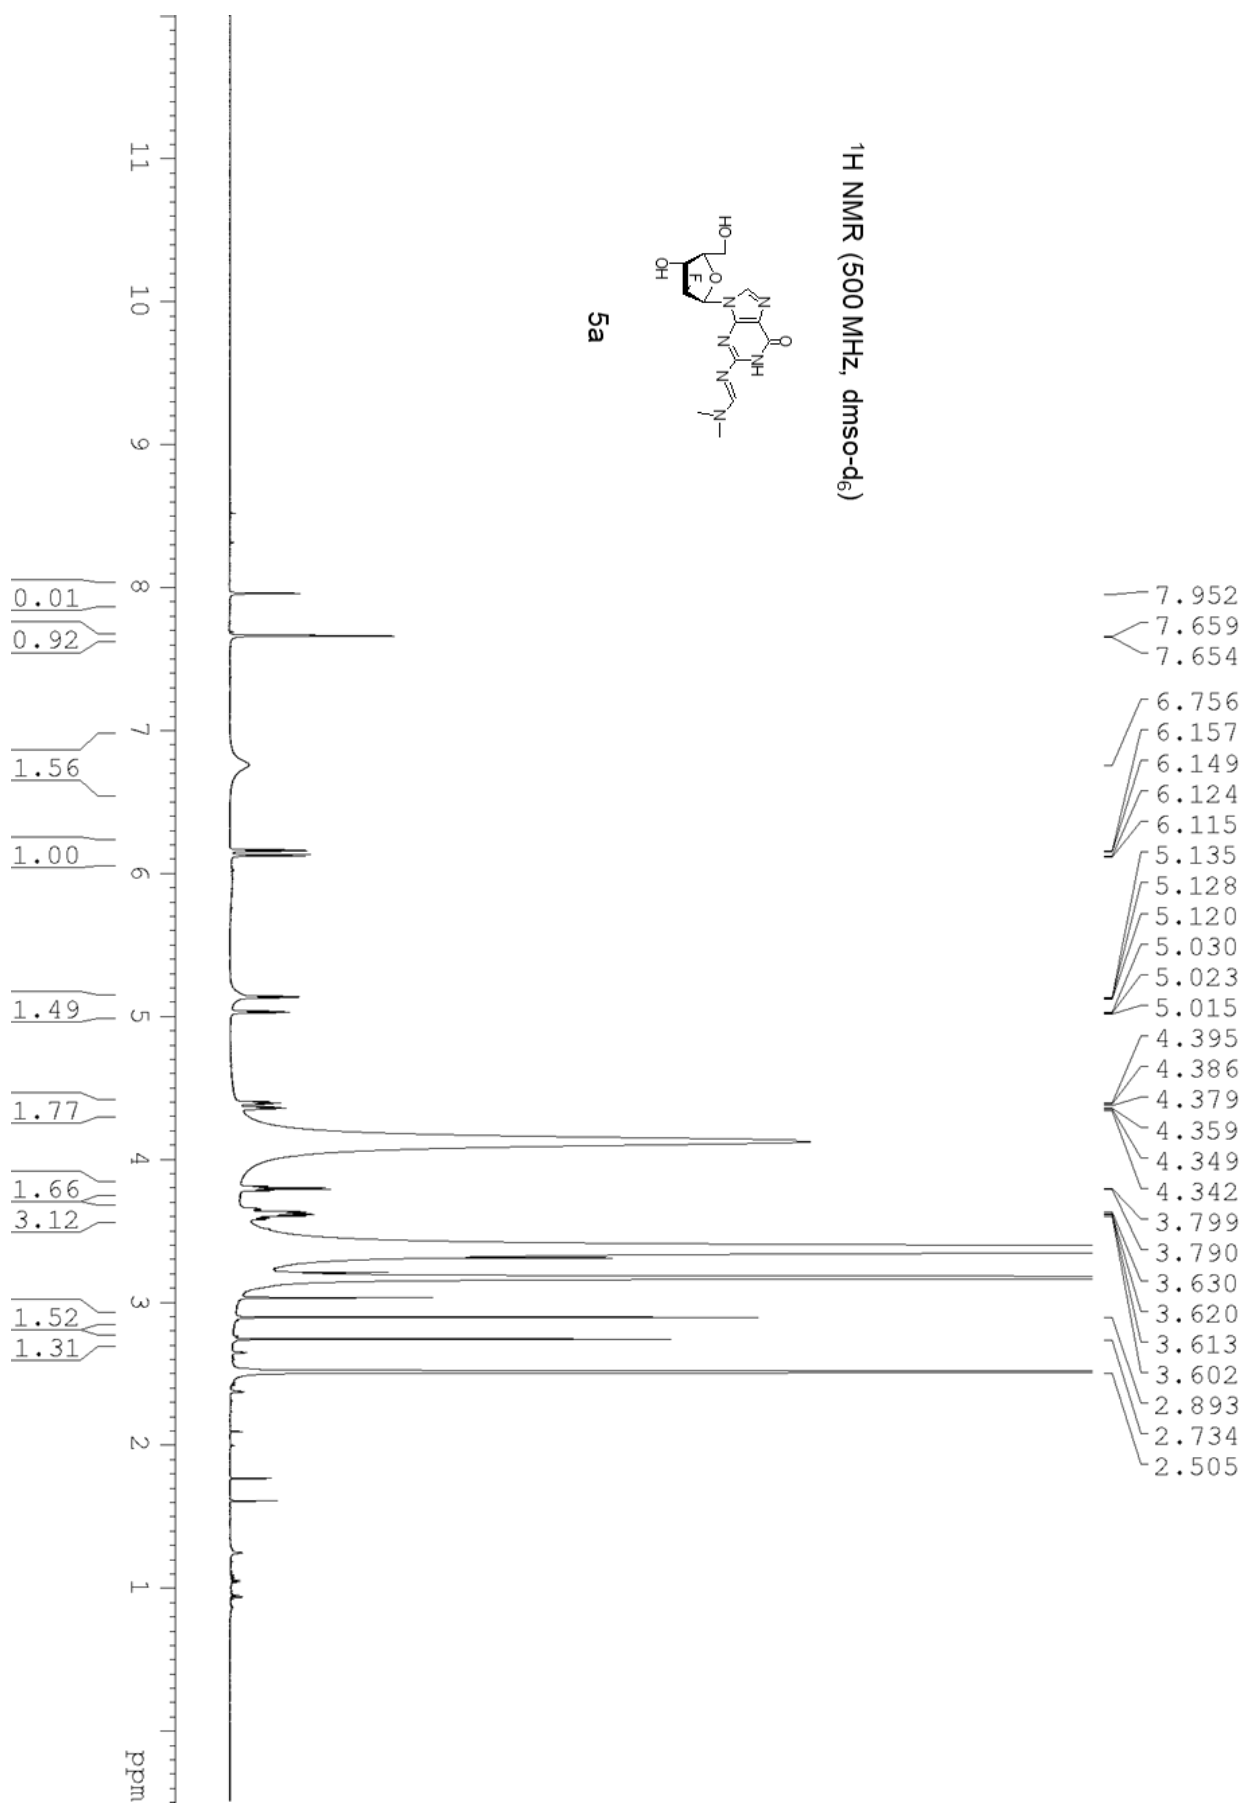

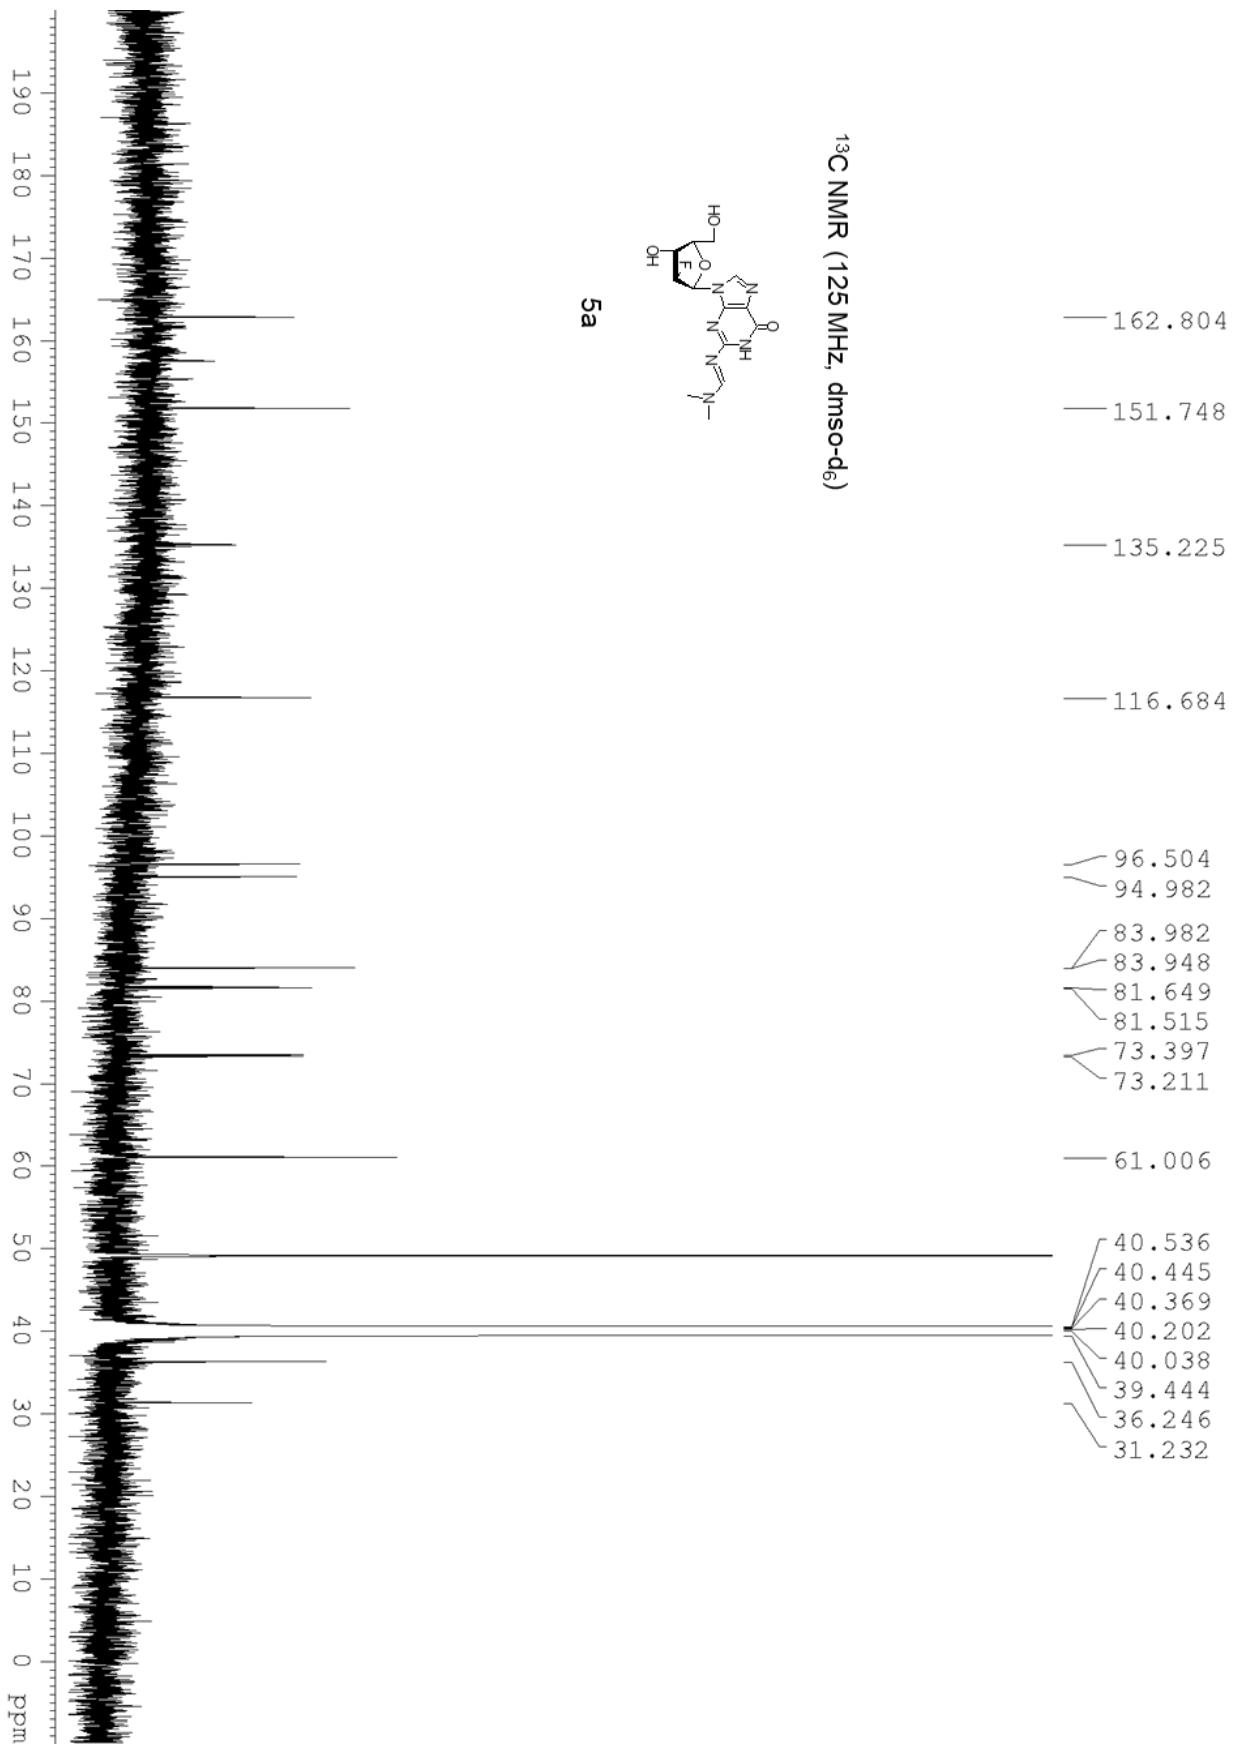

<sup>19</sup>F NMR (376 MHz, dmso-d<sub>6</sub>)

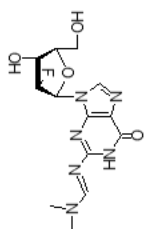

5a

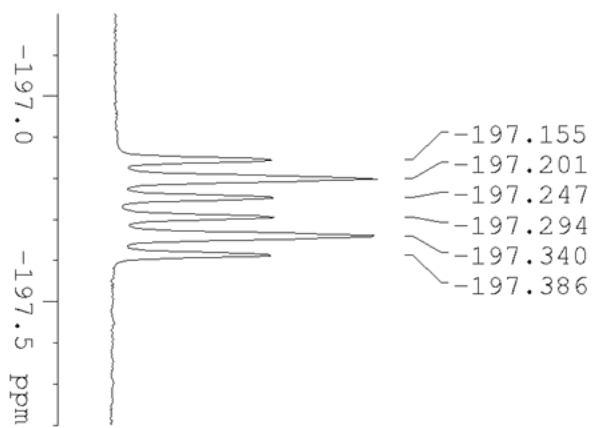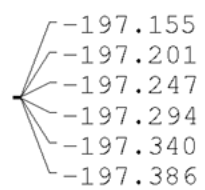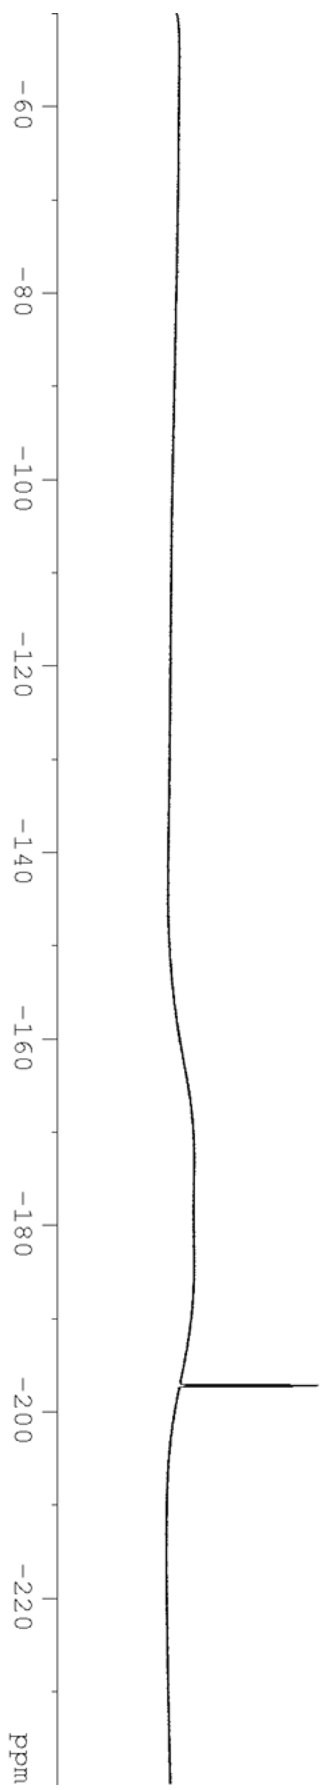

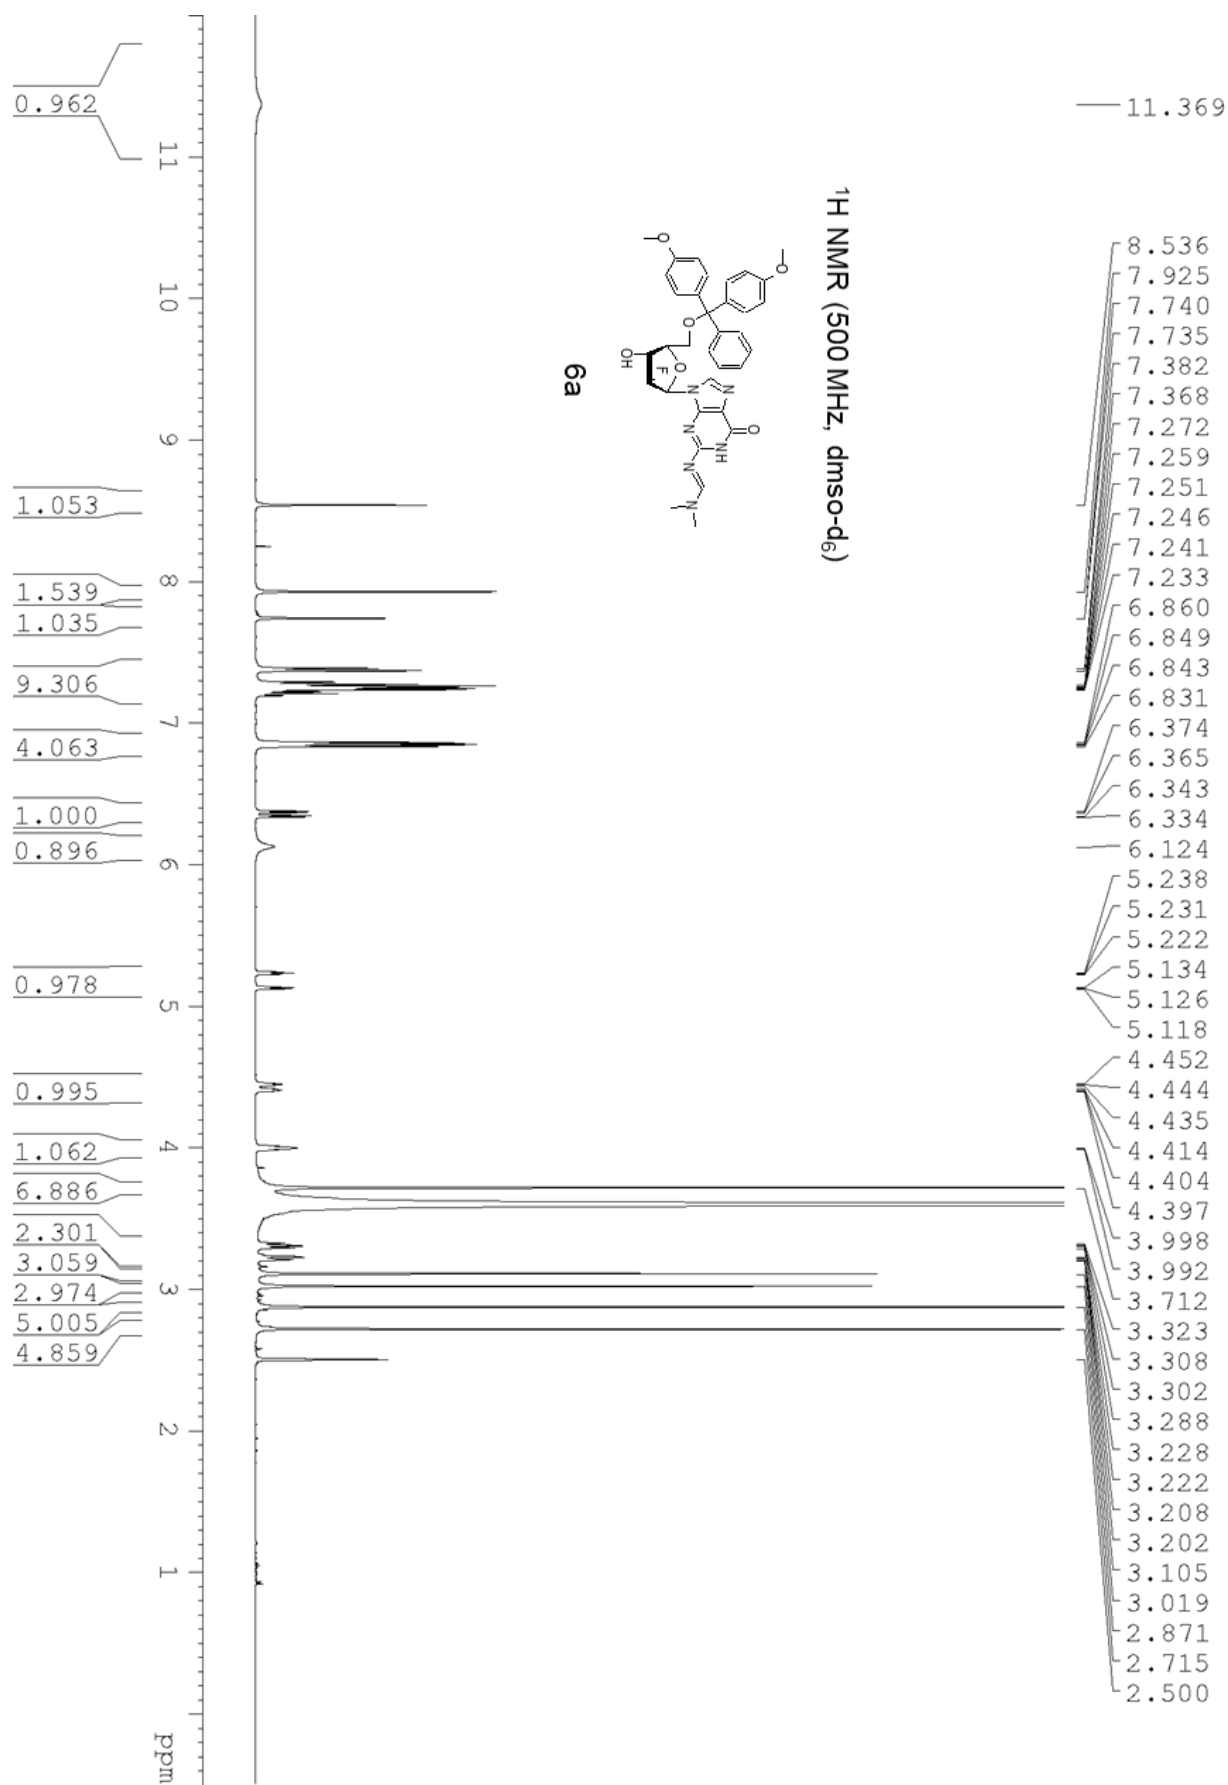



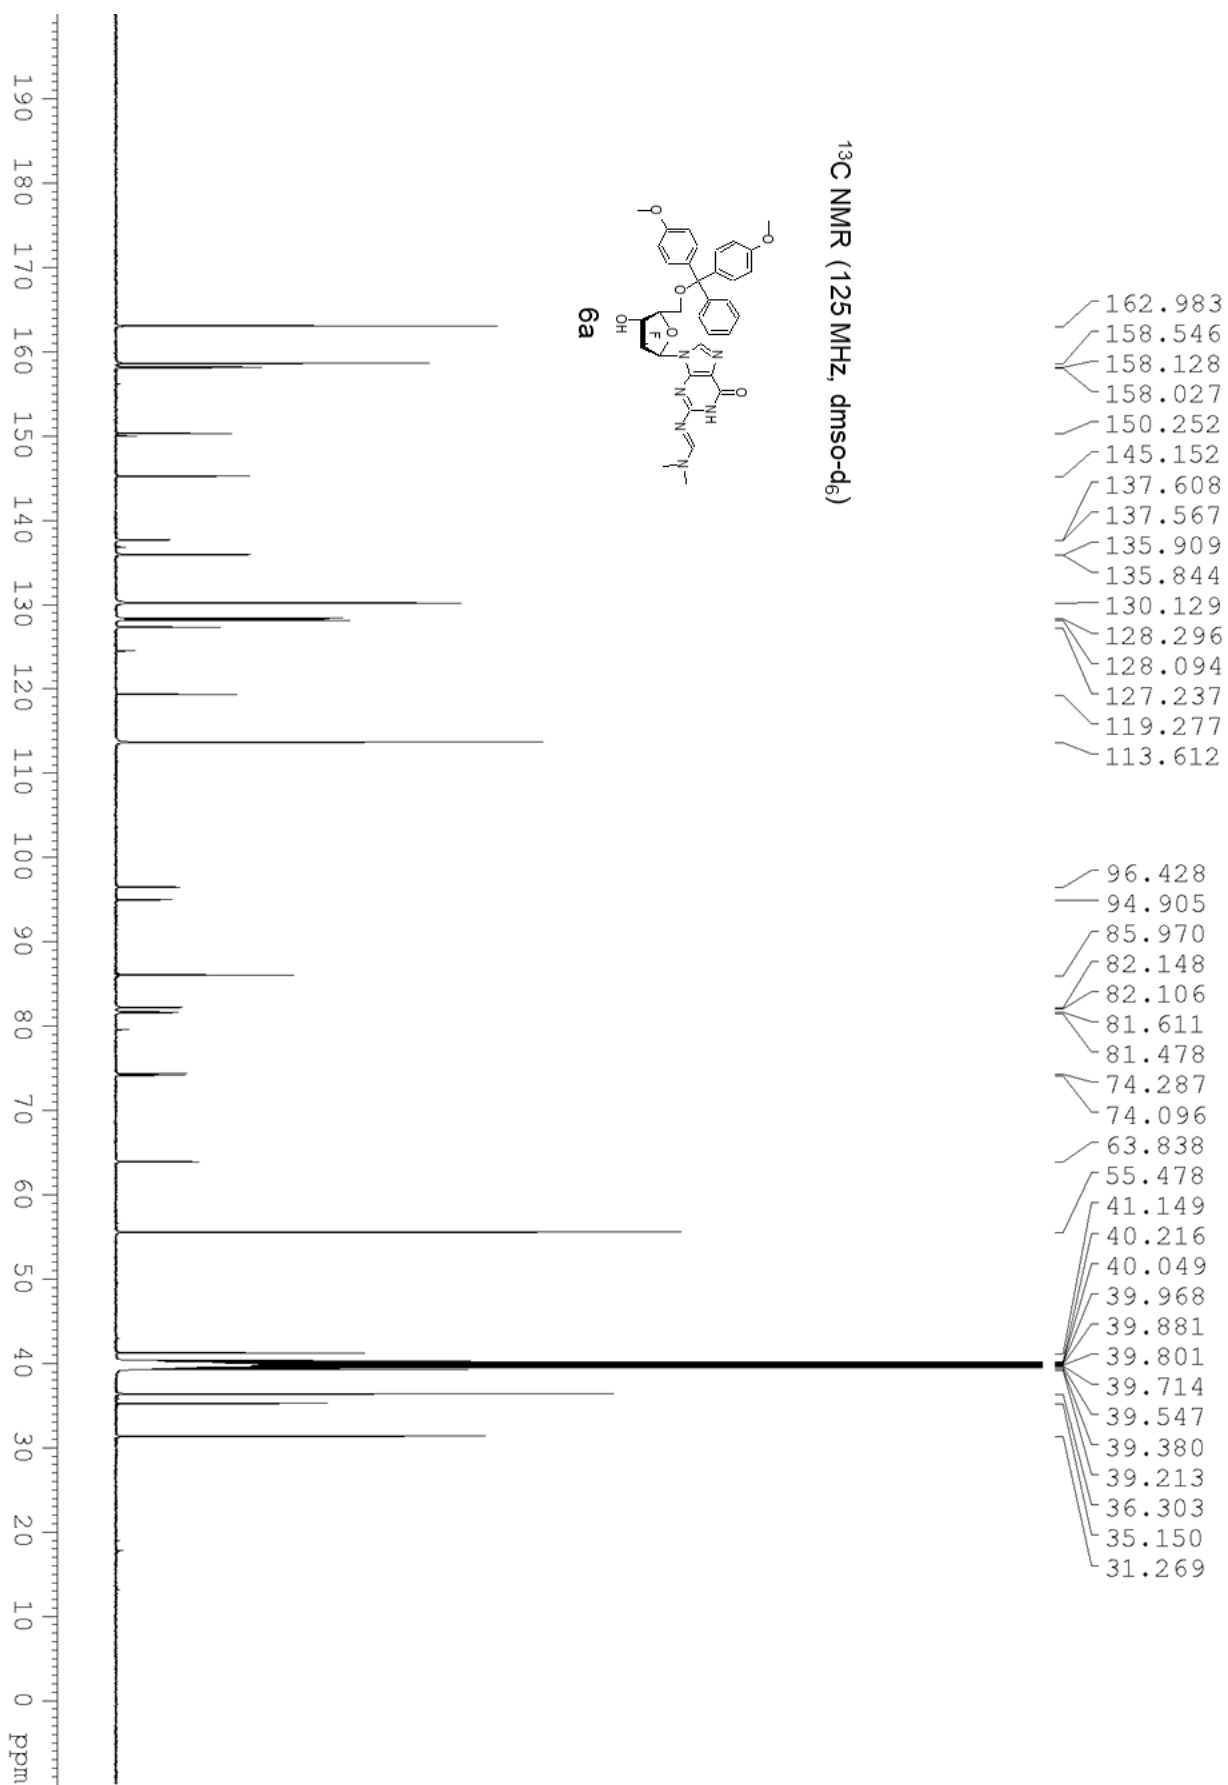

<sup>19</sup>F NMR (470 MHz, dmsO-d<sub>6</sub>)

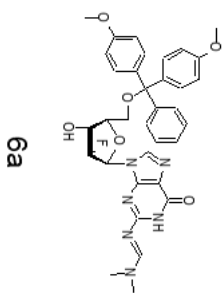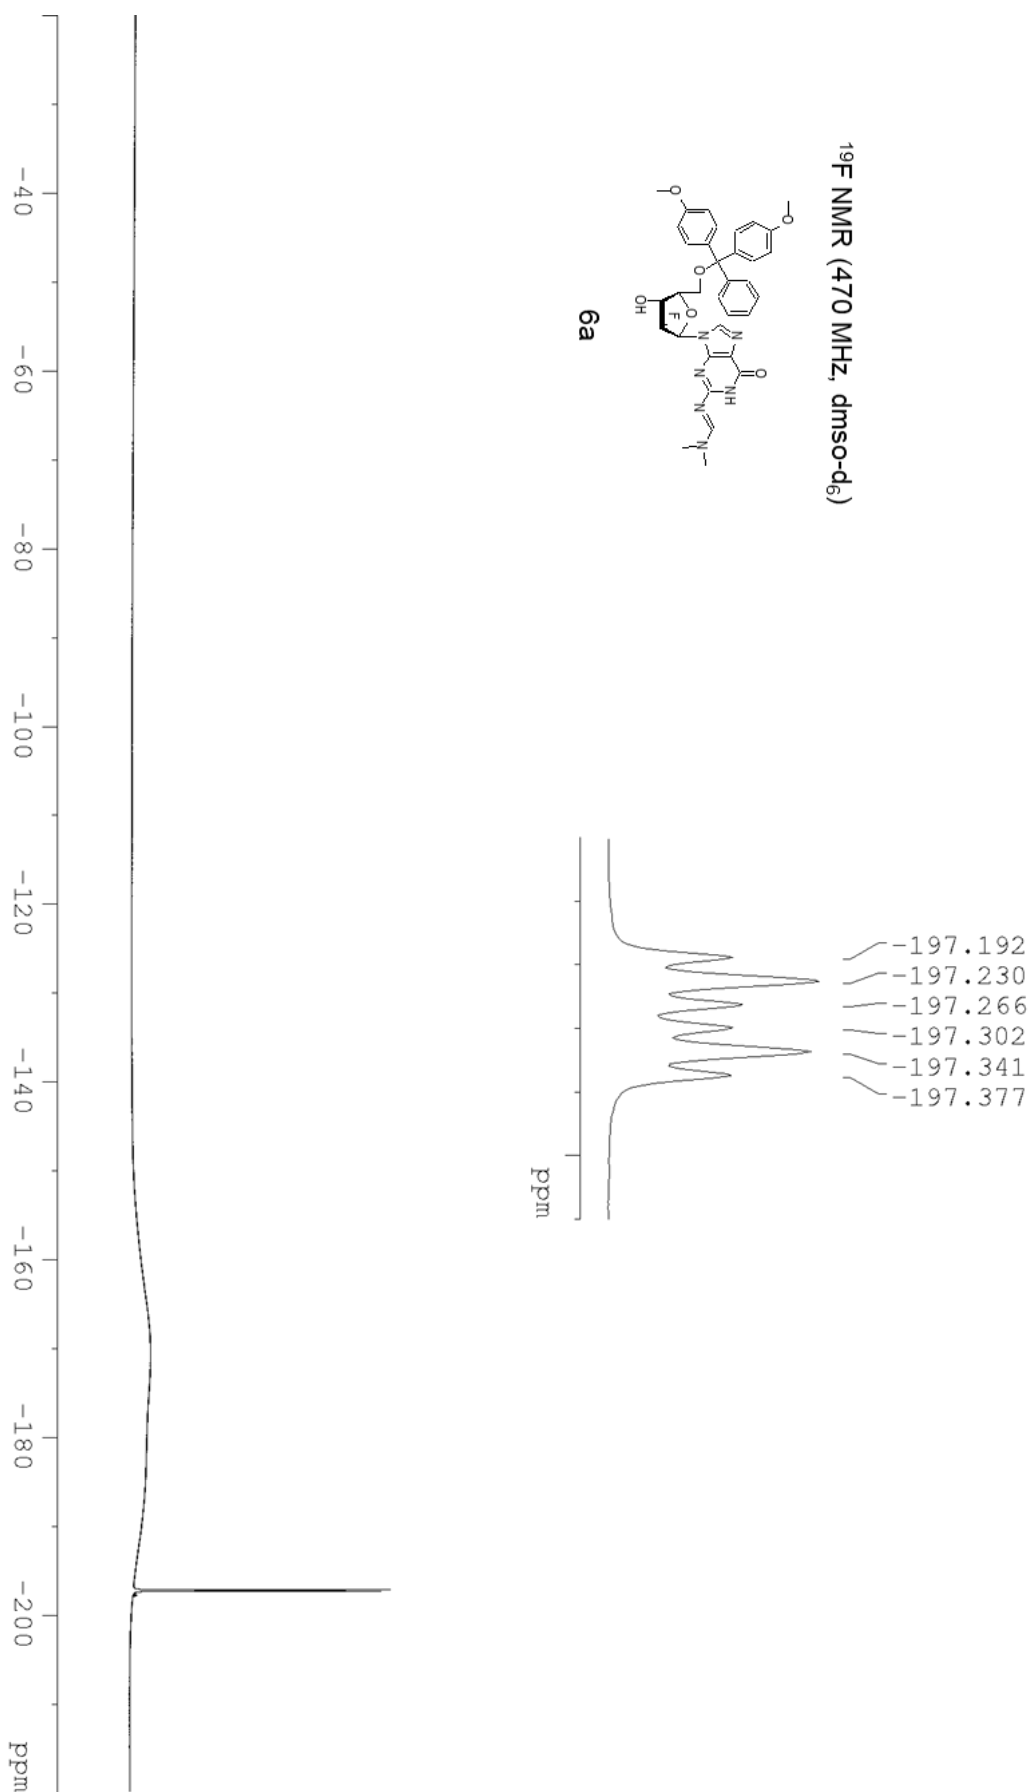

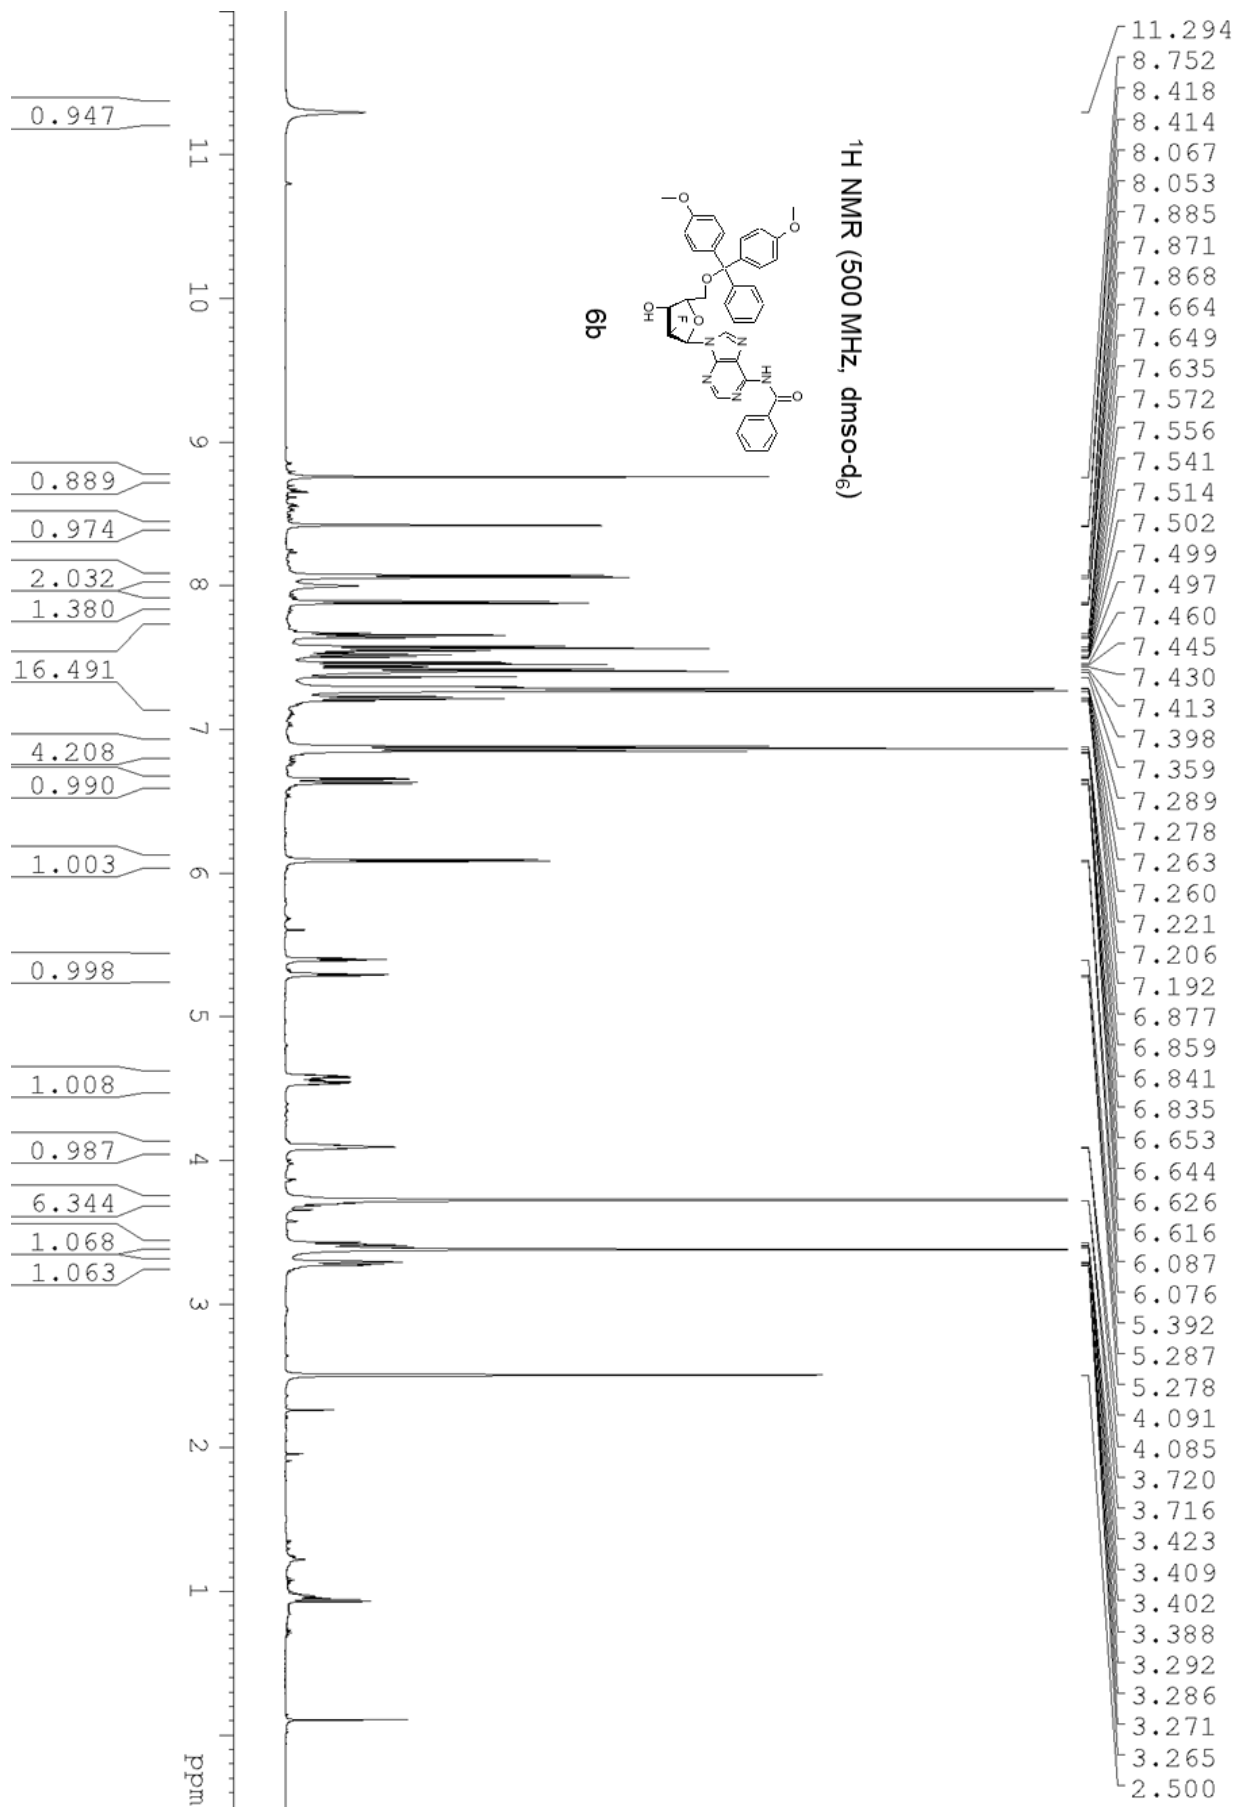

<sup>13</sup>C NMR (125 MHz, dmso-d<sub>6</sub>)

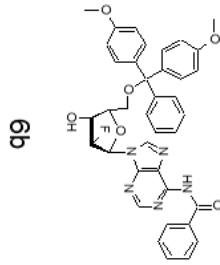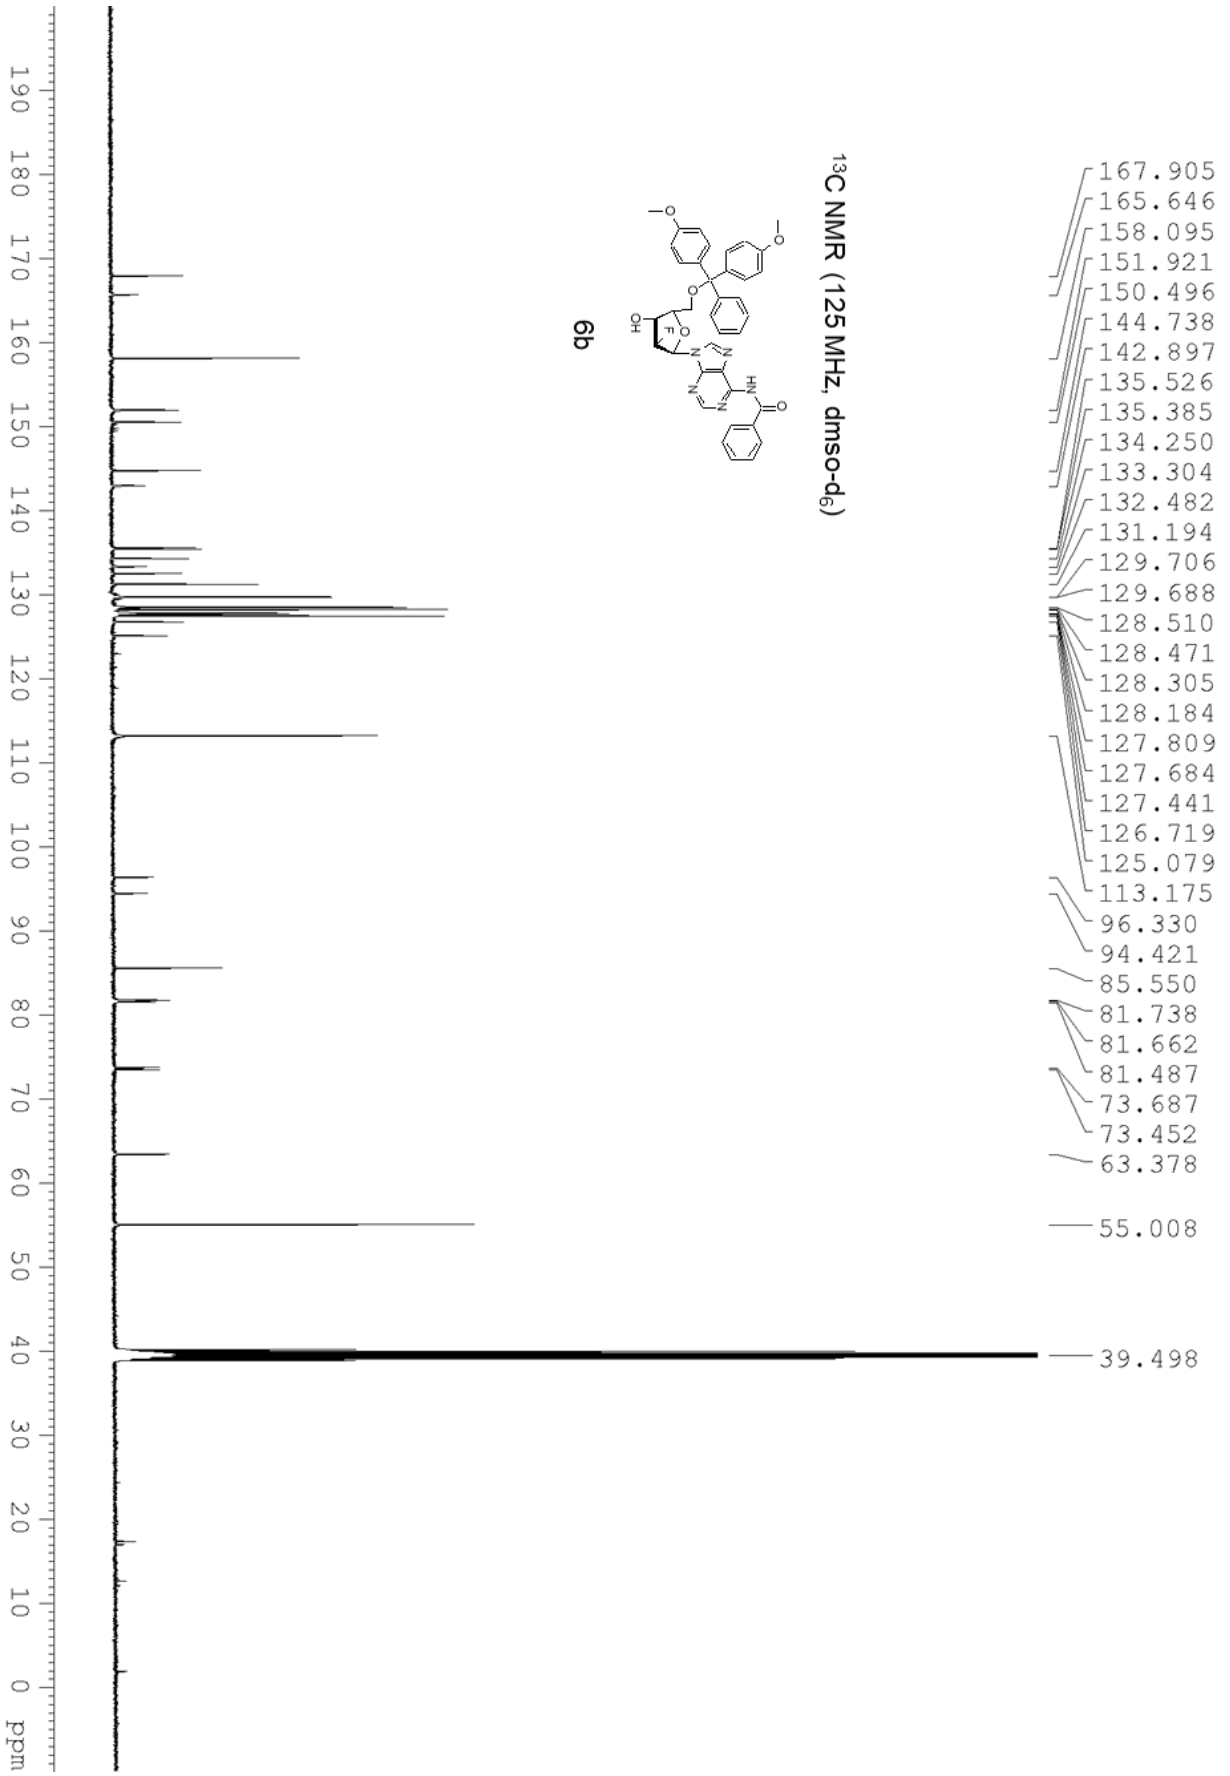

<sup>19</sup>F NMR (470 MHz, dmsd-d<sub>6</sub>)

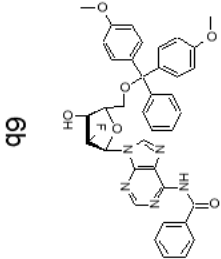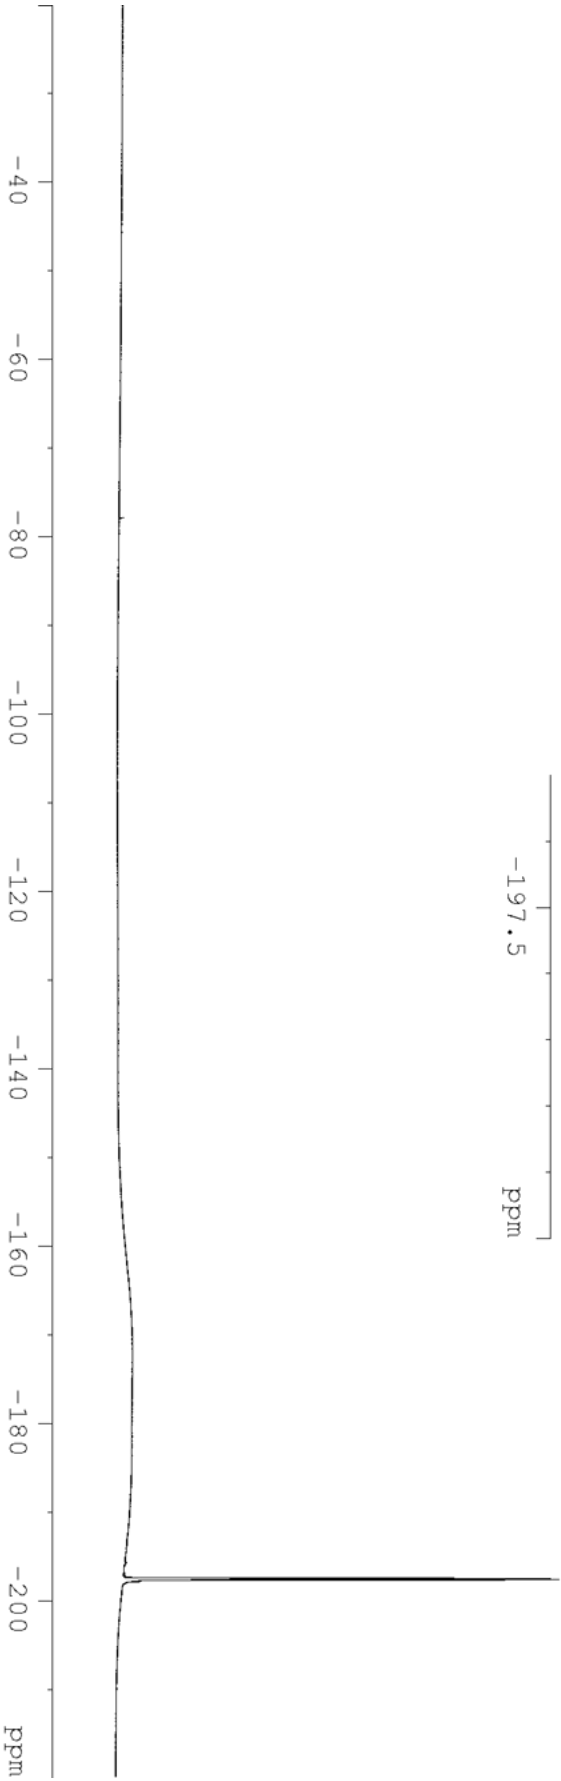

- 197.565
- 197.607
- 197.654
- 197.704
- 197.748
- 197.793

- 197.565
- 197.607
- 197.654
- 197.704
- 197.748
- 197.793

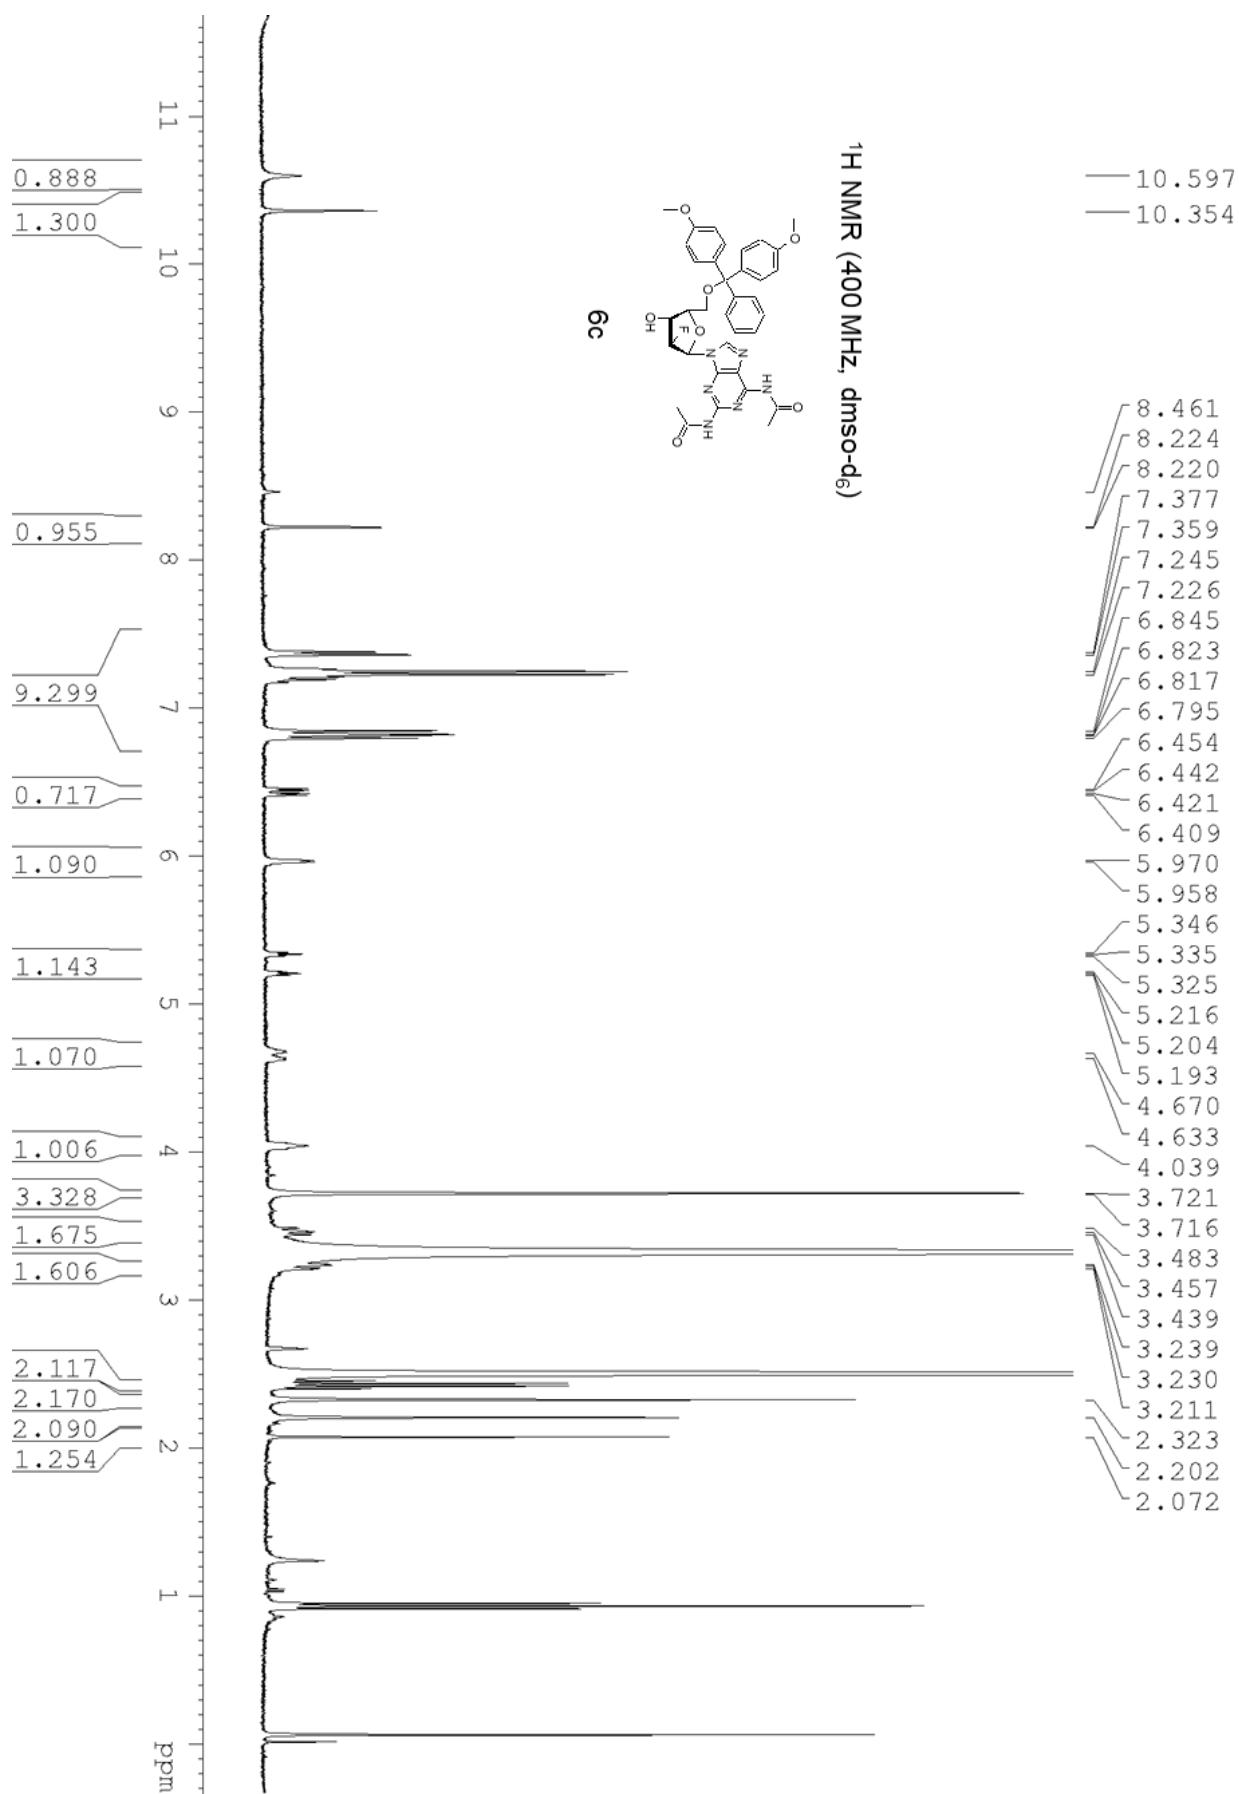

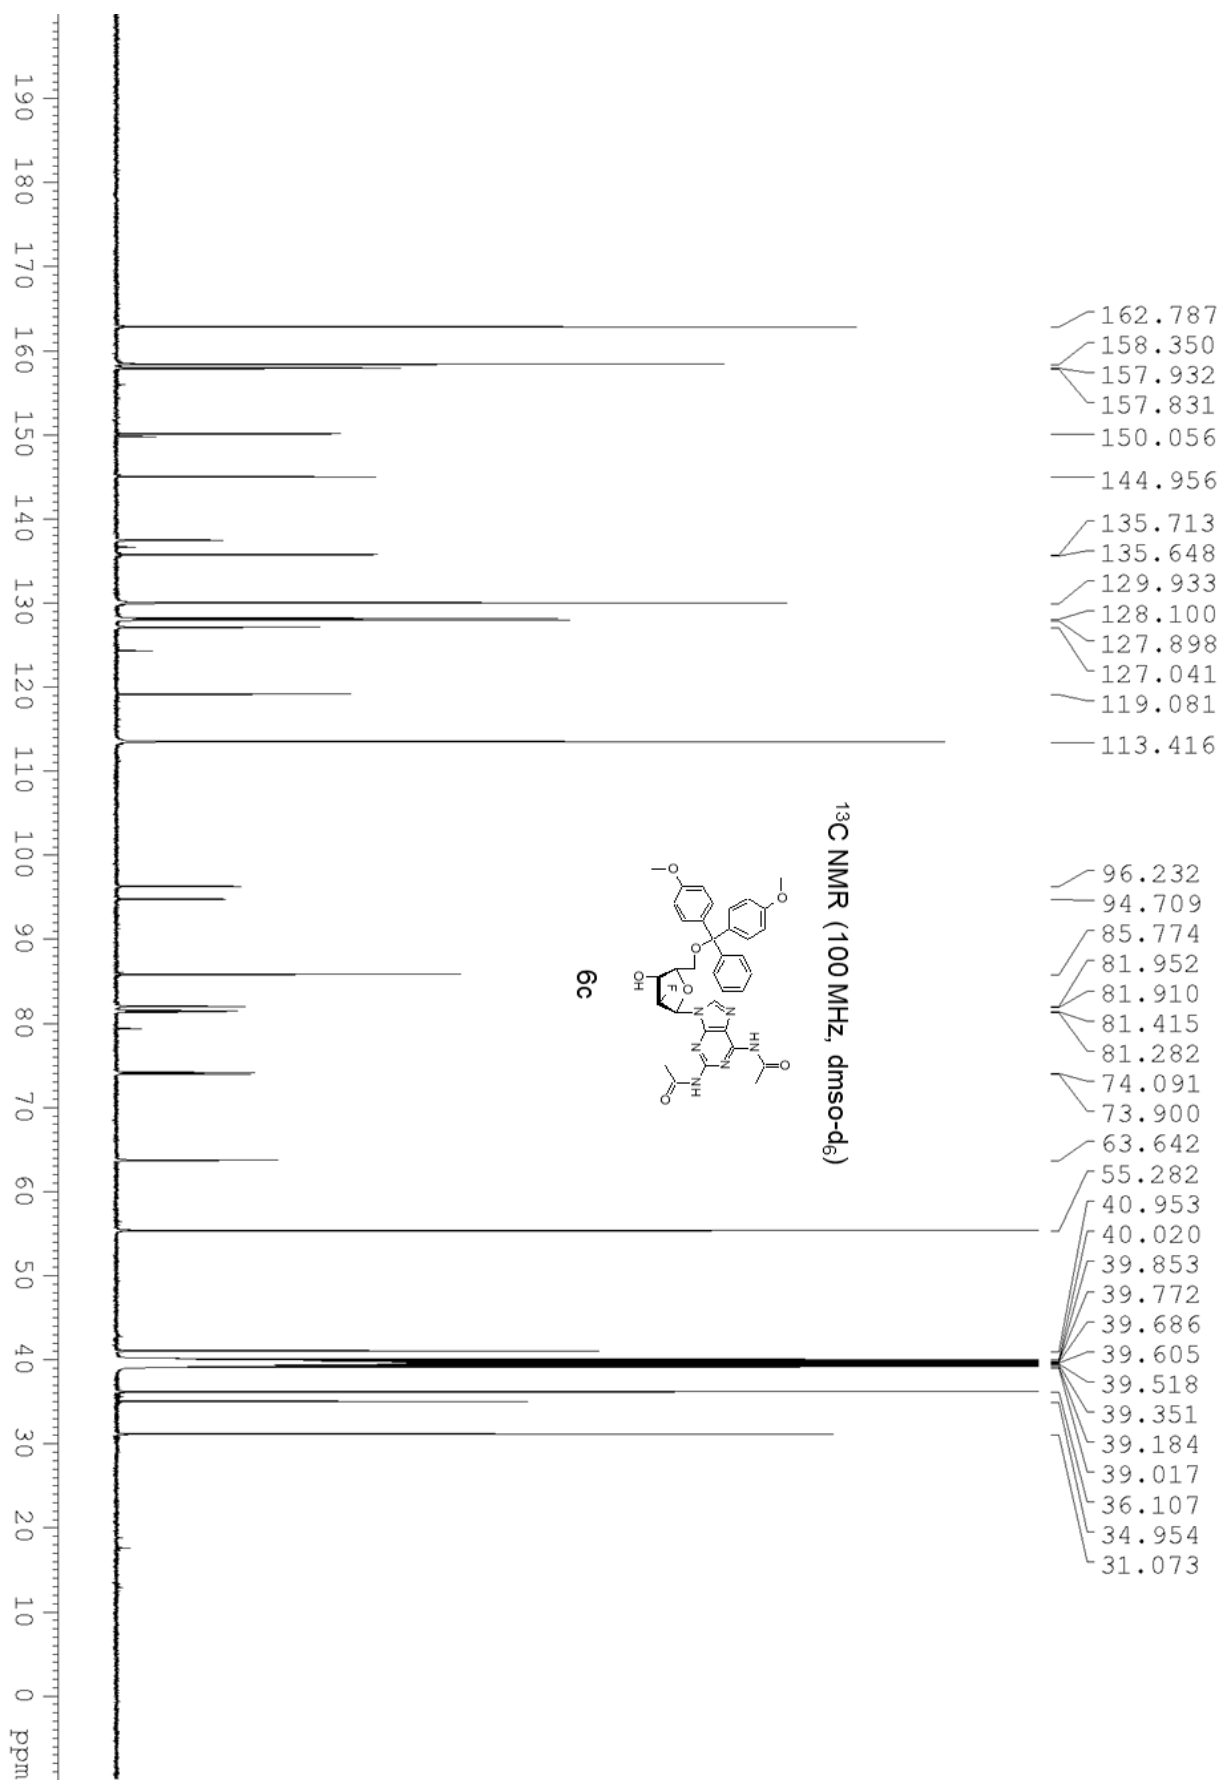

<sup>19</sup>F NMR (376 MHz, dimso-d<sub>6</sub>)

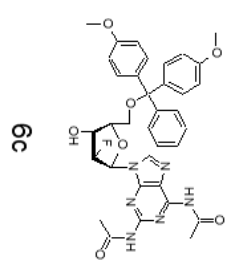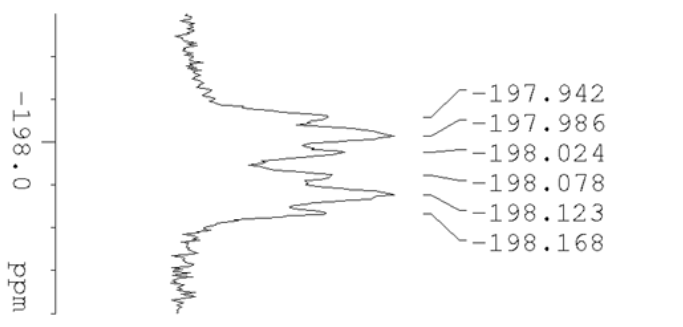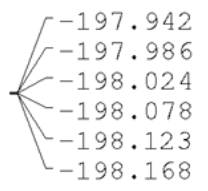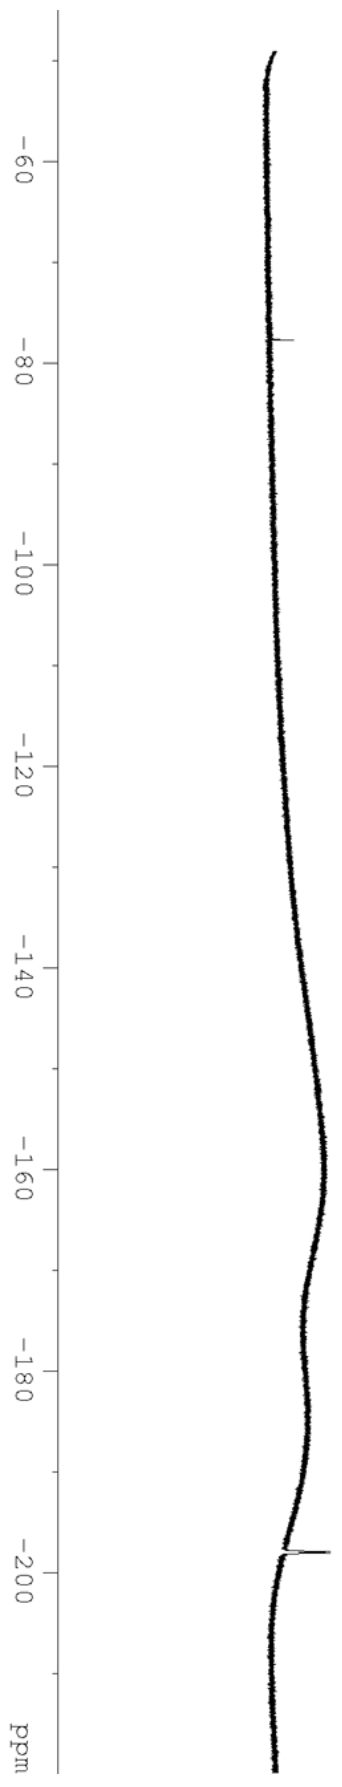



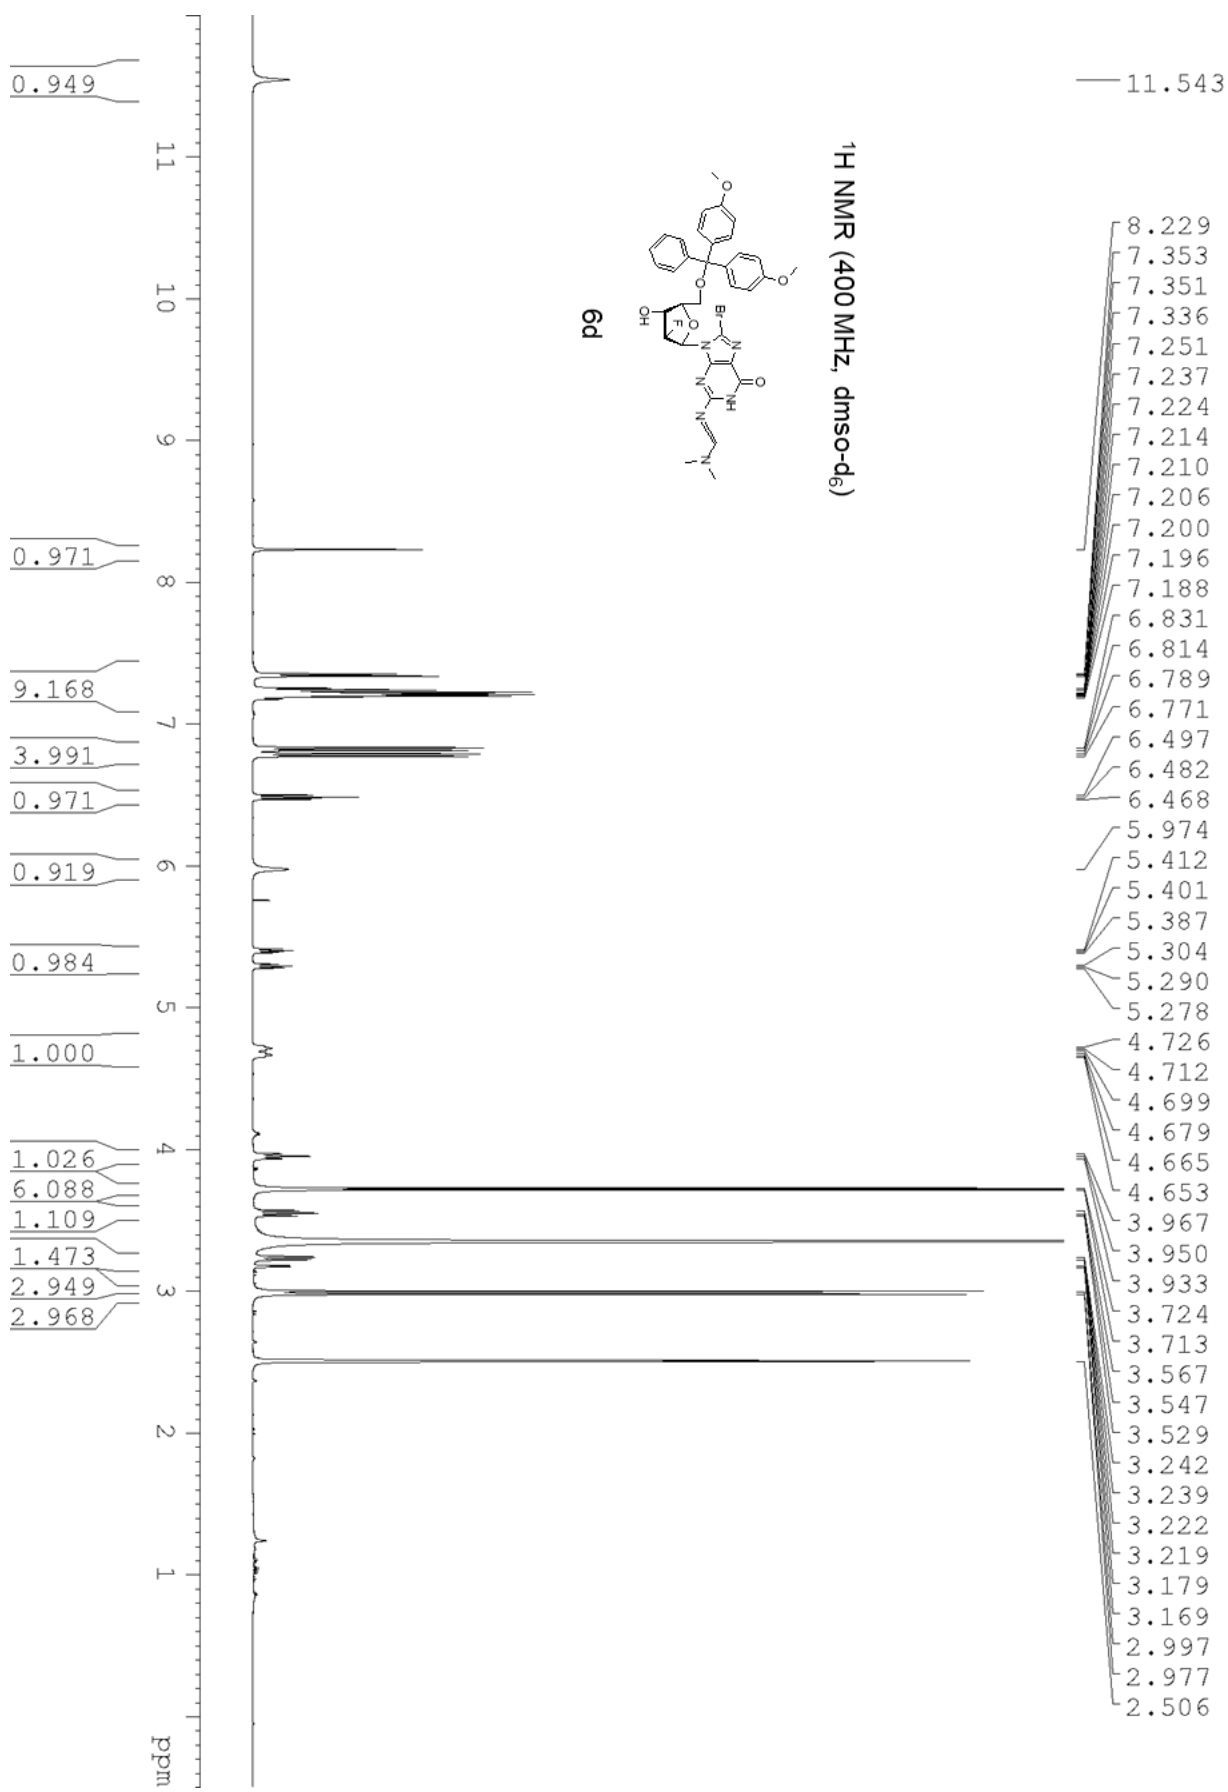

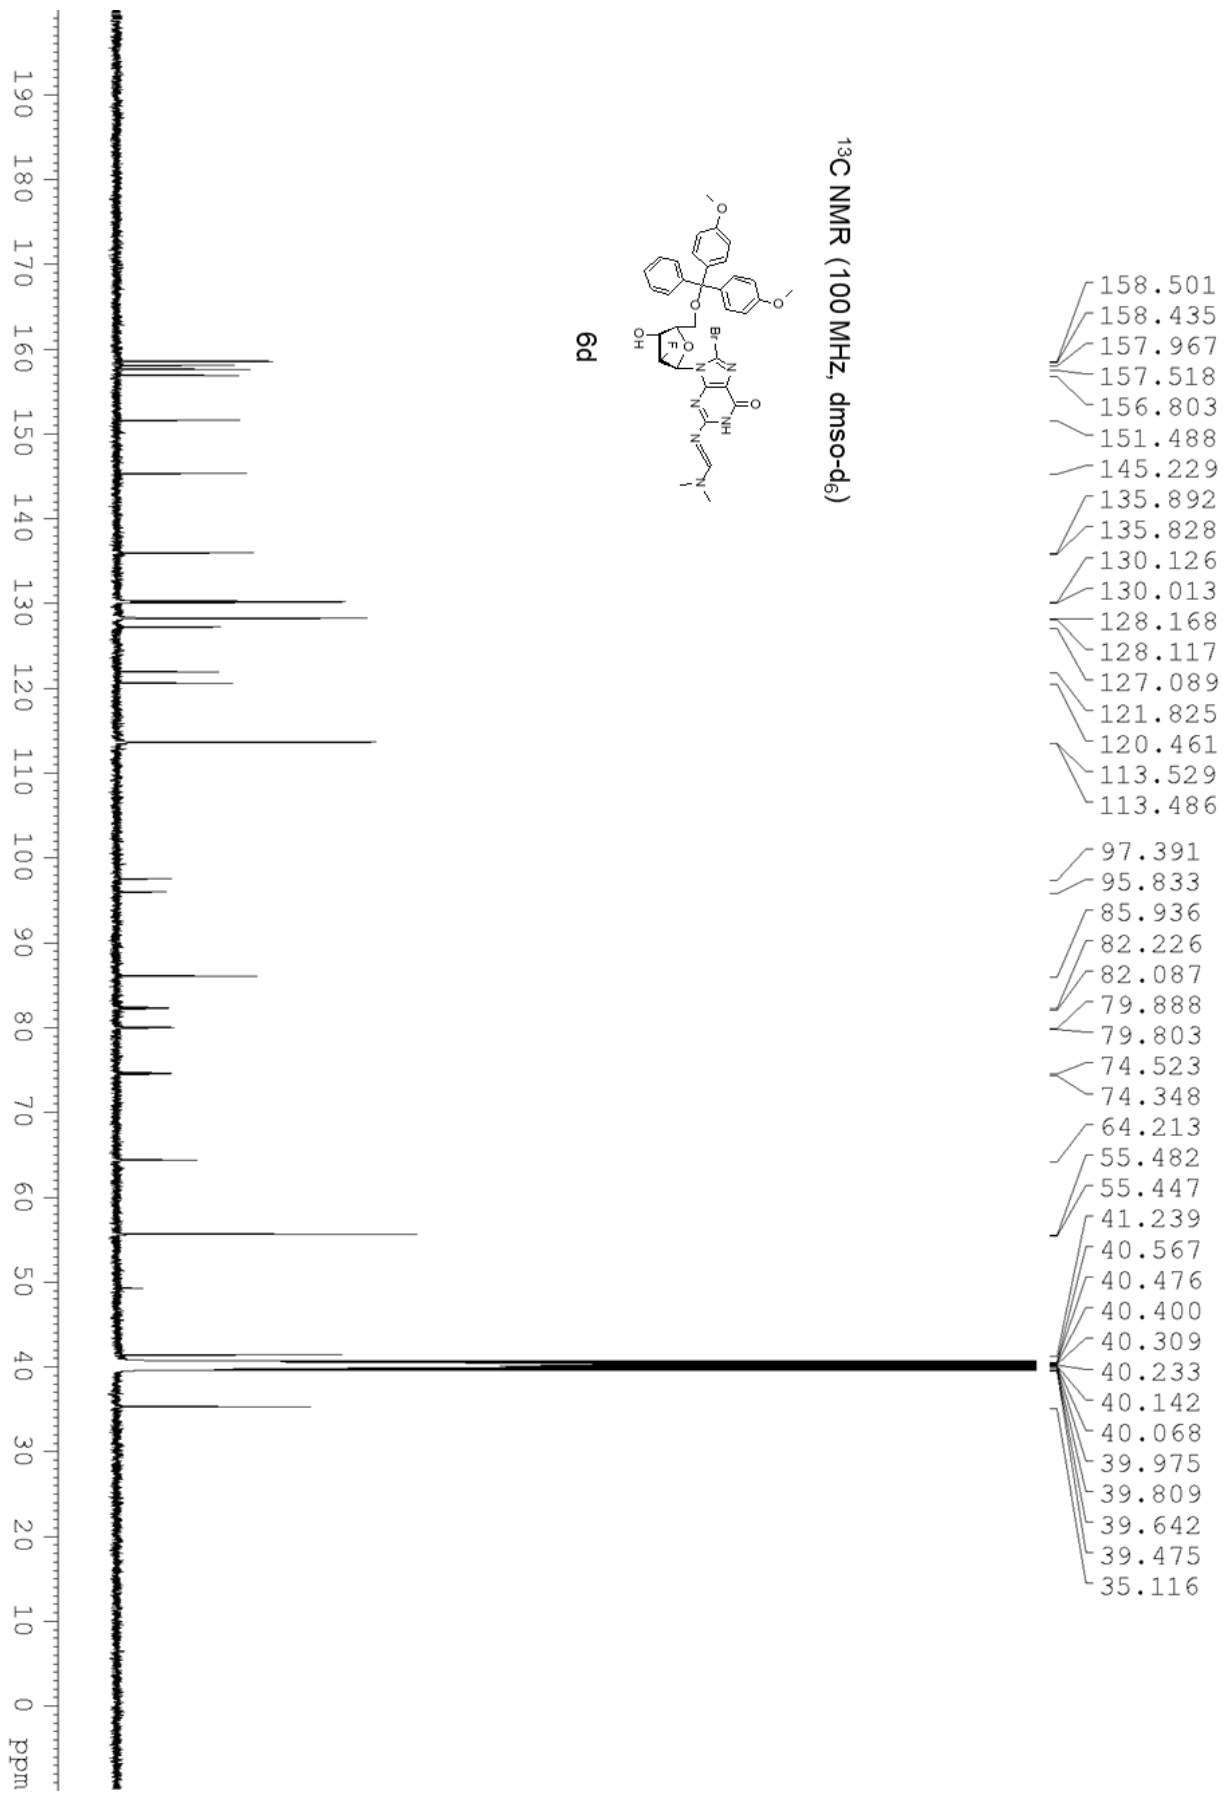

<sup>19</sup>F NMR (376 MHz, dmso-d<sub>6</sub>)

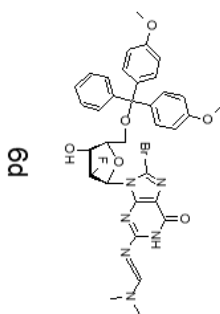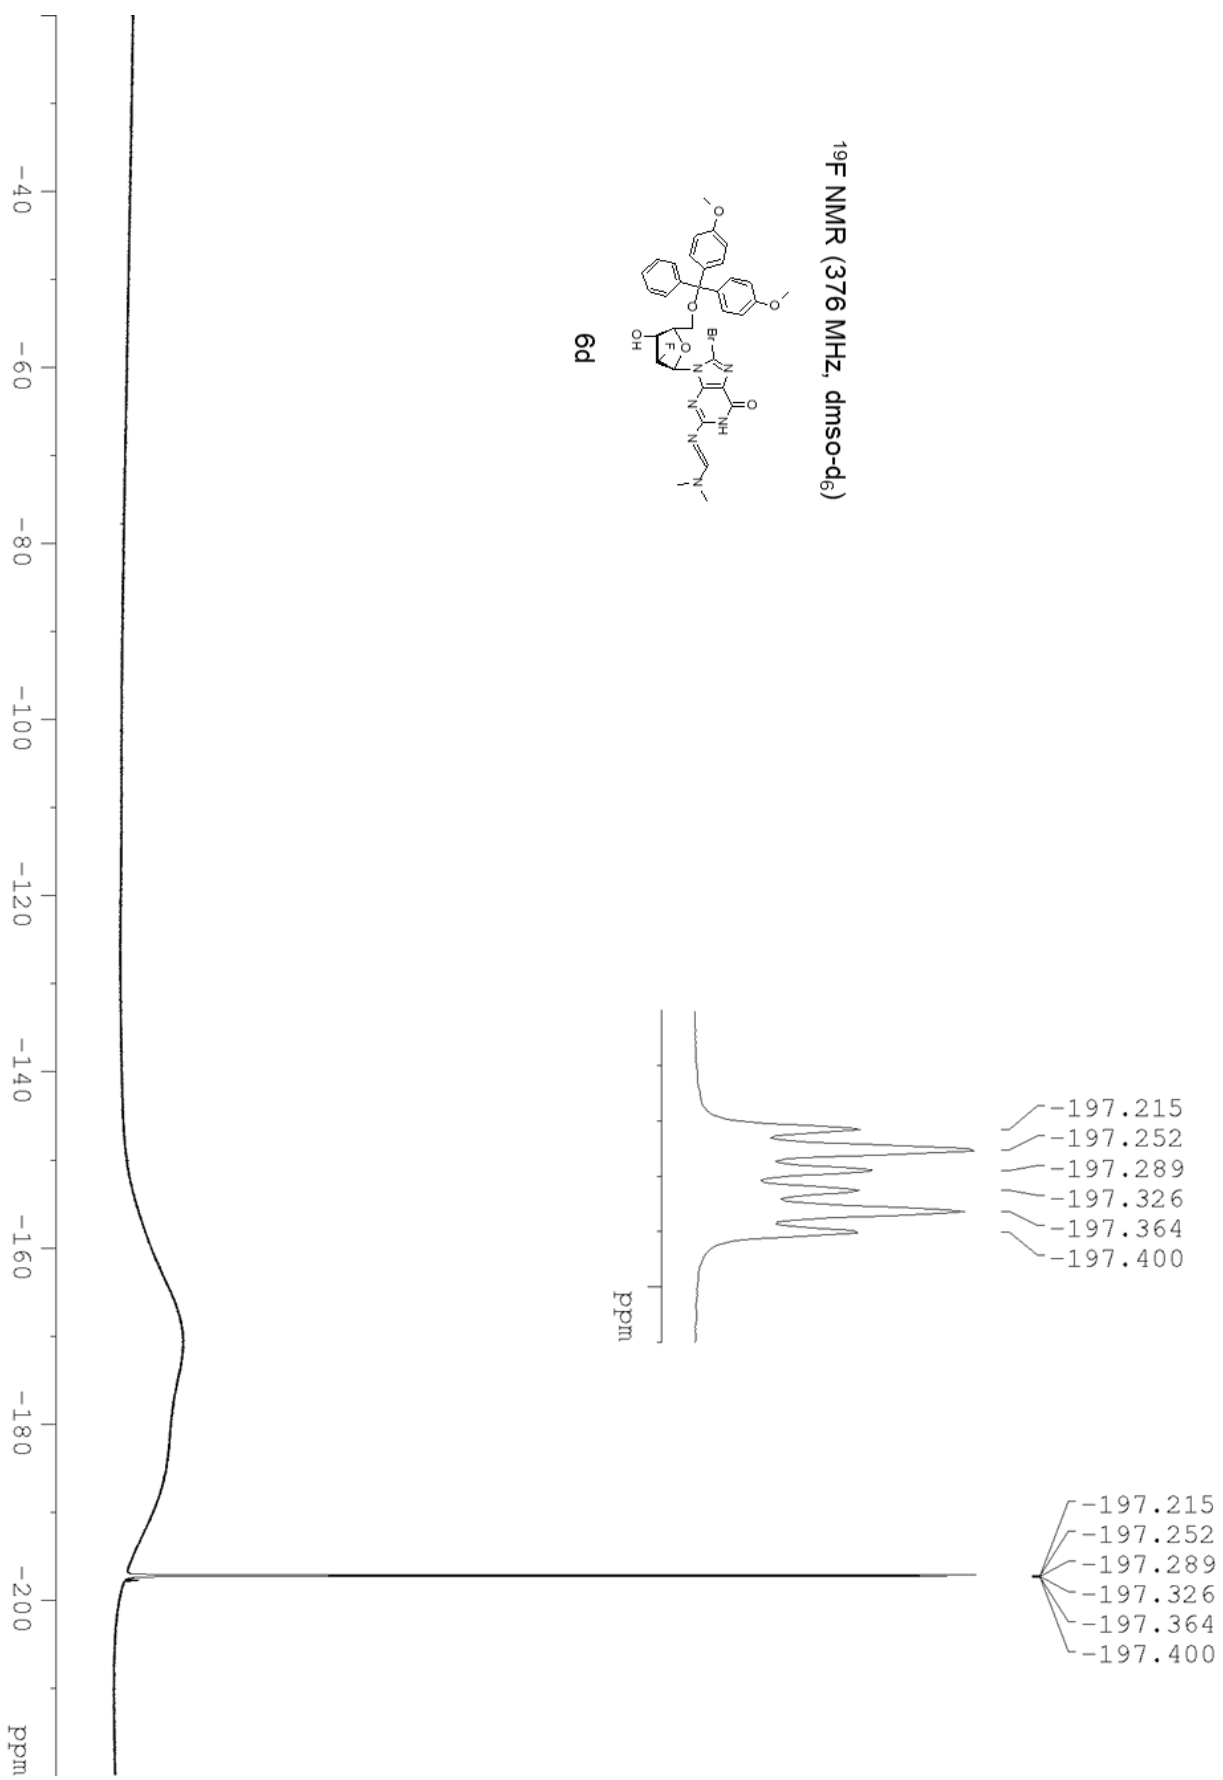

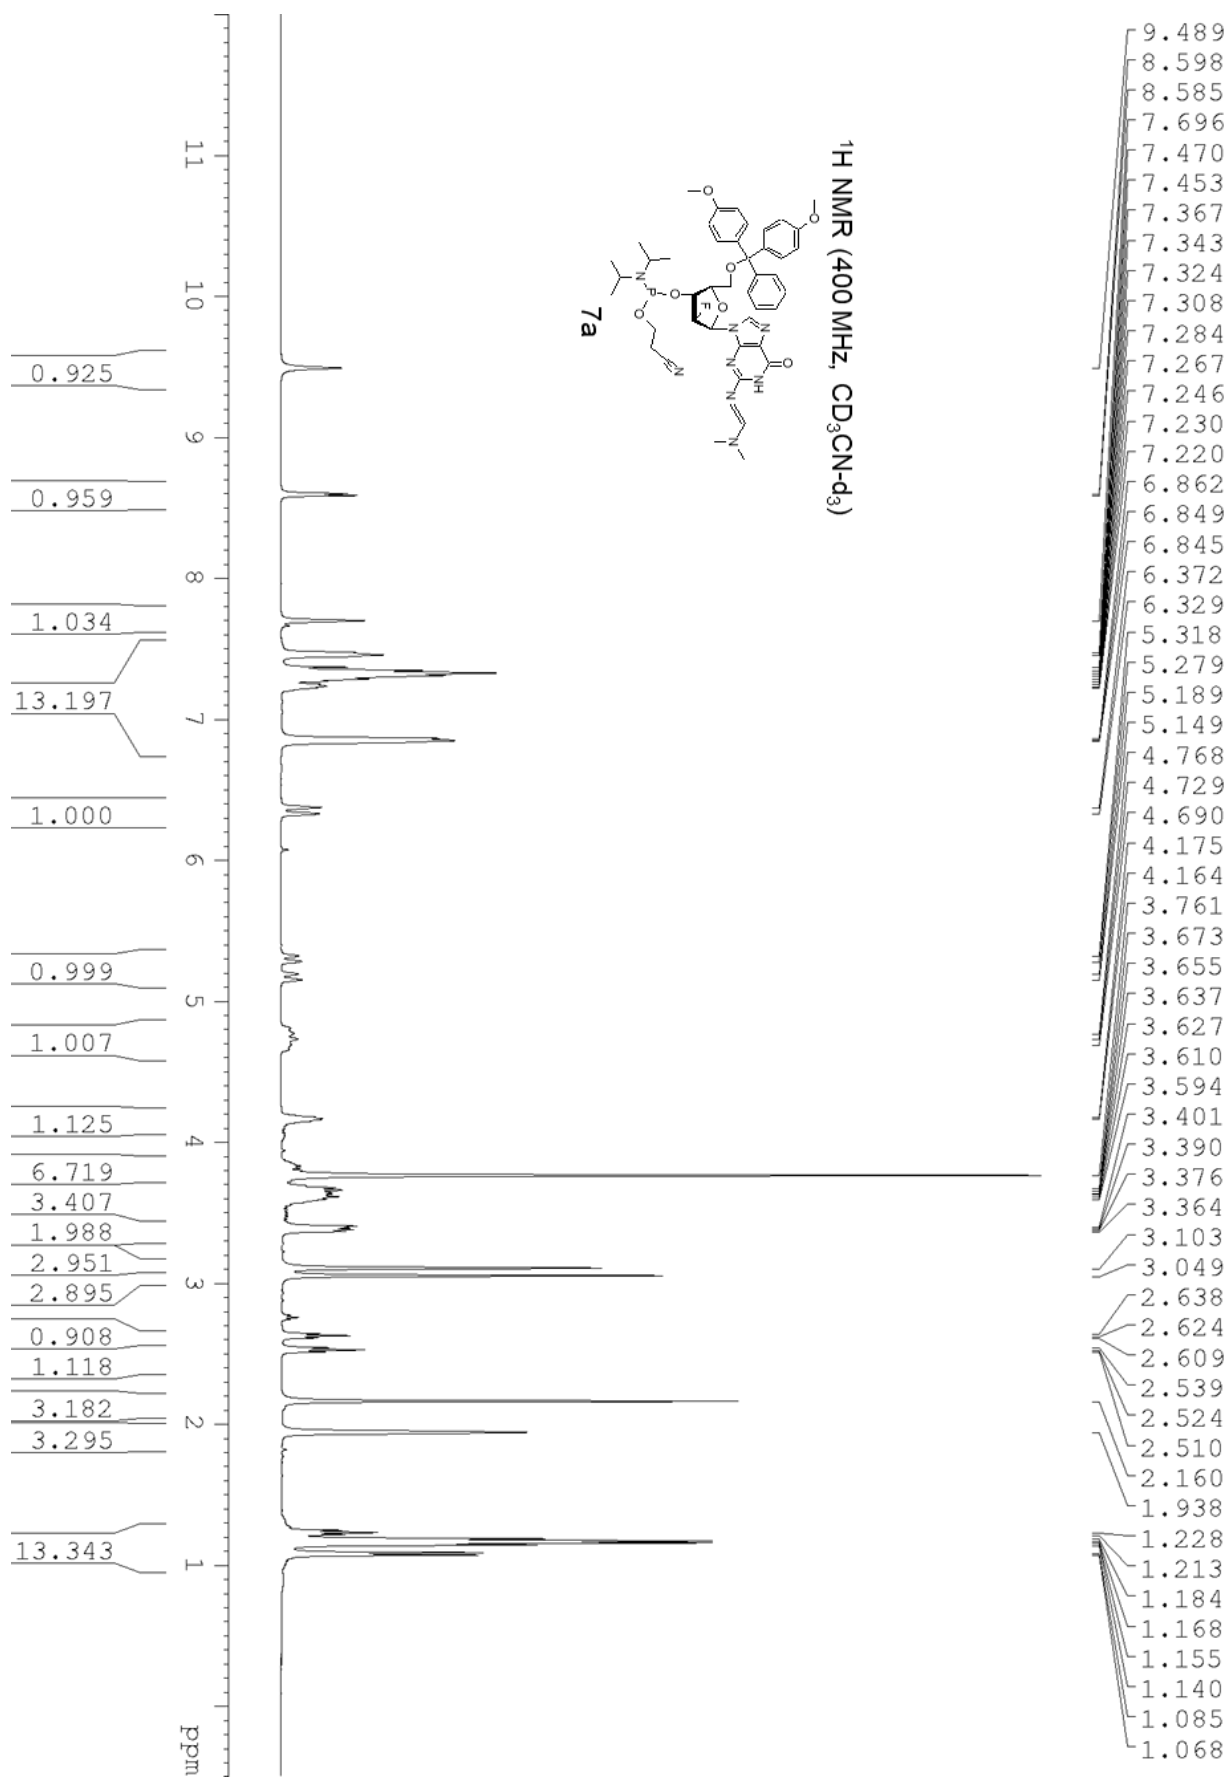

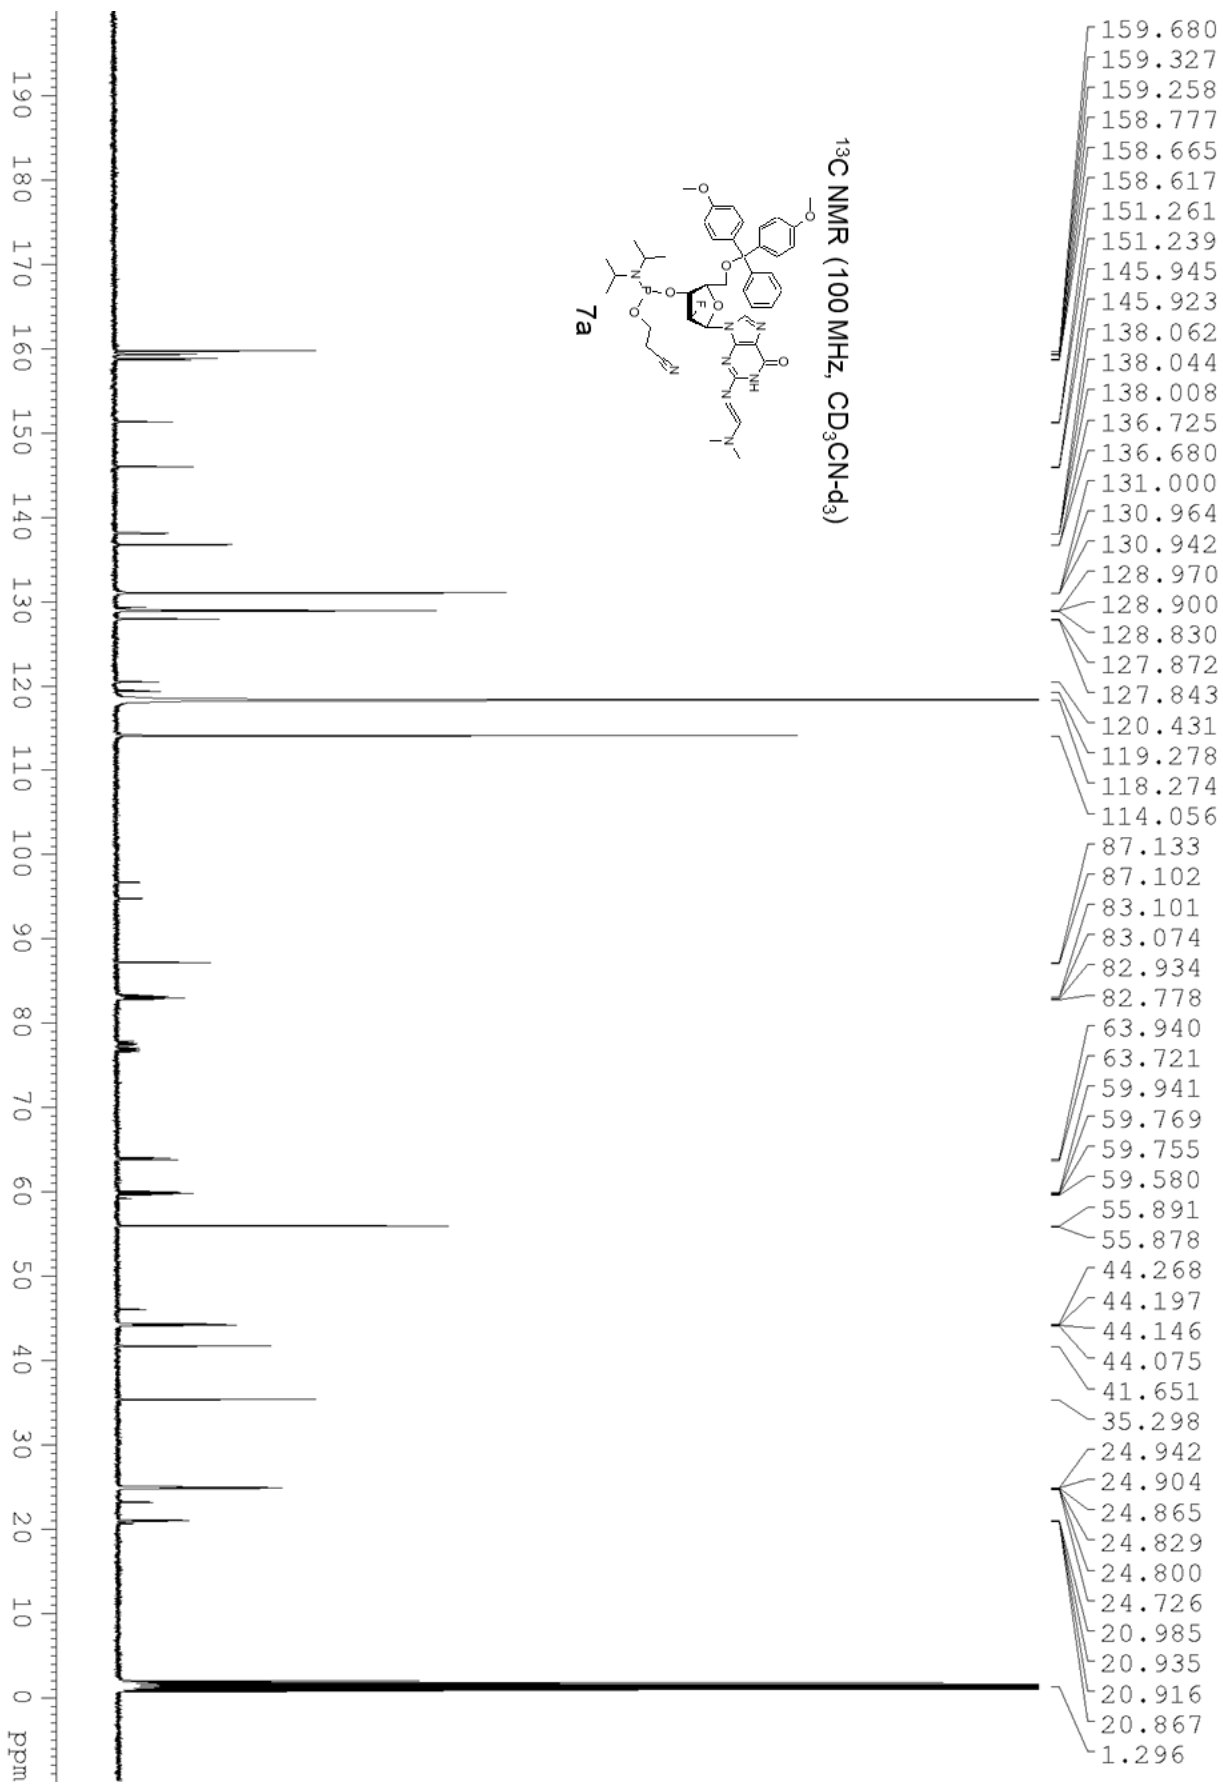

<sup>19</sup>F NMR (470 MHz, CD<sub>3</sub>CN-d<sub>3</sub>)

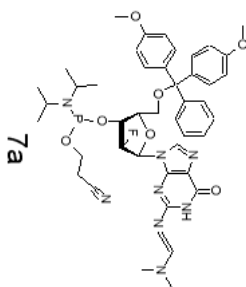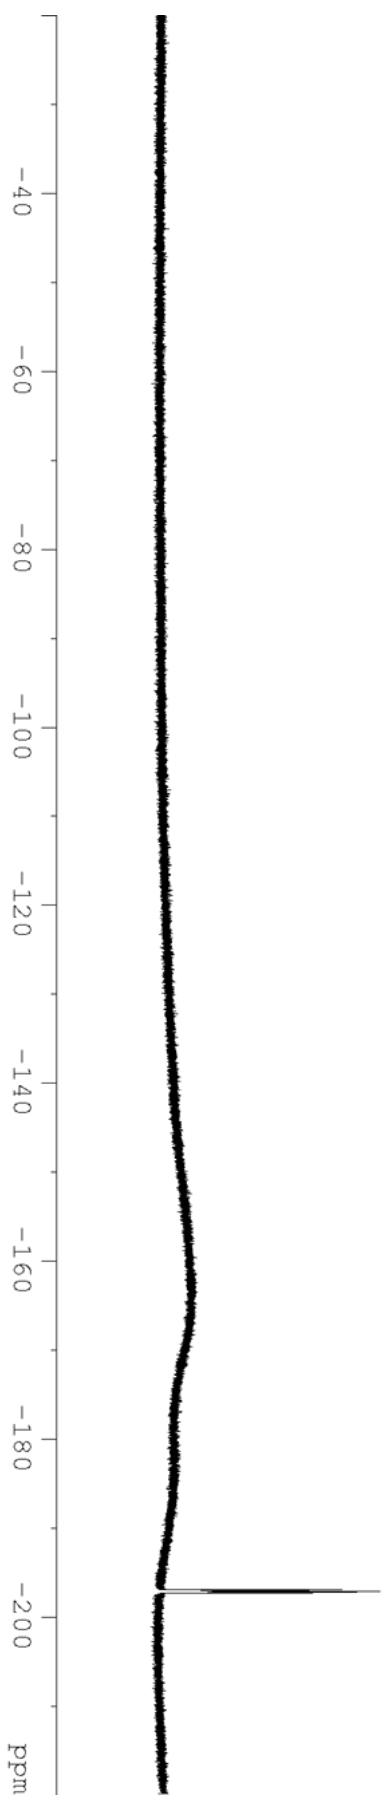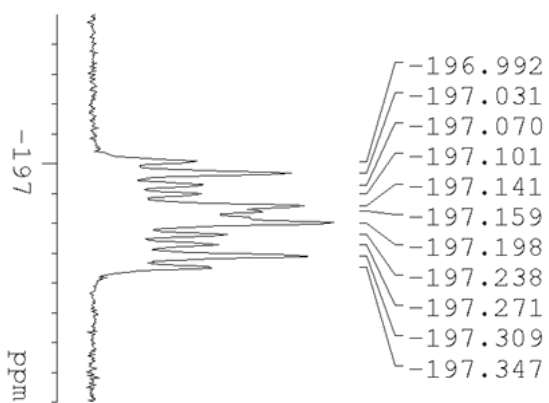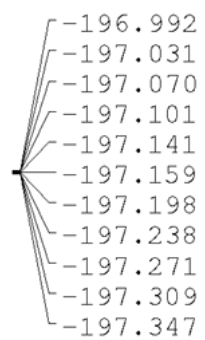

<sup>31</sup>P NMR (162 MHz, CD<sub>3</sub>CN-d<sub>3</sub>)

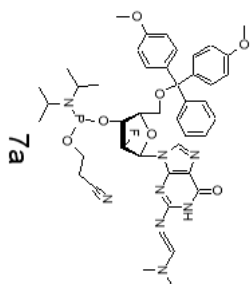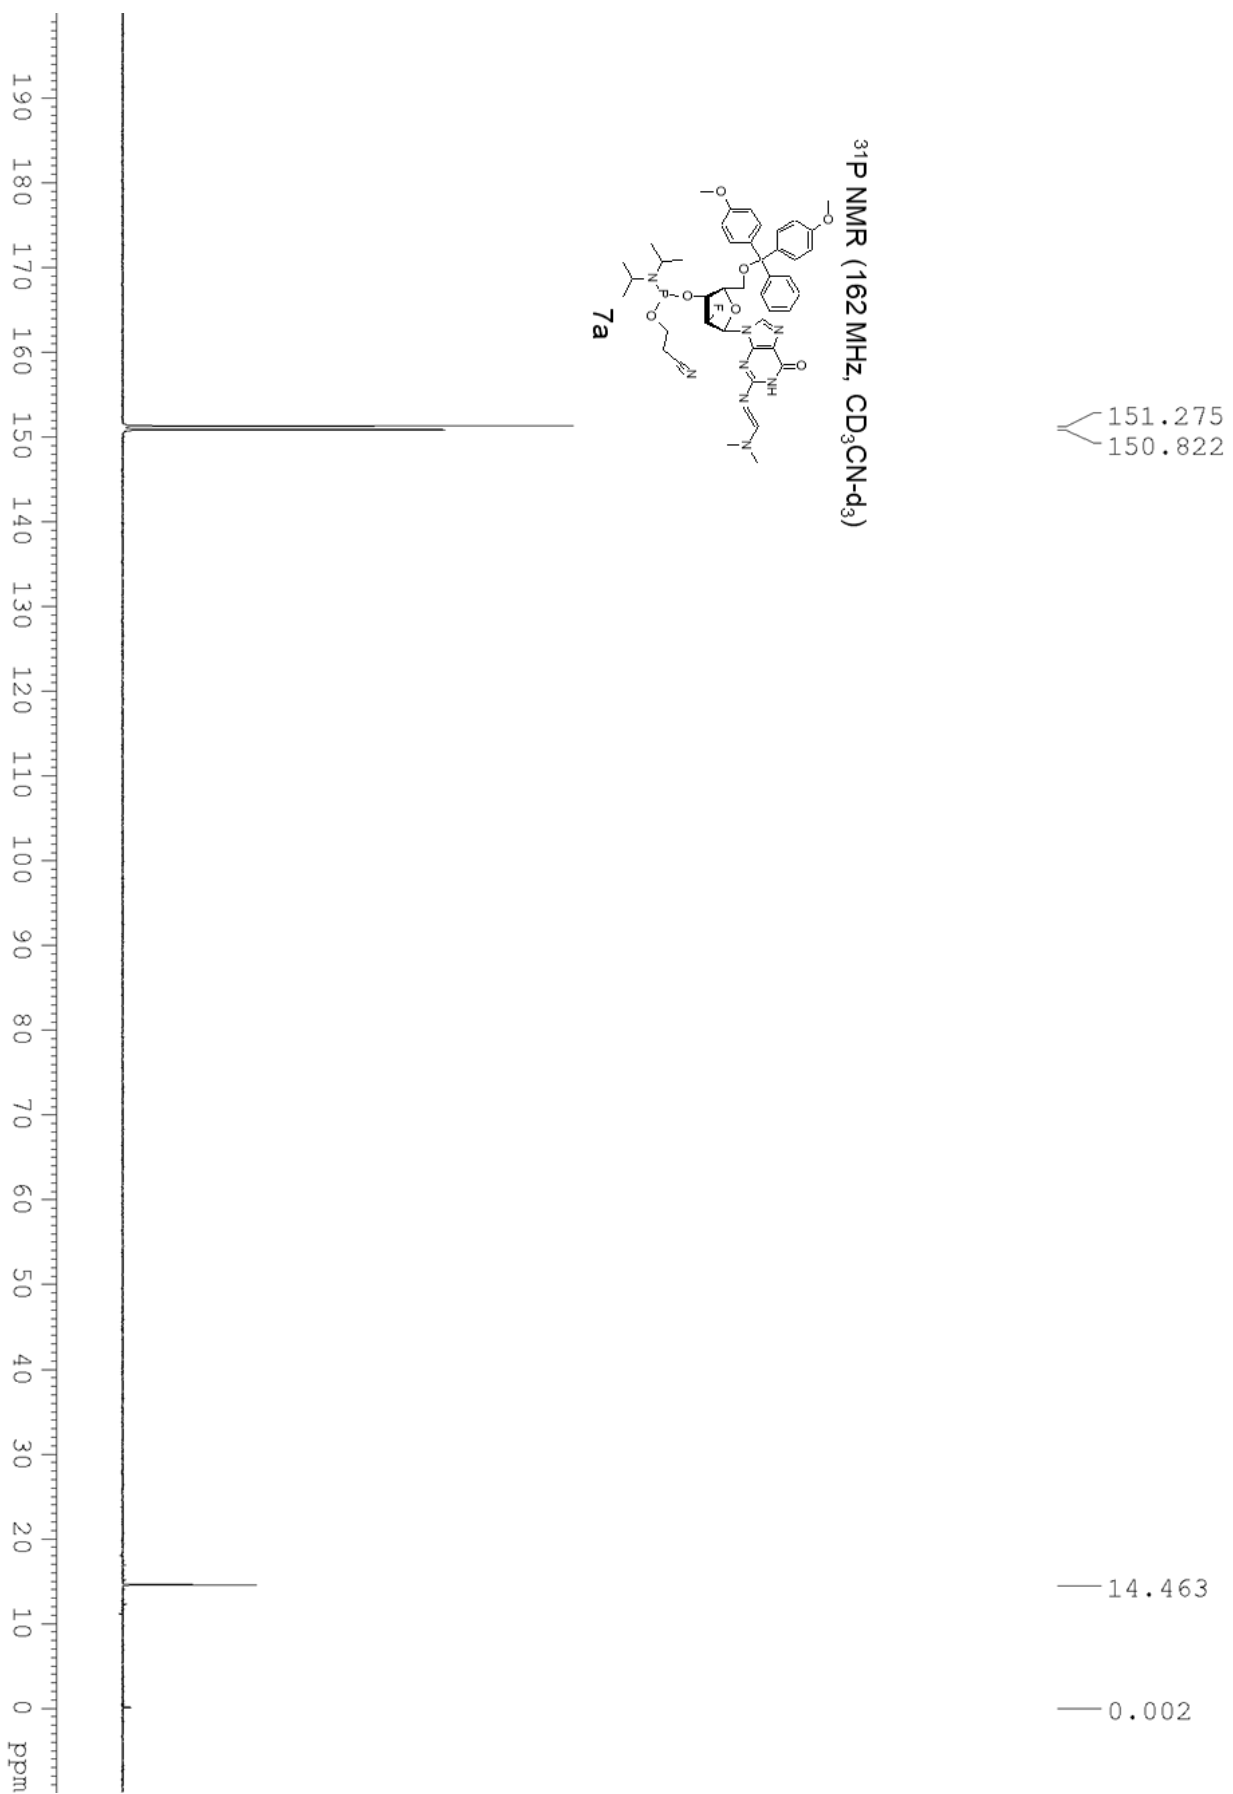

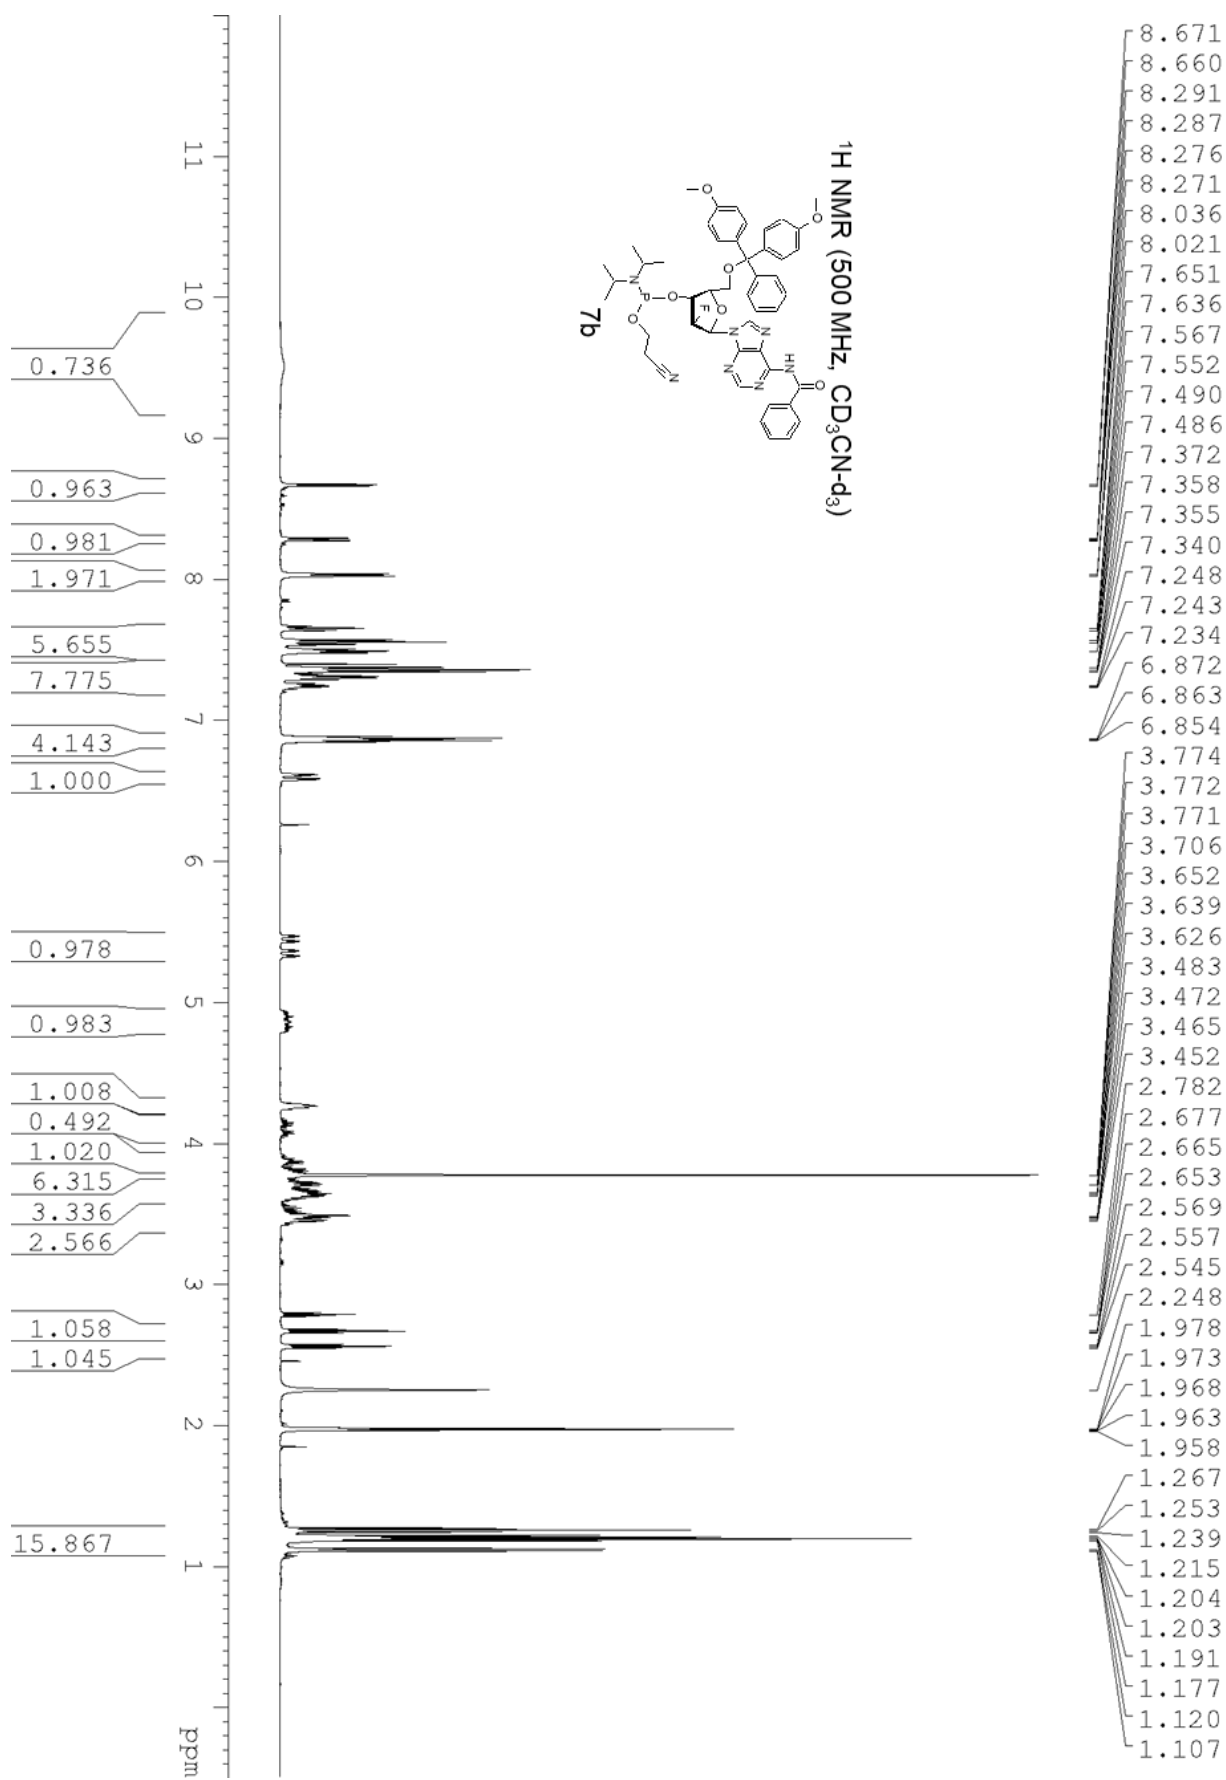



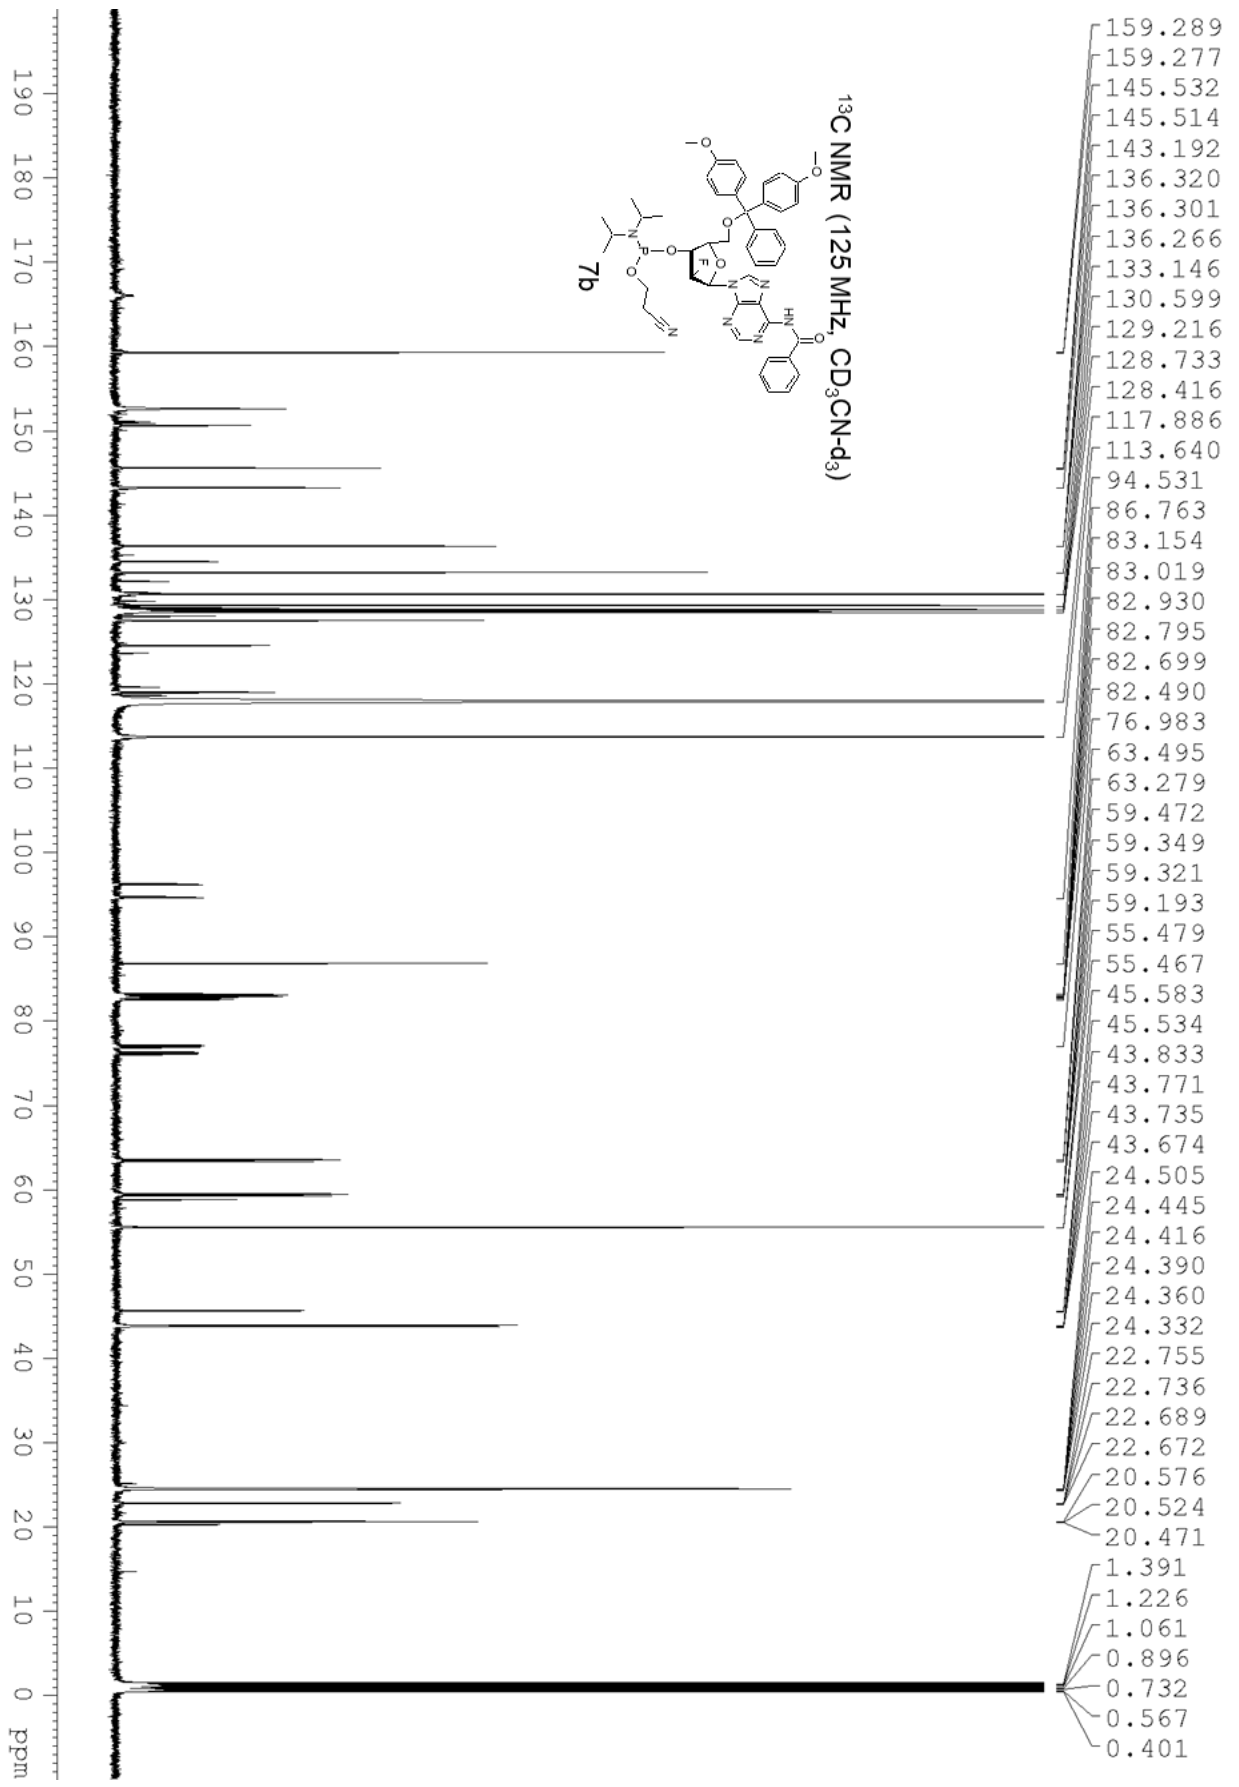

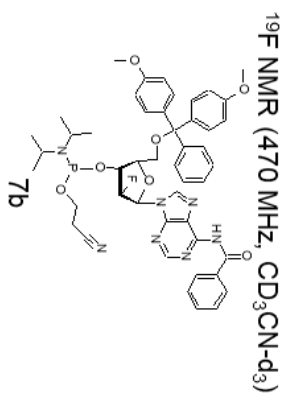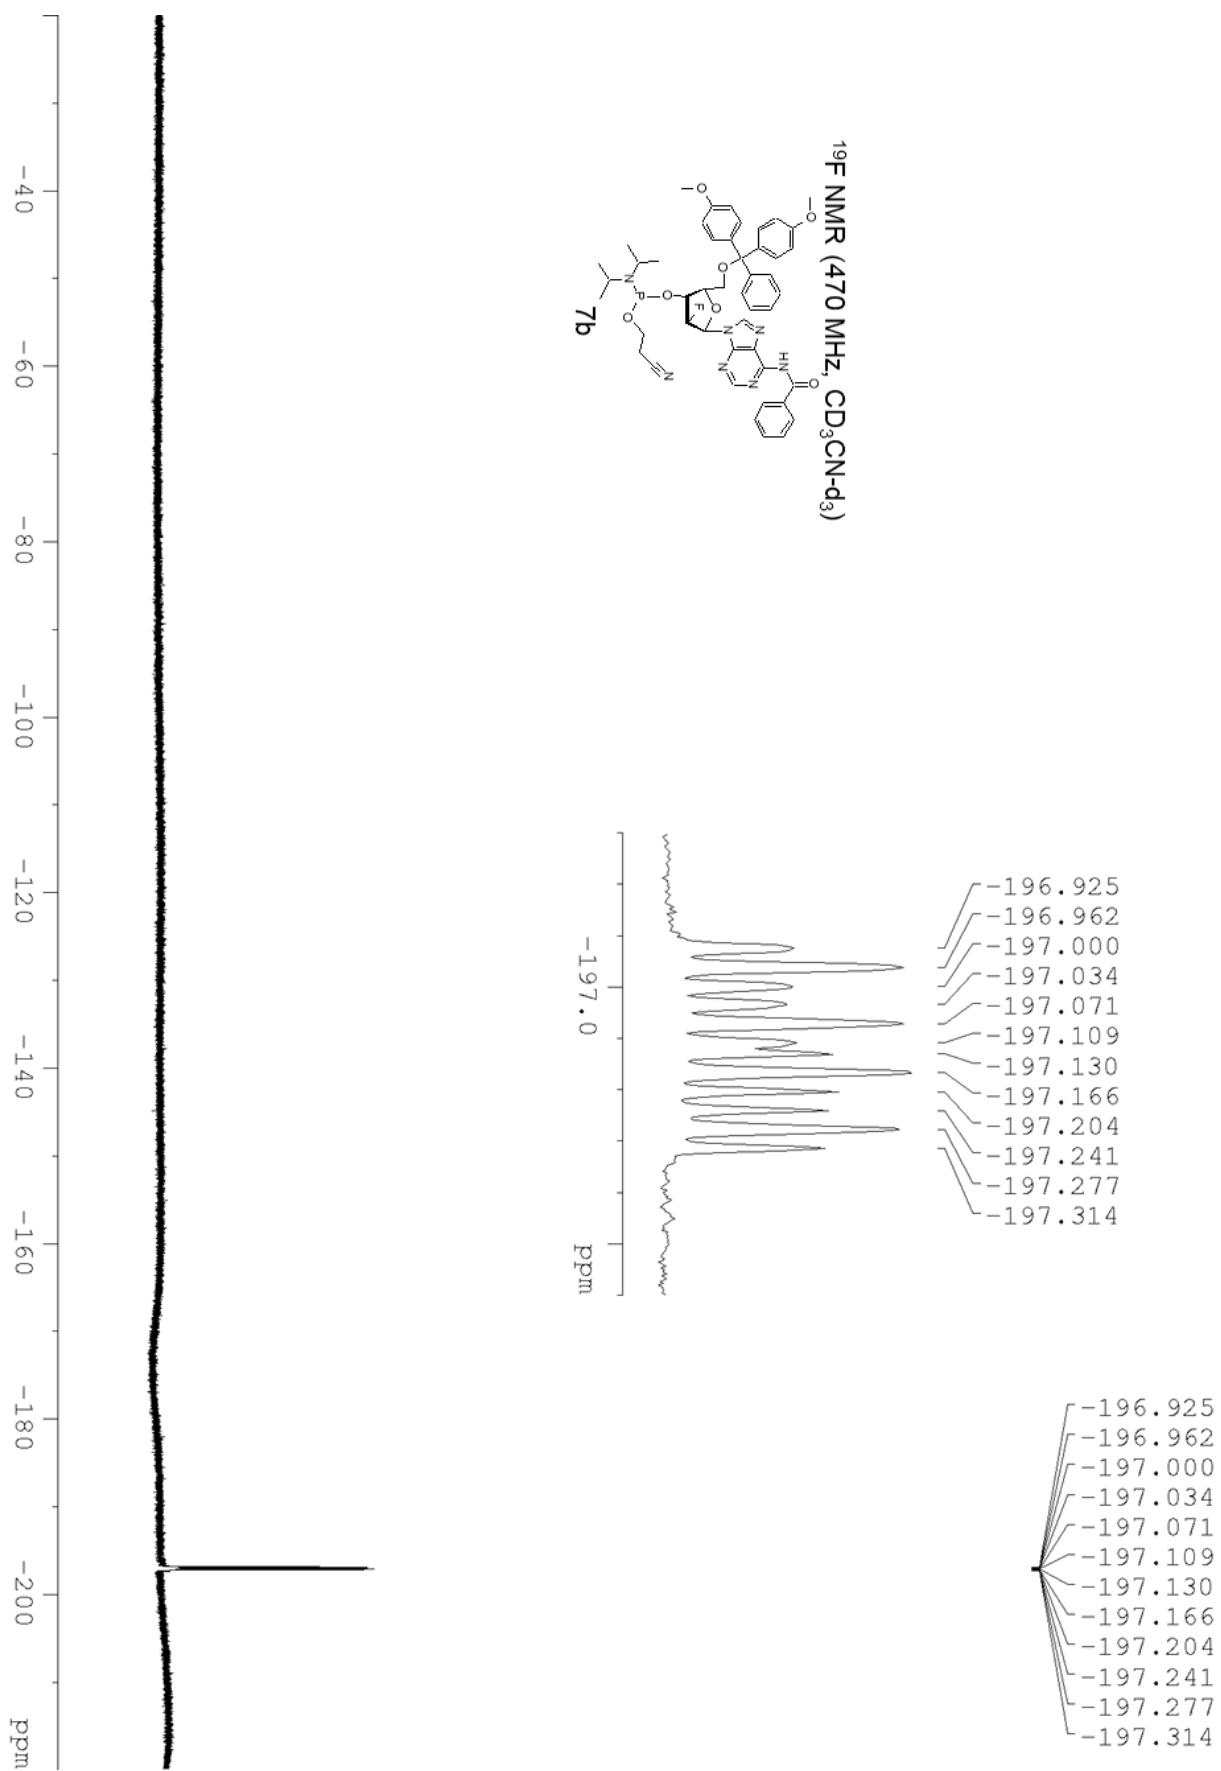

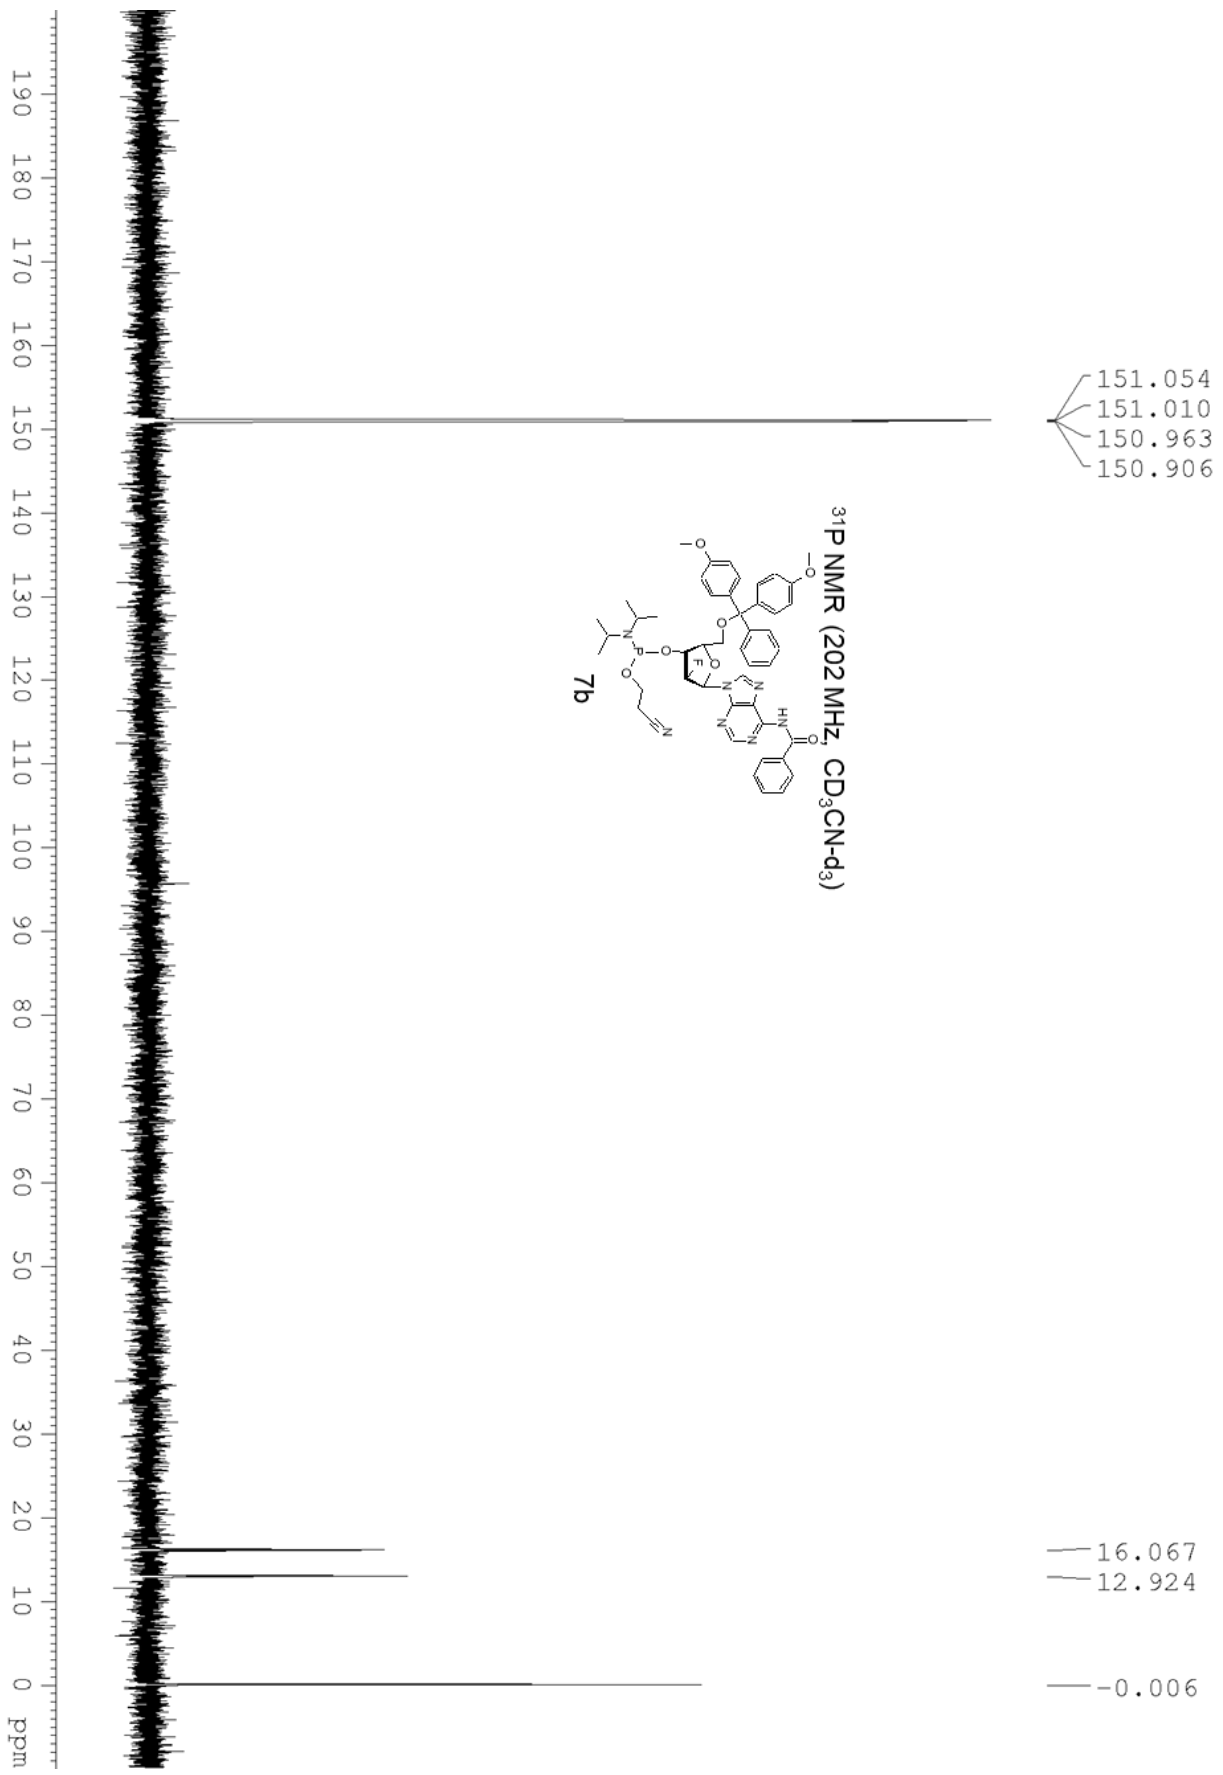

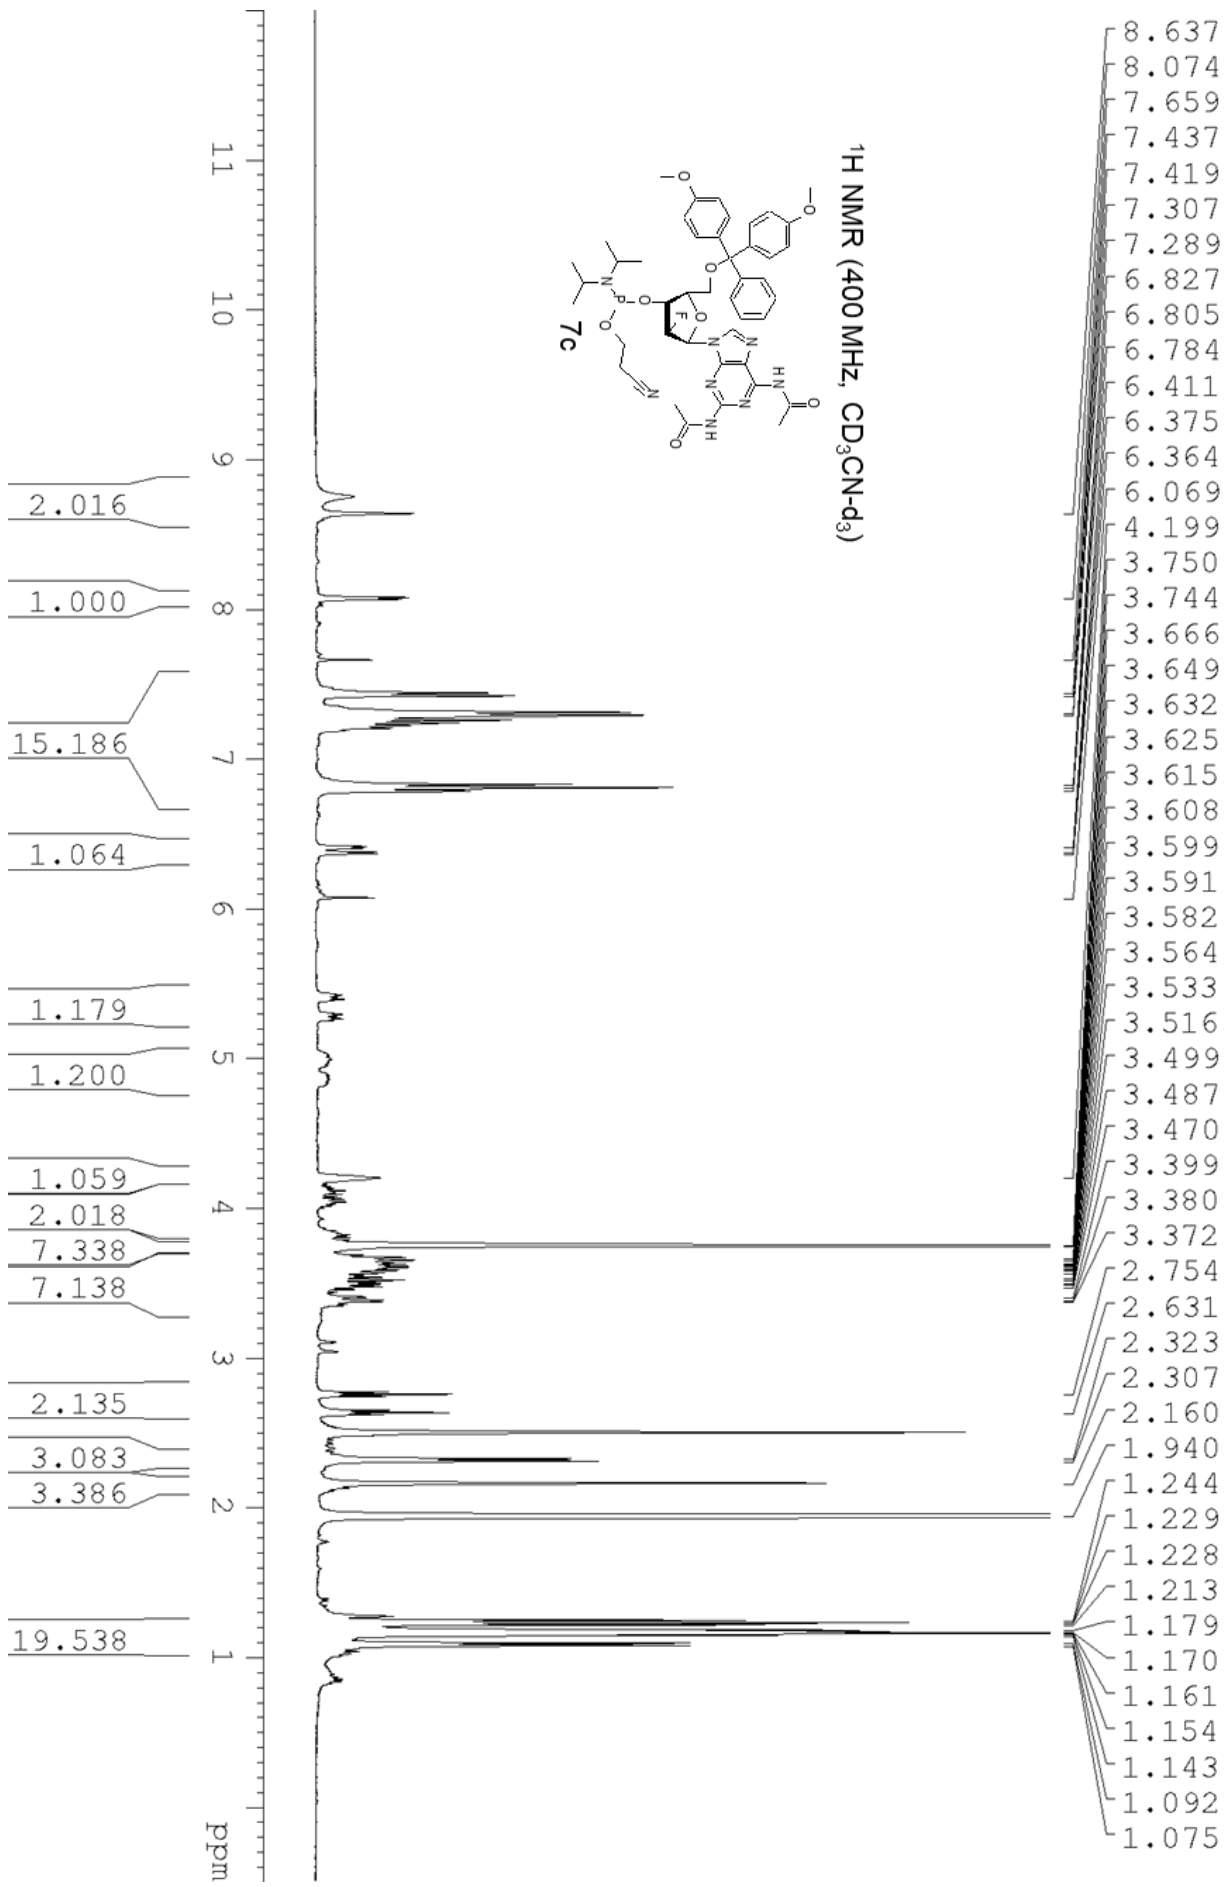

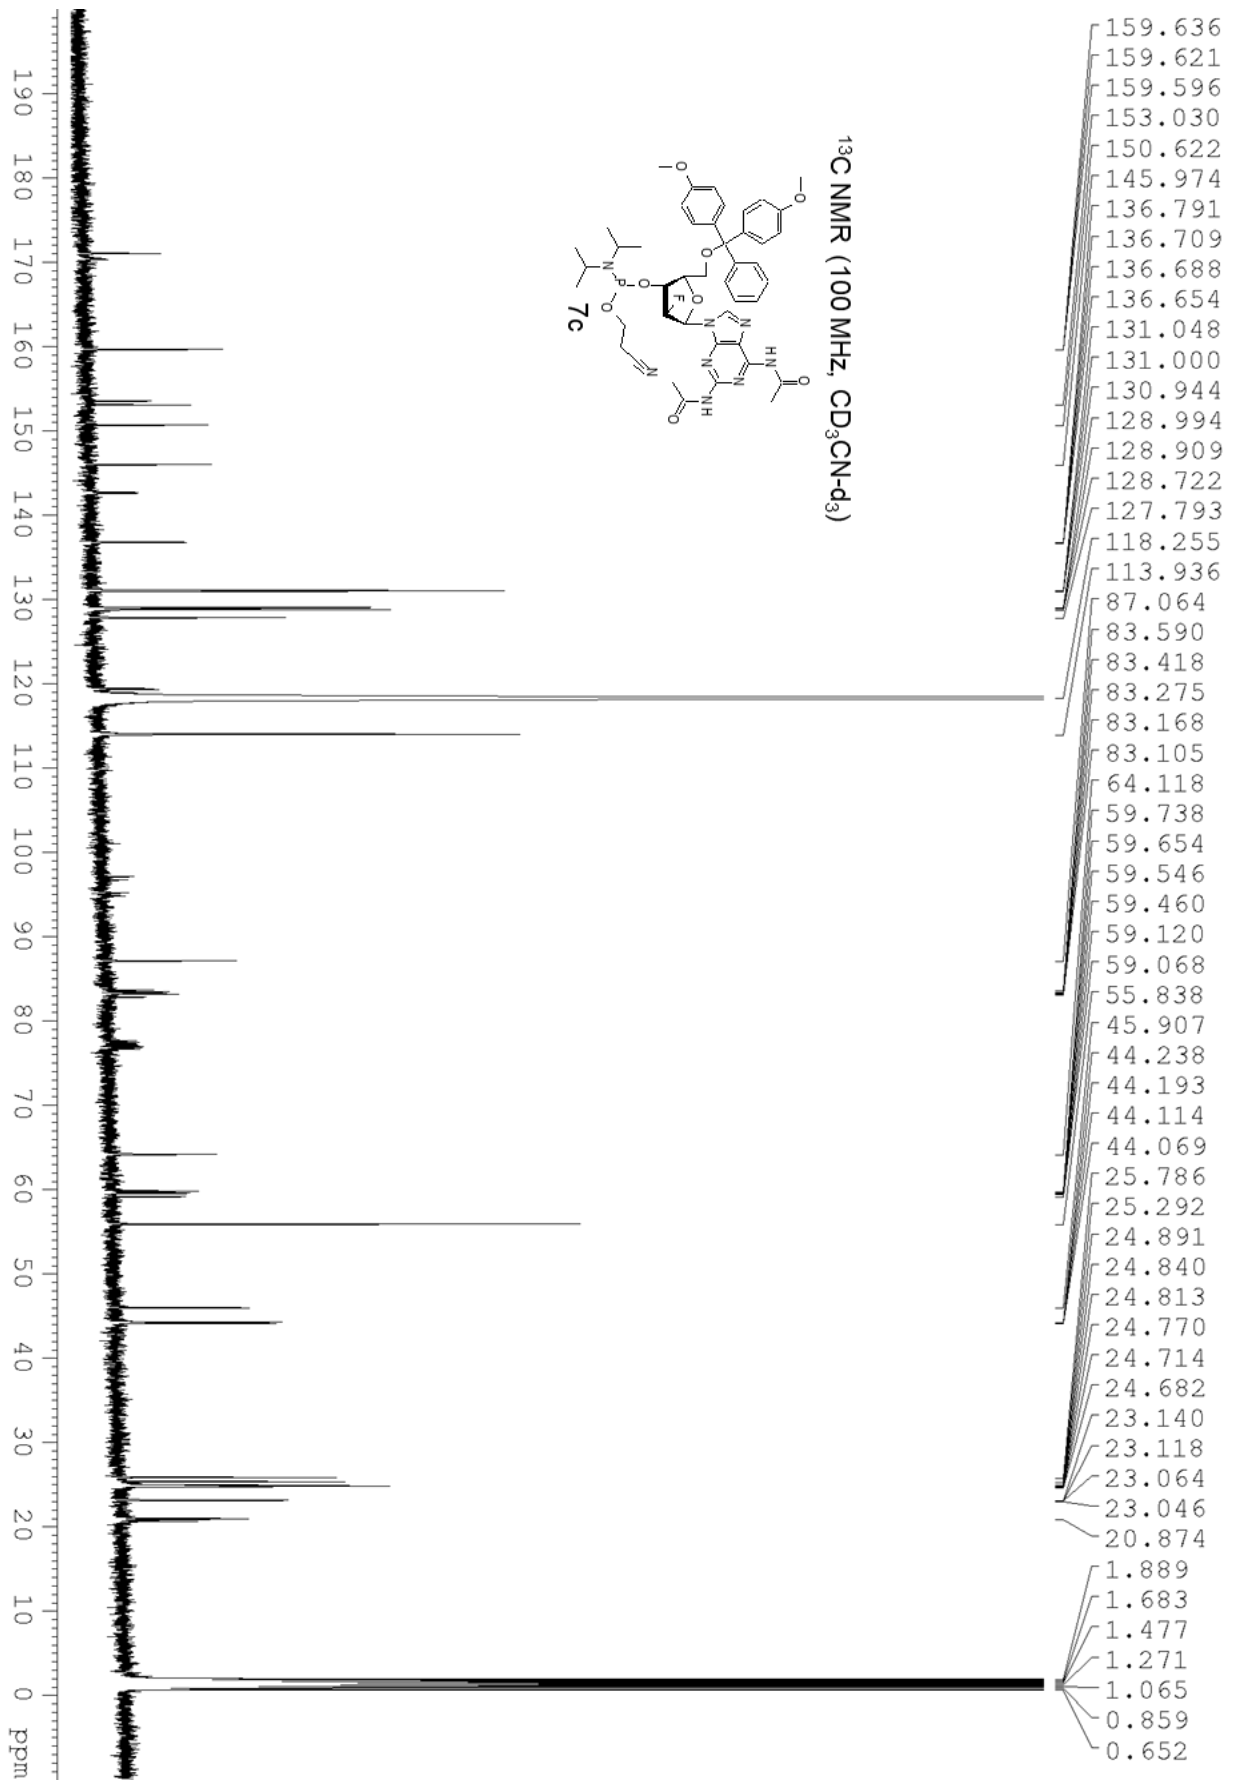

<sup>19</sup>F NMR (376 MHz, CD<sub>3</sub>CN-d<sub>3</sub>)

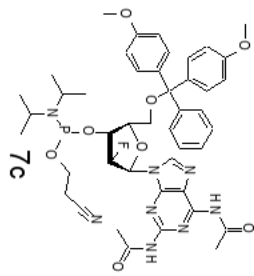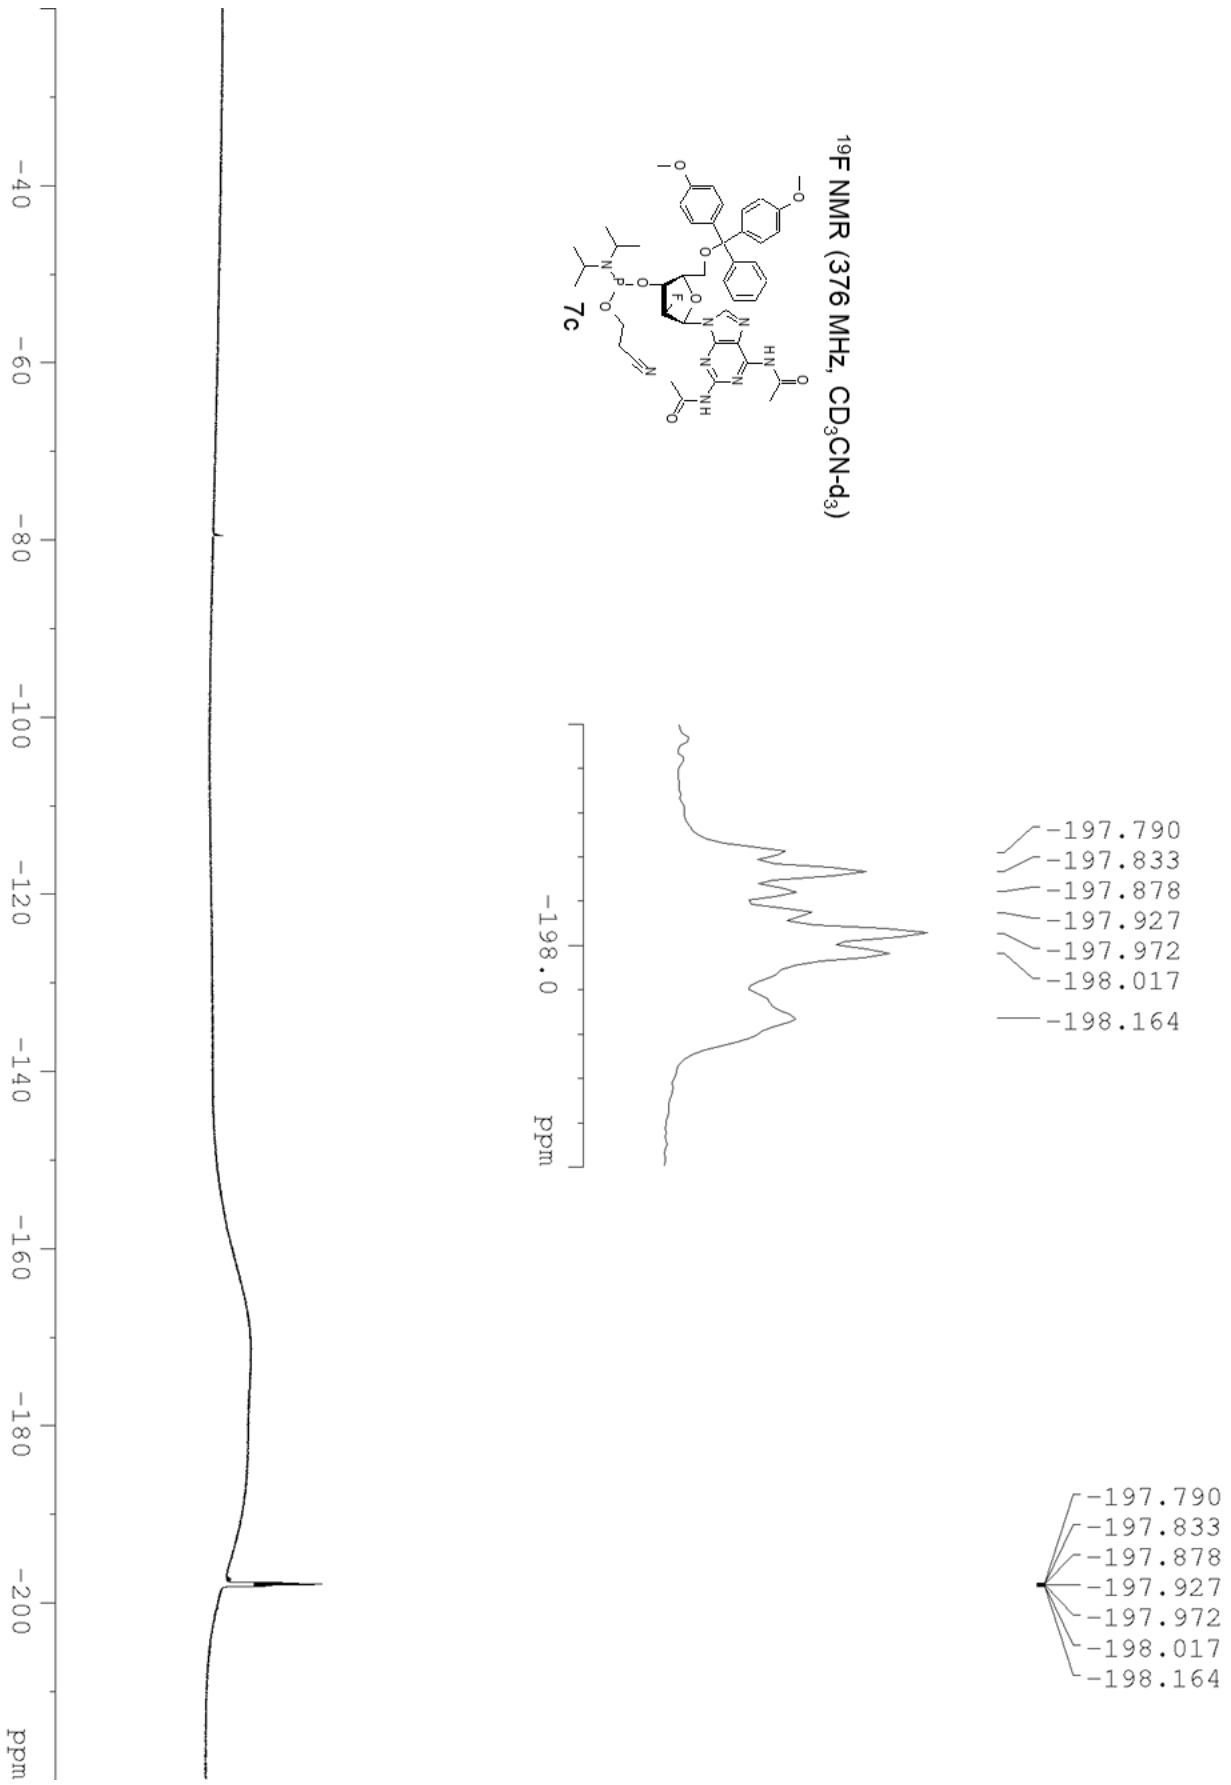

151.125  
150.960

— 14.474

— -0.003

<sup>31</sup>P NMR (162 MHz, CD<sub>3</sub>CN-d<sub>3</sub>)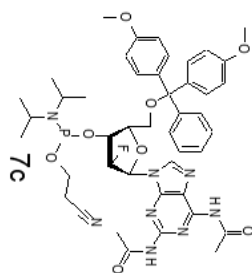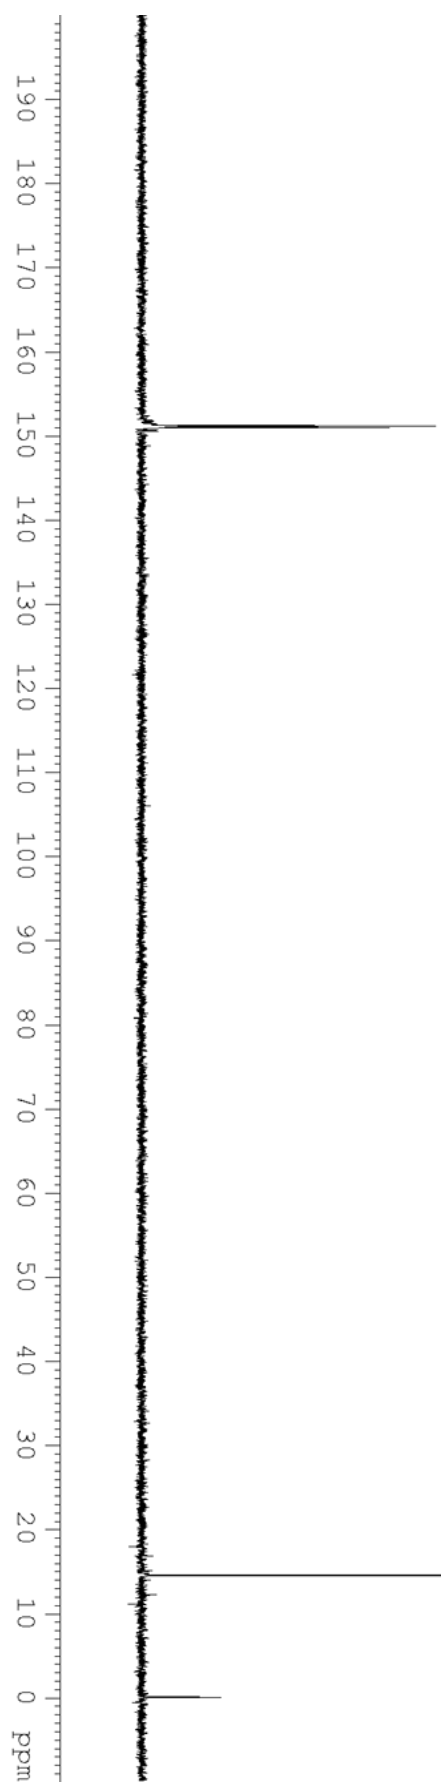

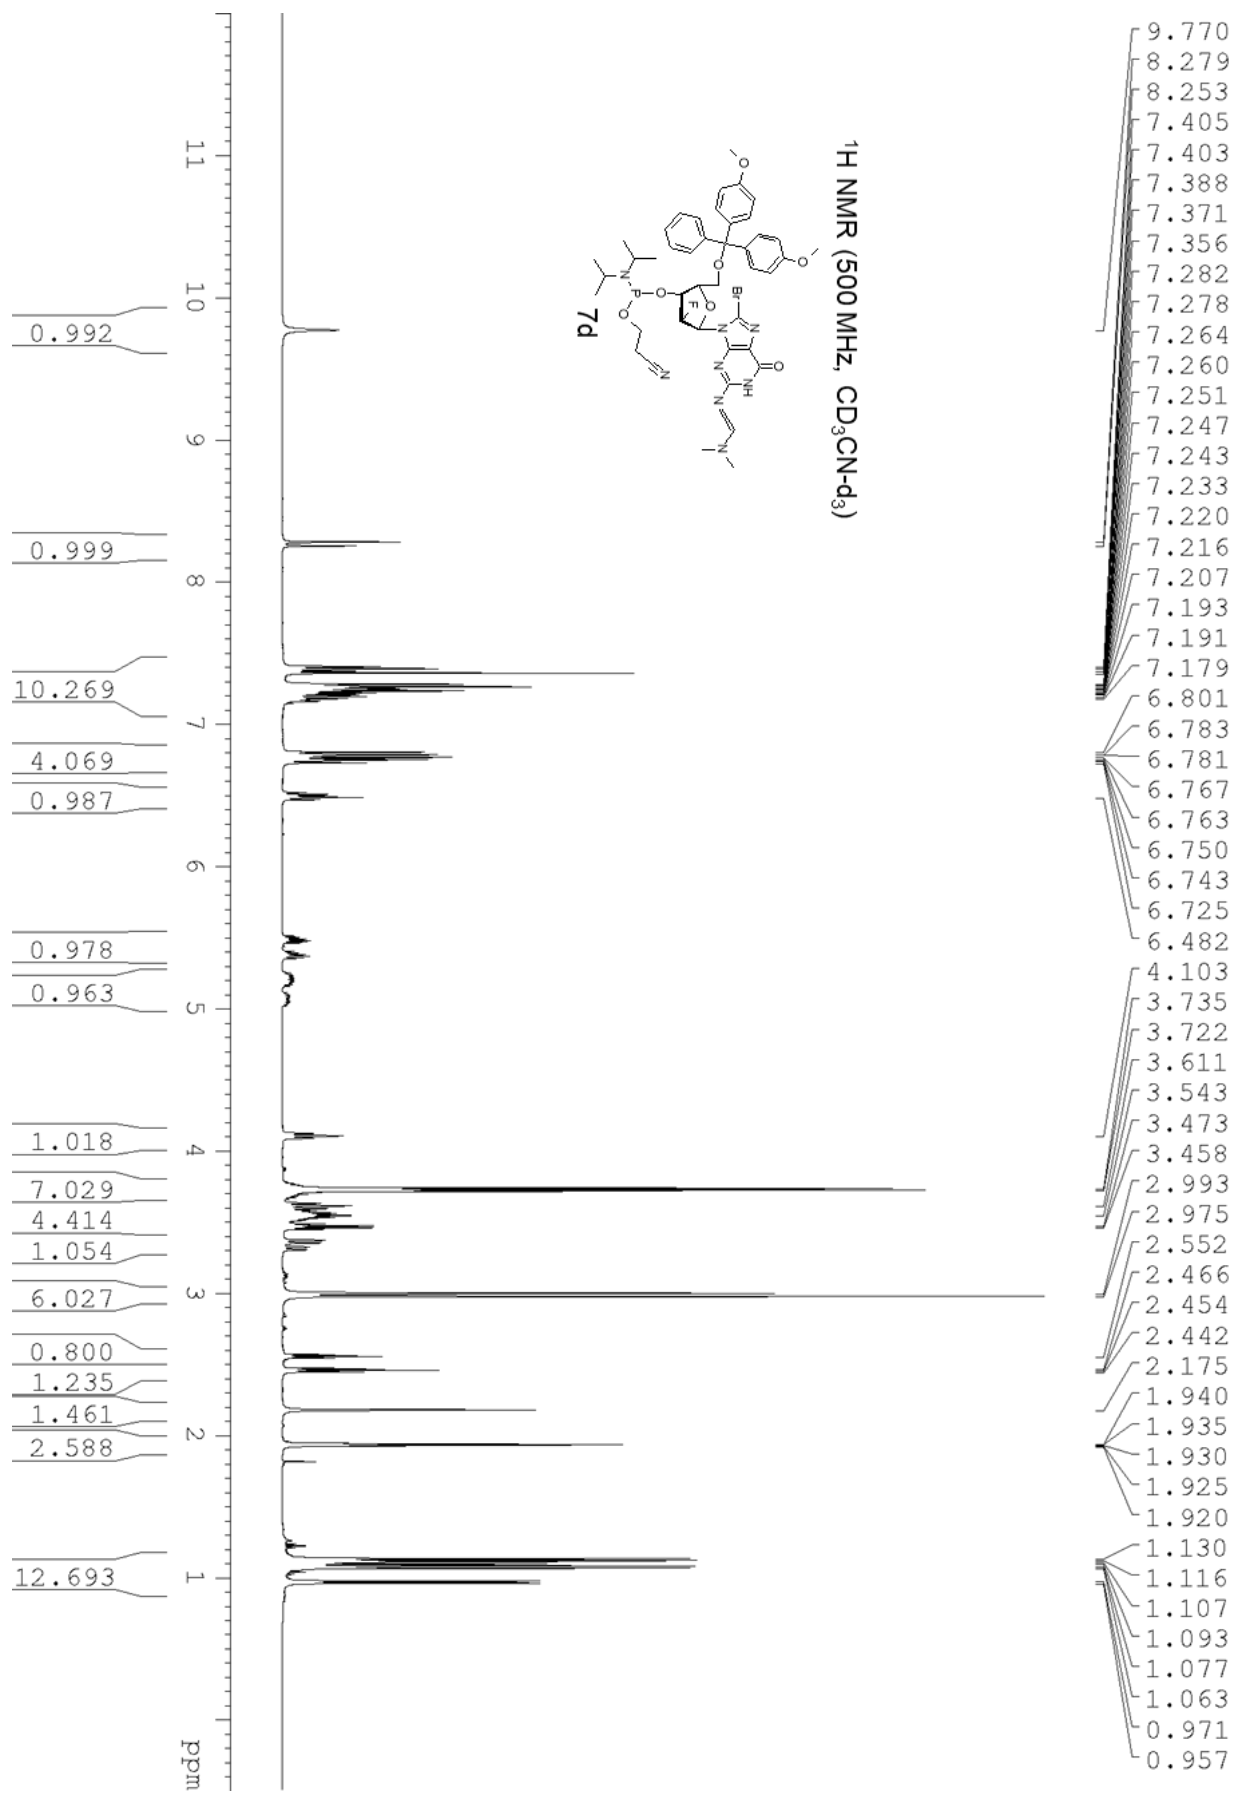



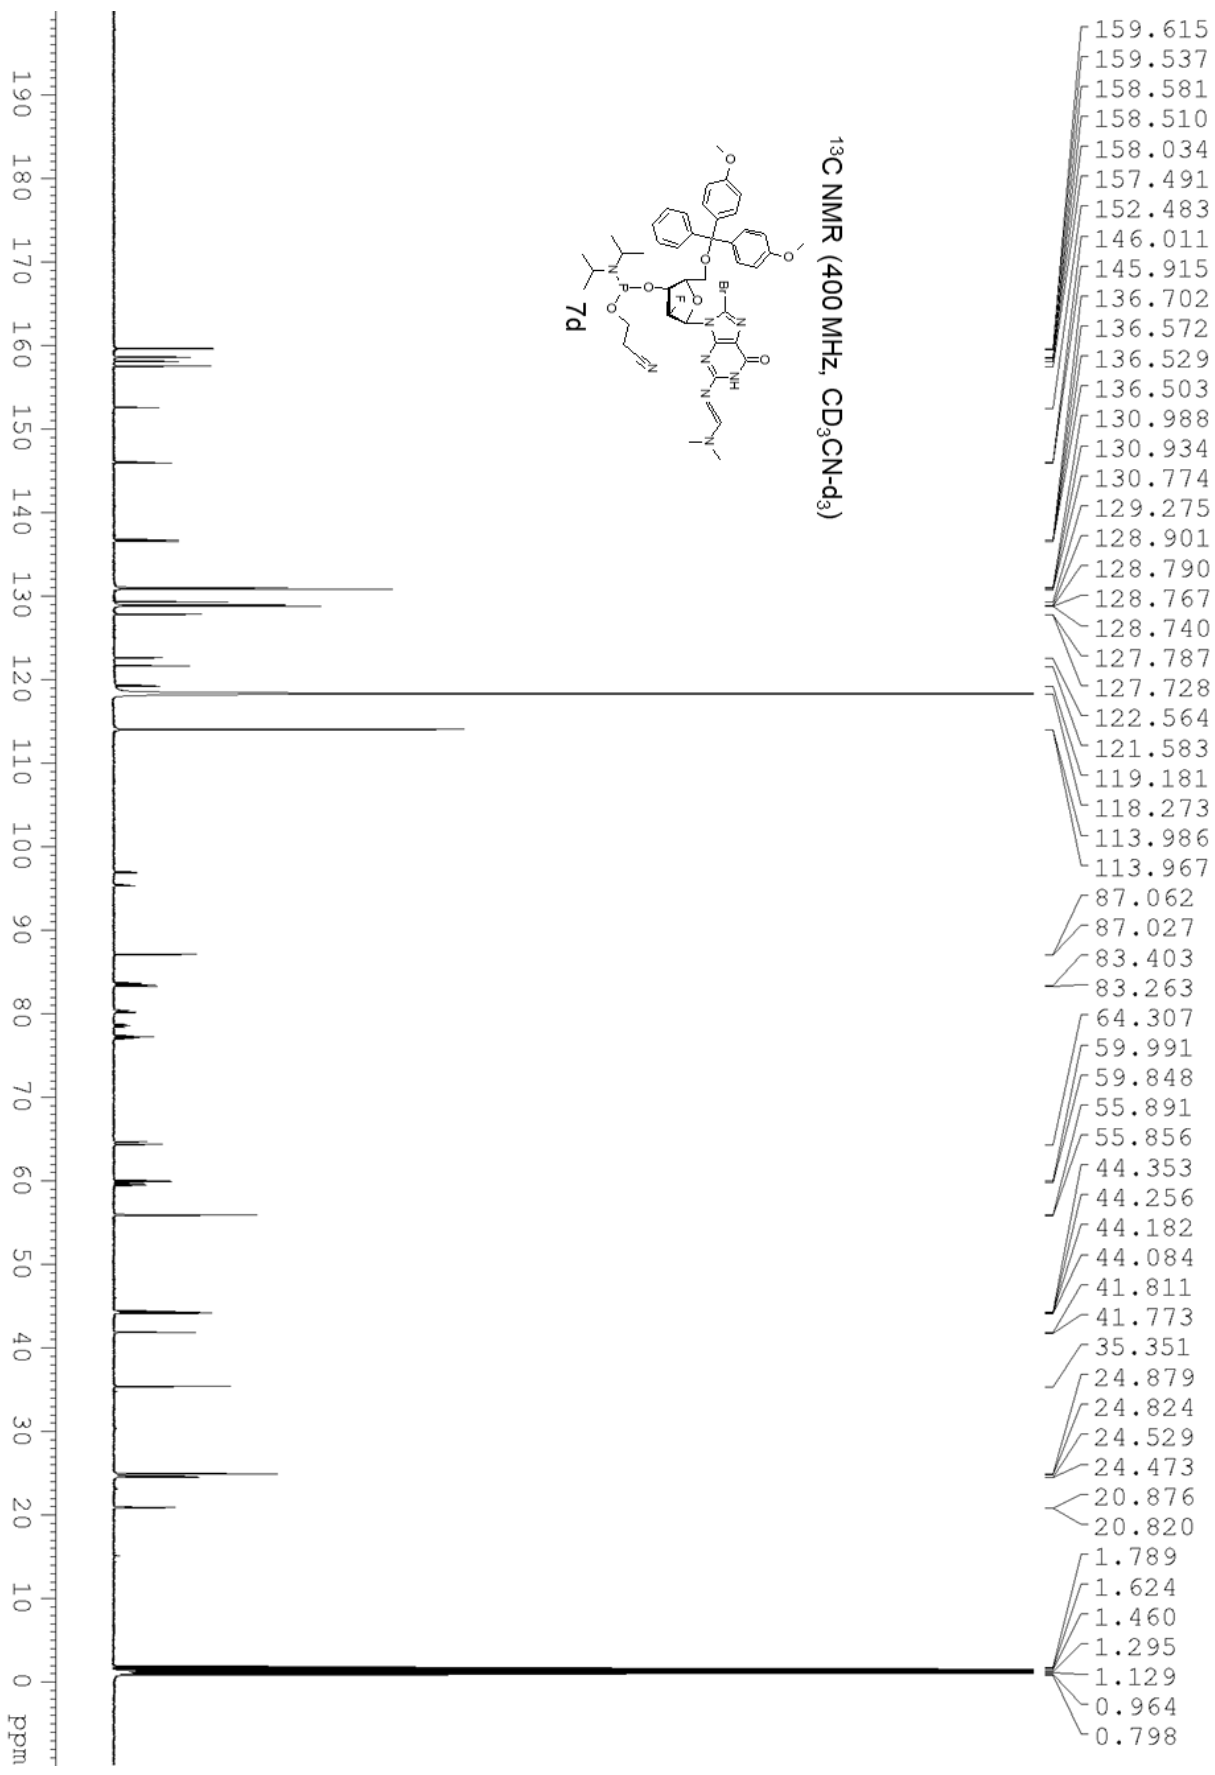

$^{19}\text{F}$  NMR (470 MHz,  $\text{CD}_3\text{CN-d}_3$ )

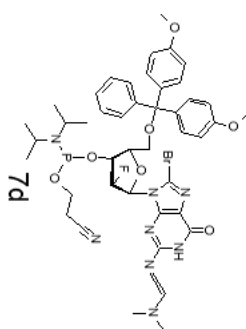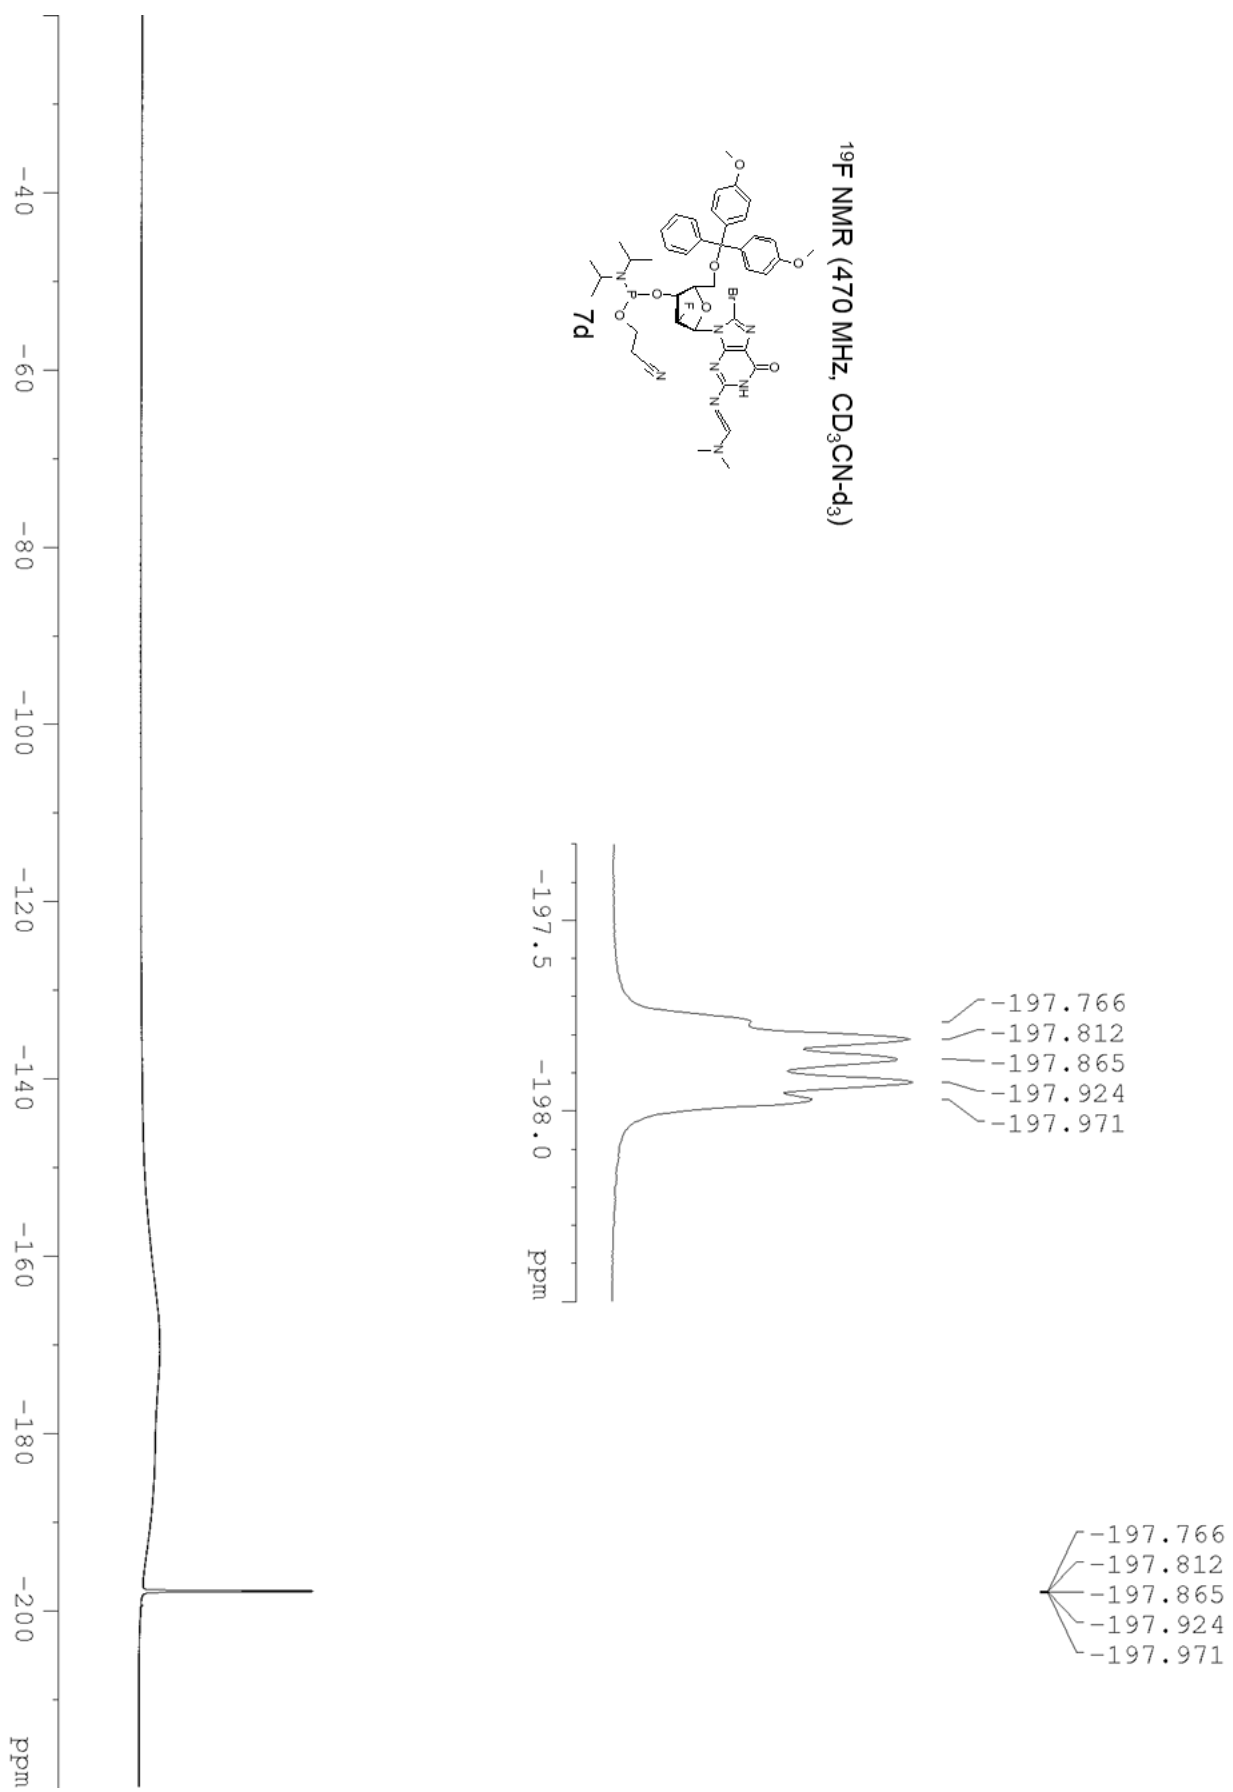

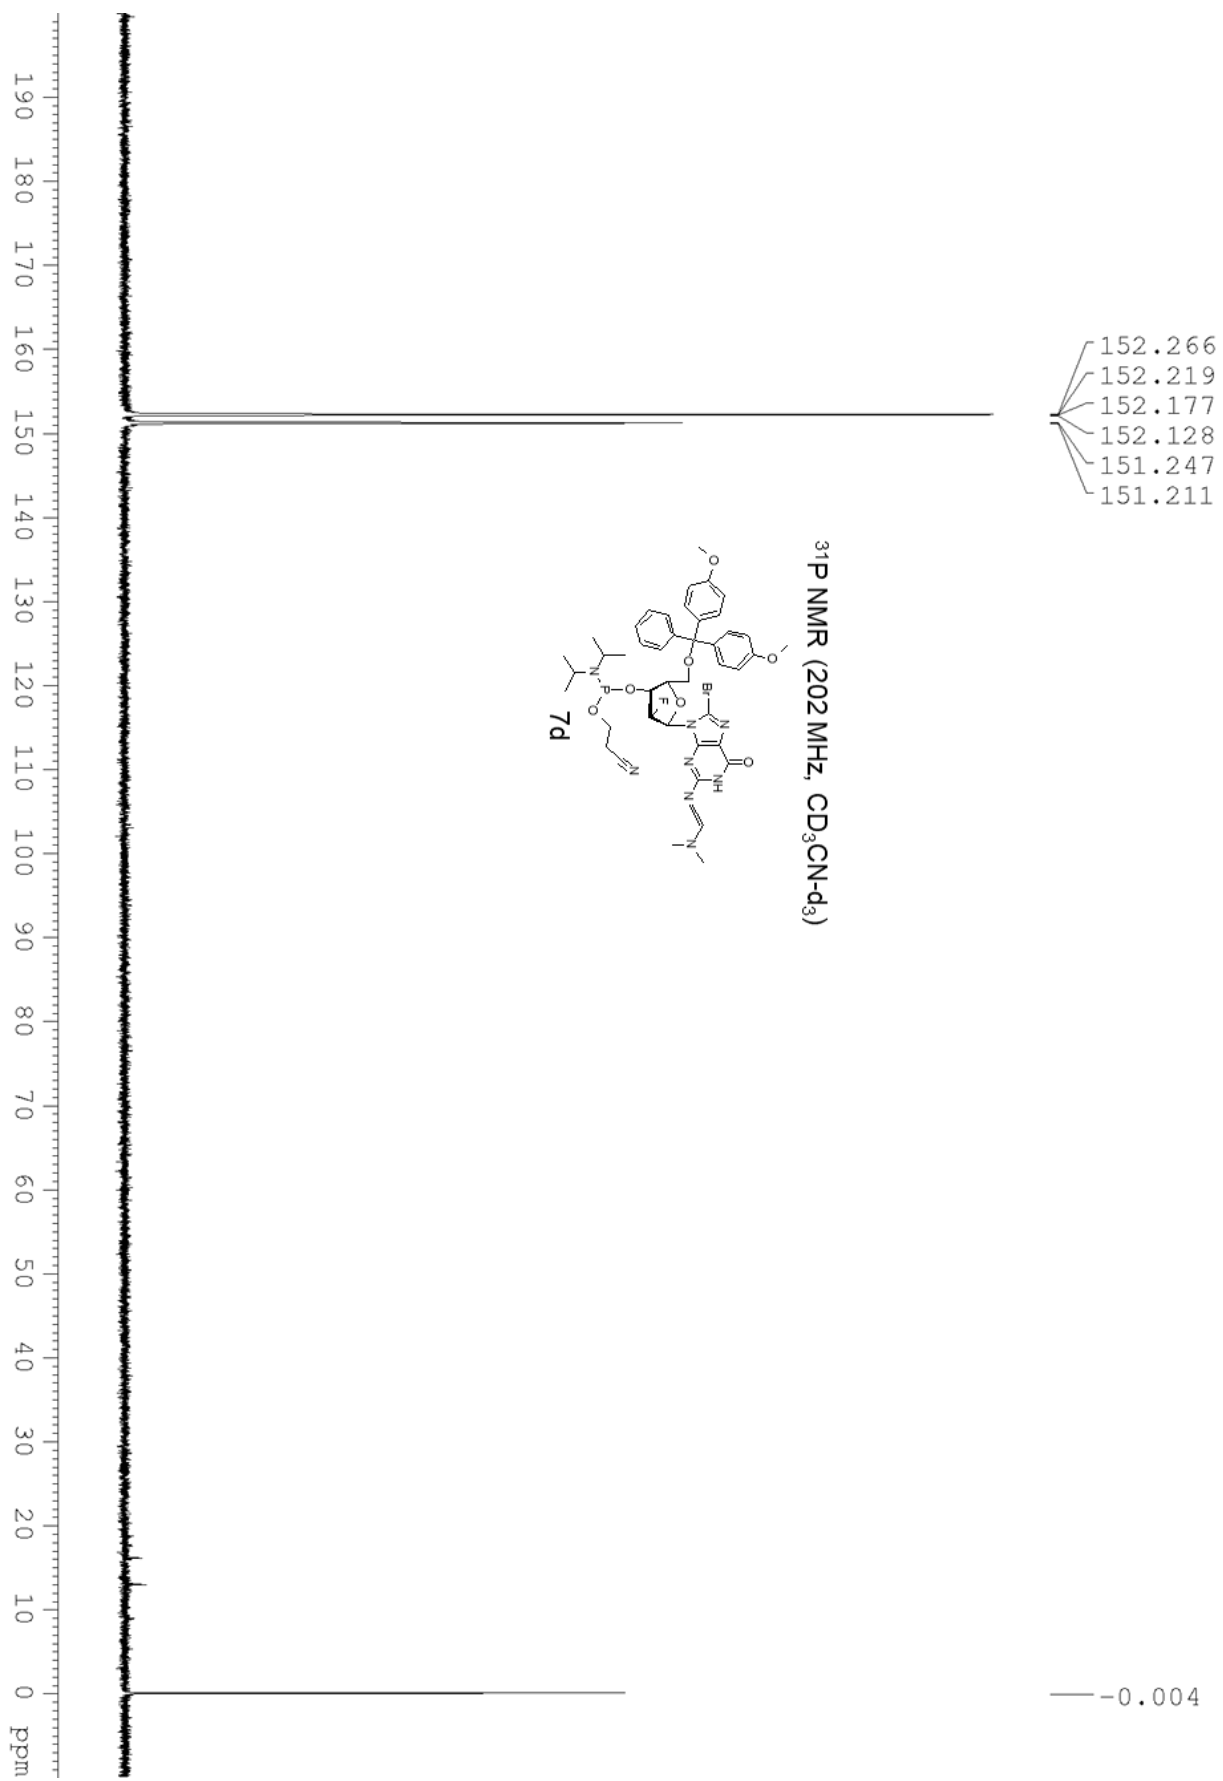

**S5. Polyacrylamide gels (kinetic assay).**

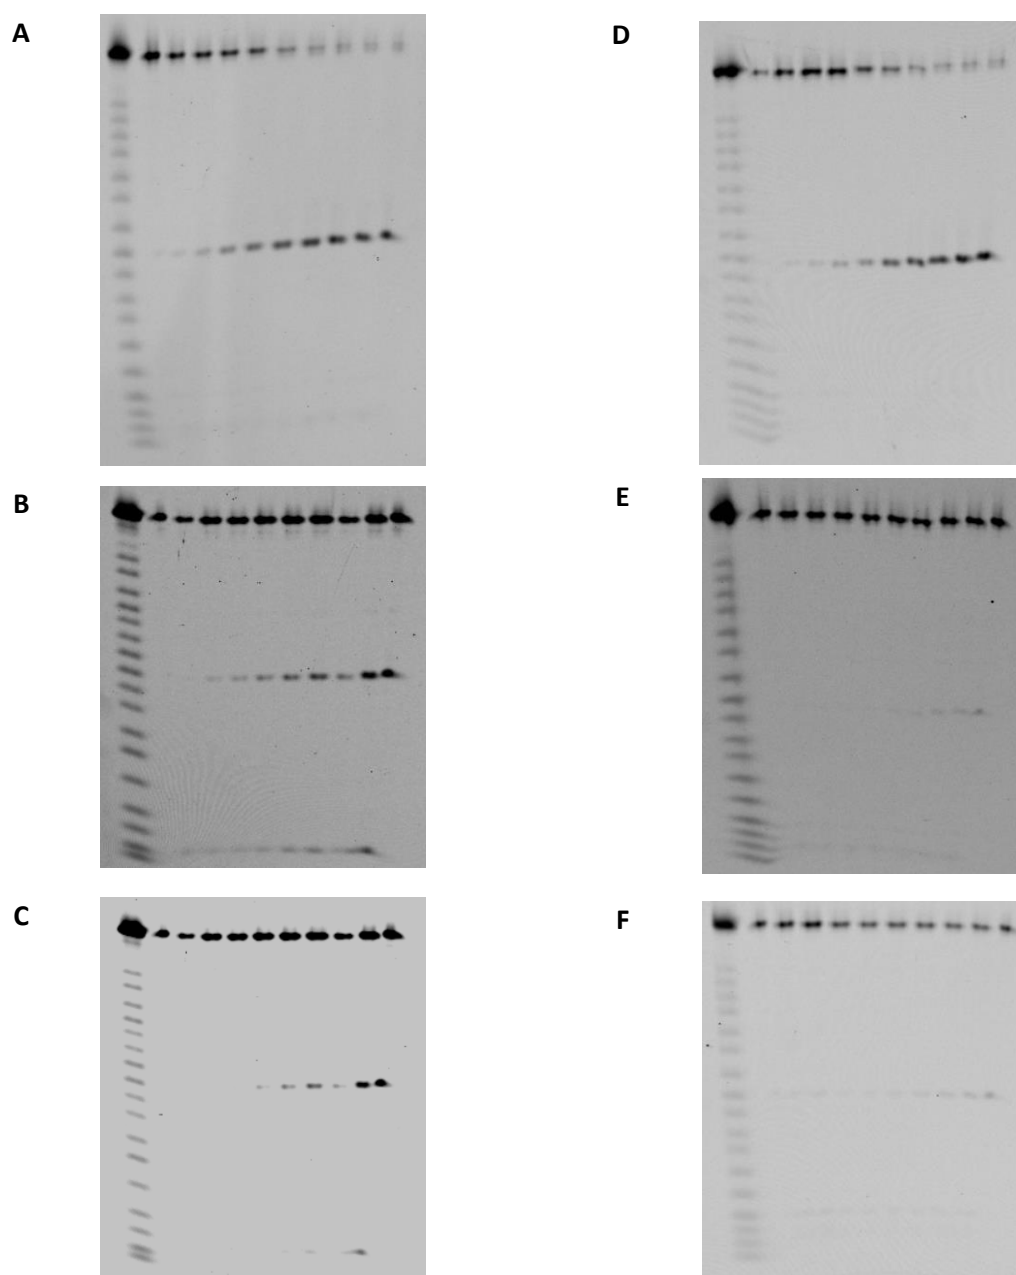

**Figure S5.** Examples of 12% polyacrylamide denaturing gels electrophoresis of chosen ribozymes kinetic assay A – RH1, B – RZ6A, C – RZ6C, D – RH1-12-5, E – RH1-8-5, F – RZ6-12-8 (Table 3). Far-left lane shows the Mg-ladder of FAM-labeled target RNA oligonucleotide. From left to right 0, 0.5, 1, 2.5, 5, 15, 30, 45, 60 and 90 min quenching time of respective ribozyme reaction. The observed cleavage is as expected after the NUH sequence in the FAM-labeled target oligoribonucleotide (Figure 1), giving a visible band of 10nt product.

## S6. Reaction rate plots.

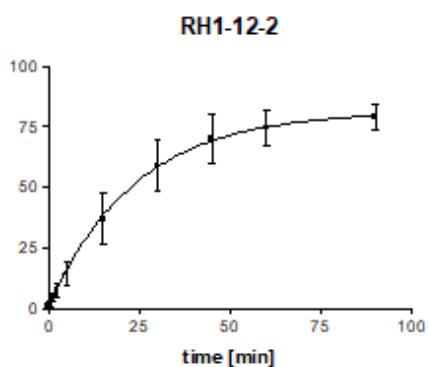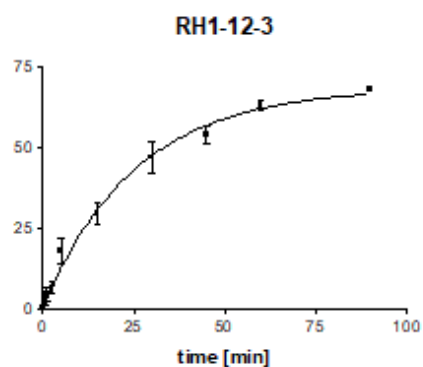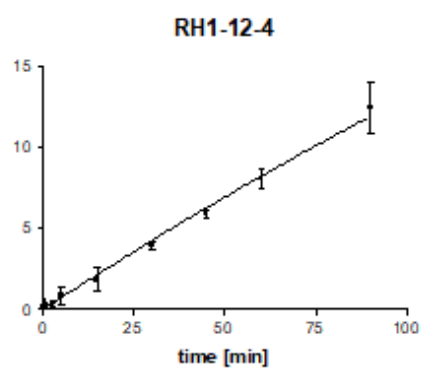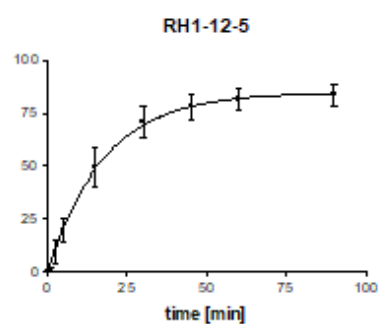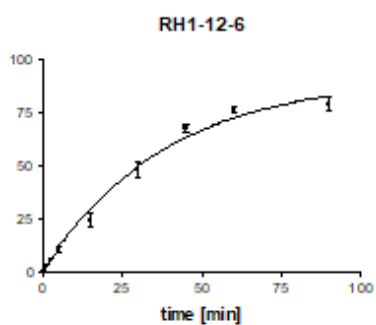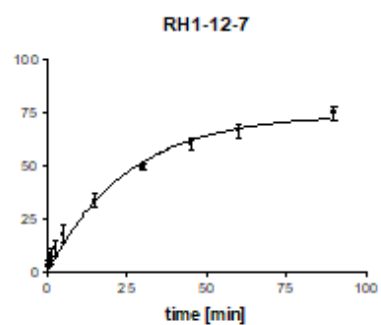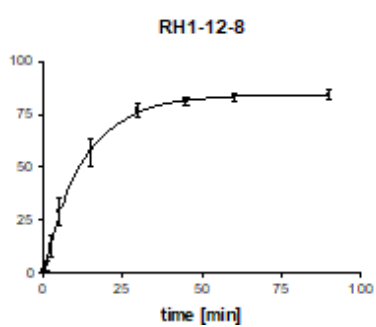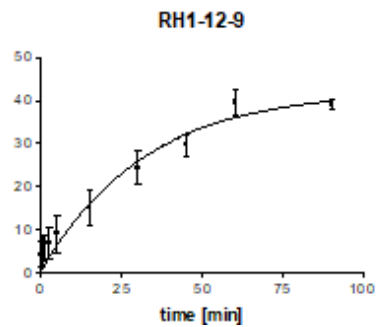

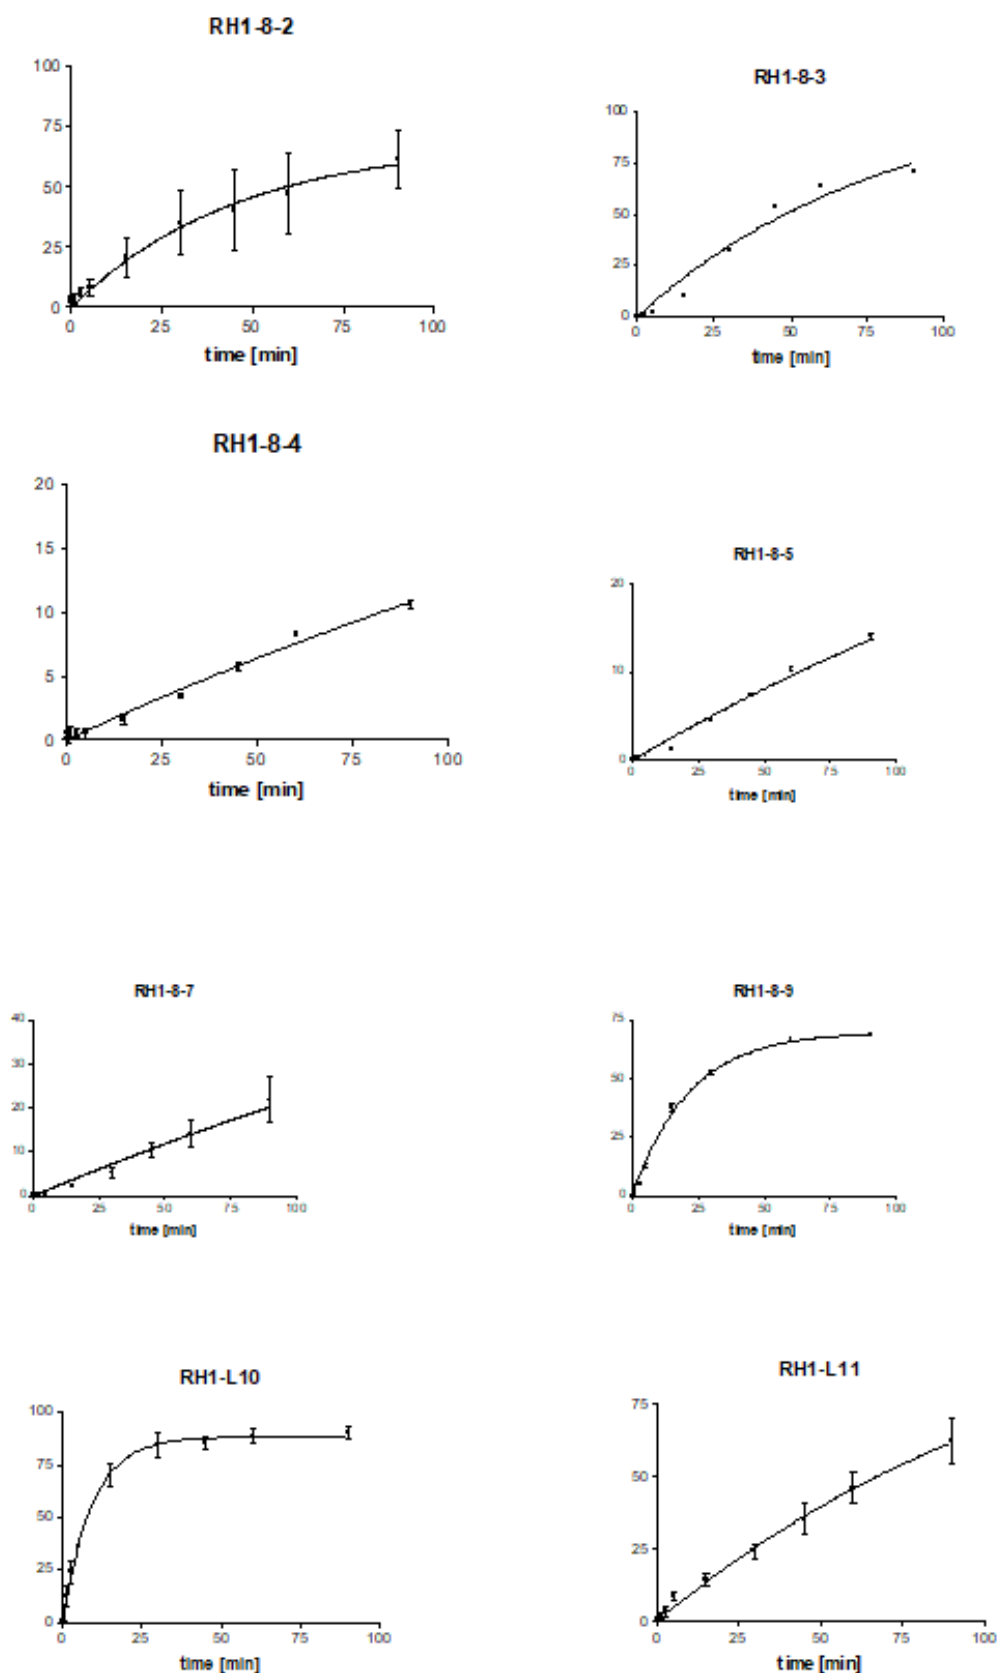

**Figure S6.** Kinetic curves of tested ribozymes. The bands from PAGE (Figure S5) were quantified, and  $k_{\text{obs}}$  parameters were obtained by fitting to  $f = 1 - e^{-kt}$  formula and collected in Table 4.

**S7. Supplemental references.**

1. Piasecka, J., Lenartowicz, E., Soszynska-Jozwiak, M., Szutkowska, B., Kierzek, R., and Kierzek, E. (2020). RNA secondary structure motifs of the influenza A virus as targets for siRNA-mediated RNA interference. *Molecular Therapy - Nucleic Acids* *19*, 627–642.
